# Supplementary material for: The hindgut microbiota of praying mantids is highly variable and includes both prey-associated and host-specific microbes
Source: PLoS One. 2018 Dec 11;13(12):e0208917. doi: 10.1371/journal.pone.0208917 (PMC6289422; doi:10.1371/journal.pone.0208917)
Supplement: S8 Table — (XLSX) [file pone.0208917.s010.xlsx]

## Sheet: S8 Table
S8 Table. Core OTUs found in the gut microbiota of all D. lobata
1	Acidobacteria;Acidobacteria_unclassified;Acidobacteria_unclassified;Acidobacteria_unclassified;Acidobacteria_unclassified;Acidobacteria_unclassified;Acidobacteria_unclassified;
2	Acidobacteria;Acidobacteria;Acidobacteriales;Acidobacteriaceae;Acidobacteriaceae_unclassified;Acidobacteriaceae_unclassified;Acidobacteriaceae_unclassified;
3	Acidobacteria;Acidobacteria;Acidobacteriales;Acidobacteriaceae;Acidobacteriaceae_unclassified;Acidobacteriaceae_unclassified;Acidobacteriaceae_unclassified;.5
4	Acidobacteria;Acidobacteria;Acidobacteriales;Acidobacteriaceae;Acidobacteriaceae_unclassified;Acidobacteriaceae_unclassified;Acidobacteriaceae_unclassified;
5	Acidobacteria;Acidobacteria;Acidobacteriales;Acidobacteriaceae;Acidobacteriaceae_unclassified;Acidobacteriaceae_unclassified;Acidobacteriaceae_unclassified;
6	Acidobacteria;Acidobacteria;Acidobacteriales;Acidobacteriaceae;Acidobacteriaceae_unclassified;Acidobacteriaceae_unclassified;Acidobacteriaceae_unclassified;
7	Acidobacteria;Acidobacteria;Acidobacteriales;Acidobacteriaceae;Candidatus_Chloroacidobacterium;Candidatus_Chloroacidobacterium_unclassified;Candidatus_Chloroacidobacterium_unclassified;.1
8	Acidobacteria;Acidobacteria;Acidobacteriales;Acidobacteriaceae;Candidatus_Chloroacidobacterium;Candidatus_Chloroacidobacterium_unclassified;Candidatus_Chloroacidobacterium_unclassified;.2
9	Acidobacteria;Acidobacteria;Acidobacteriales;Acidobacteriaceae;Candidatus_Chloroacidobacterium;Candidatus_Chloroacidobacterium_unclassified;Candidatus_Chloroacidobacterium_unclassified;.3
10	Acidobacteria;Acidobacteria;Acidobacteriales;Acidobacteriaceae;Candidatus_Koribacter;Candidatus_Koribacter_unclassified;Candidatus_Koribacter_unclassified;
11	Acidobacteria;Acidobacteria;Acidobacteriales;Acidobacteriaceae;Candidatus_Solibacter;Candidatus_Solibacter_unclassified;Candidatus_Solibacter_unclassified;
12	Acidobacteria;Acidobacteria;Acidobacteriales;Acidobacteriaceae;Candidatus_Solibacter;Candidatus_Solibacter_unclassified;Candidatus_Solibacter_unclassified;.1
13	Acidobacteria;Acidobacteria;Acidobacteriales;Acidobacteriaceae;Candidatus_Solibacter;Candidatus_Solibacter_unclassified;Candidatus_Solibacter_unclassified;.10
14	Acidobacteria;Acidobacteria;Acidobacteriales;Acidobacteriaceae;Candidatus_Solibacter;Candidatus_Solibacter_unclassified;Candidatus_Solibacter_unclassified;.12
15	Acidobacteria;Acidobacteria;Acidobacteriales;Acidobacteriaceae;Candidatus_Solibacter;Candidatus_Solibacter_unclassified;Candidatus_Solibacter_unclassified;.14
16	Acidobacteria;Acidobacteria;Acidobacteriales;Acidobacteriaceae;Candidatus_Solibacter;Candidatus_Solibacter_unclassified;Candidatus_Solibacter_unclassified;.19
17	Acidobacteria;Acidobacteria;Acidobacteriales;Acidobacteriaceae;Candidatus_Solibacter;Candidatus_Solibacter_unclassified;Candidatus_Solibacter_unclassified;.2
18	Acidobacteria;Acidobacteria;Acidobacteriales;Acidobacteriaceae;Candidatus_Solibacter;Candidatus_Solibacter_unclassified;Candidatus_Solibacter_unclassified;.3
19	Acidobacteria;Acidobacteria;Acidobacteriales;Acidobacteriaceae;Candidatus_Solibacter;Candidatus_Solibacter_unclassified;Candidatus_Solibacter_unclassified;.32
20	Acidobacteria;Acidobacteria;Acidobacteriales;Acidobacteriaceae;Candidatus_Solibacter;Candidatus_Solibacter_unclassified;Candidatus_Solibacter_unclassified;.4
21	Acidobacteria;Acidobacteria;Acidobacteriales;Acidobacteriaceae;Candidatus_Solibacter;Candidatus_Solibacter_unclassified;Candidatus_Solibacter_unclassified;.6
22	Acidobacteria;Acidobacteria;Acidobacteriales;Acidobacteriaceae;Candidatus_Solibacter;Candidatus_Solibacter_unclassified;Candidatus_Solibacter_unclassified;.7
23	Acidobacteria;Acidobacteria;Acidobacteriales;Acidobacteriaceae;Candidatus_Solibacter;Candidatus_Solibacter_unclassified;Candidatus_Solibacter_unclassified;.9
24	Acidobacteria;Acidobacteria;Acidobacteriales;Acidobacteriaceae;Candidatus_Solibacter;Candidatus_Solibacter_unclassified;Candidatus_Solibacter_unclassified;
25	Acidobacteria;Acidobacteria;Acidobacteriales;Acidobacteriaceae;Uncultured_1;Uncultured_1_unclassified;Uncultured_1_unclassified;
26	Acidobacteria;Acidobacteria;Acidobacteriales;Acidobacteriaceae;Uncultured_1;Uncultured_1_unclassified;Uncultured_1_unclassified;.1
27	Acidobacteria;Acidobacteria;Acidobacteriales;Acidobacteriaceae;Uncultured_1;Uncultured_1_unclassified;Uncultured_1_unclassified;.2
28	Acidobacteria;Acidobacteria;Acidobacteriales;Acidobacteriaceae;Uncultured_1;Uncultured_1_unclassified;Uncultured_1_unclassified;.3
29	Acidobacteria;Acidobacteria;Acidobacteriales;Acidobacteriaceae;Uncultured_1;Uncultured_1_unclassified;Uncultured_1_unclassified;.4
30	Acidobacteria;Acidobacteria;Acidobacteriales;Acidobacteriaceae;Uncultured_1;Uncultured_1_unclassified;Uncultured_1_unclassified;.5
31	Acidobacteria;Acidobacteria;Acidobacteriales;Acidobacteriaceae;Uncultured_1;Uncultured_1_unclassified;Uncultured_1_unclassified;.7
32	Acidobacteria;Acidobacteria;Acidobacteriales;Acidobacteriaceae;Uncultured_1;Uncultured_1_unclassified;Uncultured_1_unclassified;
33	Acidobacteria;Acidobacteria;Acidobacteriales;Acidobacteriaceae;Uncultured_10;Uncultured_10_unclassified;Uncultured_10_unclassified;
34	Acidobacteria;Acidobacteria;Acidobacteriales;Acidobacteriaceae;Uncultured_10;Uncultured_10_unclassified;Uncultured_10_unclassified;.2
35	Acidobacteria;Acidobacteria;Acidobacteriales;Acidobacteriaceae;Uncultured_11;Uncultured_11_unclassified;Uncultured_11_unclassified;
36	Acidobacteria;Acidobacteria;Acidobacteriales;Acidobacteriaceae;Uncultured_17;Uncultured_17_unclassified;Uncultured_17_unclassified;
37	Acidobacteria;Acidobacteria;Acidobacteriales;Acidobacteriaceae;Uncultured_18;Uncultured_18_unclassified;Uncultured_18_unclassified;
38	Acidobacteria;Acidobacteria;Acidobacteriales;Acidobacteriaceae;Uncultured_18;Uncultured_18_unclassified;Uncultured_18_unclassified;.4
39	Acidobacteria;Acidobacteria;Acidobacteriales;Acidobacteriaceae;Uncultured_18;Uncultured_18_unclassified;Uncultured_18_unclassified;
40	Acidobacteria;Acidobacteria;Acidobacteriales;Acidobacteriaceae;Uncultured_18;Uncultured_18_unclassified;Uncultured_18_unclassified;
41	Acidobacteria;Acidobacteria;Acidobacteriales;Acidobacteriaceae;Uncultured_18;Uncultured_18_unclassified;Uncultured_18_unclassified;
42	Acidobacteria;Acidobacteria;Acidobacteriales;Acidobacteriaceae;Uncultured_18;Uncultured_18_unclassified;Uncultured_18_unclassified;
43	Acidobacteria;Acidobacteria;Acidobacteriales;Acidobacteriaceae;Uncultured_18;Uncultured_18_unclassified;Uncultured_18_unclassified;
44	Acidobacteria;Acidobacteria;Acidobacteriales;Acidobacteriaceae;Uncultured_2;Uncultured_2_unclassified;Uncultured_2_unclassified;.1
45	Acidobacteria;Acidobacteria;Acidobacteriales;Acidobacteriaceae;Uncultured_22;Uncultured_22_unclassified;Uncultured_22_unclassified;
46	Acidobacteria;Acidobacteria;Acidobacteriales;Acidobacteriaceae;Uncultured_22;Uncultured_22_unclassified;Uncultured_22_unclassified;.1
47	Acidobacteria;Acidobacteria;Acidobacteriales;Acidobacteriaceae;Uncultured_22;Uncultured_22_unclassified;Uncultured_22_unclassified;.10
48	Acidobacteria;Acidobacteria;Acidobacteriales;Acidobacteriaceae;Uncultured_22;Uncultured_22_unclassified;Uncultured_22_unclassified;.12
49	Acidobacteria;Acidobacteria;Acidobacteriales;Acidobacteriaceae;Uncultured_22;Uncultured_22_unclassified;Uncultured_22_unclassified;.13
50	Acidobacteria;Acidobacteria;Acidobacteriales;Acidobacteriaceae;Uncultured_22;Uncultured_22_unclassified;Uncultured_22_unclassified;.14
51	Acidobacteria;Acidobacteria;Acidobacteriales;Acidobacteriaceae;Uncultured_22;Uncultured_22_unclassified;Uncultured_22_unclassified;.16
52	Acidobacteria;Acidobacteria;Acidobacteriales;Acidobacteriaceae;Uncultured_22;Uncultured_22_unclassified;Uncultured_22_unclassified;.2
53	Acidobacteria;Acidobacteria;Acidobacteriales;Acidobacteriaceae;Uncultured_22;Uncultured_22_unclassified;Uncultured_22_unclassified;.3
54	Acidobacteria;Acidobacteria;Acidobacteriales;Acidobacteriaceae;Uncultured_22;Uncultured_22_unclassified;Uncultured_22_unclassified;.4
55	Acidobacteria;Acidobacteria;Acidobacteriales;Acidobacteriaceae;Uncultured_22;Uncultured_22_unclassified;Uncultured_22_unclassified;.5
56	Acidobacteria;Acidobacteria;Acidobacteriales;Acidobacteriaceae;Uncultured_22;Uncultured_22_unclassified;Uncultured_22_unclassified;.6
57	Acidobacteria;Acidobacteria;Acidobacteriales;Acidobacteriaceae;Uncultured_22;Uncultured_22_unclassified;Uncultured_22_unclassified;.7
58	Acidobacteria;Acidobacteria;Acidobacteriales;Acidobacteriaceae;Uncultured_22;Uncultured_22_unclassified;Uncultured_22_unclassified;.9
59	Acidobacteria;Acidobacteria;Acidobacteriales;Acidobacteriaceae;Uncultured_22;Uncultured_22_unclassified;Uncultured_22_unclassified;
60	Acidobacteria;Acidobacteria;Acidobacteriales;Acidobacteriaceae;Uncultured_22;Uncultured_22_unclassified;Uncultured_22_unclassified;
61	Acidobacteria;Acidobacteria;Acidobacteriales;Acidobacteriaceae;Uncultured_23;Uncultured_23_unclassified;Uncultured_23_unclassified;
62	Acidobacteria;Acidobacteria;Acidobacteriales;Acidobacteriaceae;Uncultured_23;Uncultured_23_unclassified;Uncultured_23_unclassified;.1
63	Acidobacteria;Acidobacteria;Acidobacteriales;Acidobacteriaceae;Uncultured_25;Uncultured_25_unclassified;Uncultured_25_unclassified;
64	Acidobacteria;Acidobacteria;Acidobacteriales;Acidobacteriaceae;Uncultured_25;Uncultured_25_unclassified;Uncultured_25_unclassified;.2
65	Acidobacteria;Acidobacteria;Acidobacteriales;Acidobacteriaceae;Uncultured_26;Uncultured_26_unclassified;Uncultured_26_unclassified;
66	Acidobacteria;Acidobacteria;Acidobacteriales;Acidobacteriaceae;Uncultured_26;Uncultured_26_unclassified;Uncultured_26_unclassified;.1
67	Acidobacteria;Acidobacteria;Acidobacteriales;Acidobacteriaceae;Uncultured_26;Uncultured_26_unclassified;Uncultured_26_unclassified;.2
68	Acidobacteria;Acidobacteria;Acidobacteriales;Acidobacteriaceae;Uncultured_26;Uncultured_26_unclassified;Uncultured_26_unclassified;.3
69	Acidobacteria;Acidobacteria;Acidobacteriales;Acidobacteriaceae;Uncultured_26;Uncultured_26_unclassified;Uncultured_26_unclassified;
70	Acidobacteria;Acidobacteria;Acidobacteriales;Acidobacteriaceae;Uncultured_27;Uncultured_27_unclassified;Uncultured_27_unclassified;
71	Acidobacteria;Acidobacteria;Acidobacteriales;Acidobacteriaceae;Uncultured_27;Uncultured_27_unclassified;Uncultured_27_unclassified;.1
72	Acidobacteria;Acidobacteria;Acidobacteriales;Acidobacteriaceae;Uncultured_27;Uncultured_27_unclassified;Uncultured_27_unclassified;.14
73	Acidobacteria;Acidobacteria;Acidobacteriales;Acidobacteriaceae;Uncultured_27;Uncultured_27_unclassified;Uncultured_27_unclassified;.2
74	Acidobacteria;Acidobacteria;Acidobacteriales;Acidobacteriaceae;Uncultured_27;Uncultured_27_unclassified;Uncultured_27_unclassified;.25
75	Acidobacteria;Acidobacteria;Acidobacteriales;Acidobacteriaceae;Uncultured_27;Uncultured_27_unclassified;Uncultured_27_unclassified;.3
76	Acidobacteria;Acidobacteria;Acidobacteriales;Acidobacteriaceae;Uncultured_27;Uncultured_27_unclassified;Uncultured_27_unclassified;.5
77	Acidobacteria;Acidobacteria;Acidobacteriales;Acidobacteriaceae;Uncultured_27;Uncultured_27_unclassified;Uncultured_27_unclassified;.6
78	Acidobacteria;Acidobacteria;Acidobacteriales;Acidobacteriaceae;Uncultured_31;Uncultured_31_unclassified;Uncultured_31_unclassified;
79	Acidobacteria;Acidobacteria;Acidobacteriales;Acidobacteriaceae;Uncultured_31;Uncultured_31_unclassified;Uncultured_31_unclassified;.1
80	Acidobacteria;Acidobacteria;Acidobacteriales;Acidobacteriaceae;Uncultured_31;Uncultured_31_unclassified;Uncultured_31_unclassified;.10
81	Acidobacteria;Acidobacteria;Acidobacteriales;Acidobacteriaceae;Uncultured_31;Uncultured_31_unclassified;Uncultured_31_unclassified;.11
82	Acidobacteria;Acidobacteria;Acidobacteriales;Acidobacteriaceae;Uncultured_31;Uncultured_31_unclassified;Uncultured_31_unclassified;.12
83	Acidobacteria;Acidobacteria;Acidobacteriales;Acidobacteriaceae;Uncultured_31;Uncultured_31_unclassified;Uncultured_31_unclassified;.13
84	Acidobacteria;Acidobacteria;Acidobacteriales;Acidobacteriaceae;Uncultured_31;Uncultured_31_unclassified;Uncultured_31_unclassified;.14
85	Acidobacteria;Acidobacteria;Acidobacteriales;Acidobacteriaceae;Uncultured_31;Uncultured_31_unclassified;Uncultured_31_unclassified;.15
86	Acidobacteria;Acidobacteria;Acidobacteriales;Acidobacteriaceae;Uncultured_31;Uncultured_31_unclassified;Uncultured_31_unclassified;.16
87	Acidobacteria;Acidobacteria;Acidobacteriales;Acidobacteriaceae;Uncultured_31;Uncultured_31_unclassified;Uncultured_31_unclassified;.17
88	Acidobacteria;Acidobacteria;Acidobacteriales;Acidobacteriaceae;Uncultured_31;Uncultured_31_unclassified;Uncultured_31_unclassified;.18
89	Acidobacteria;Acidobacteria;Acidobacteriales;Acidobacteriaceae;Uncultured_31;Uncultured_31_unclassified;Uncultured_31_unclassified;.19
90	Acidobacteria;Acidobacteria;Acidobacteriales;Acidobacteriaceae;Uncultured_31;Uncultured_31_unclassified;Uncultured_31_unclassified;.2
91	Acidobacteria;Acidobacteria;Acidobacteriales;Acidobacteriaceae;Uncultured_31;Uncultured_31_unclassified;Uncultured_31_unclassified;.20
92	Acidobacteria;Acidobacteria;Acidobacteriales;Acidobacteriaceae;Uncultured_31;Uncultured_31_unclassified;Uncultured_31_unclassified;.21
93	Acidobacteria;Acidobacteria;Acidobacteriales;Acidobacteriaceae;Uncultured_31;Uncultured_31_unclassified;Uncultured_31_unclassified;.23
94	Acidobacteria;Acidobacteria;Acidobacteriales;Acidobacteriaceae;Uncultured_31;Uncultured_31_unclassified;Uncultured_31_unclassified;.24
95	Acidobacteria;Acidobacteria;Acidobacteriales;Acidobacteriaceae;Uncultured_31;Uncultured_31_unclassified;Uncultured_31_unclassified;.25
96	Acidobacteria;Acidobacteria;Acidobacteriales;Acidobacteriaceae;Uncultured_31;Uncultured_31_unclassified;Uncultured_31_unclassified;.26
97	Acidobacteria;Acidobacteria;Acidobacteriales;Acidobacteriaceae;Uncultured_31;Uncultured_31_unclassified;Uncultured_31_unclassified;.27
98	Acidobacteria;Acidobacteria;Acidobacteriales;Acidobacteriaceae;Uncultured_31;Uncultured_31_unclassified;Uncultured_31_unclassified;.3
99	Acidobacteria;Acidobacteria;Acidobacteriales;Acidobacteriaceae;Uncultured_31;Uncultured_31_unclassified;Uncultured_31_unclassified;.30
100	Acidobacteria;Acidobacteria;Acidobacteriales;Acidobacteriaceae;Uncultured_31;Uncultured_31_unclassified;Uncultured_31_unclassified;.33
101	Acidobacteria;Acidobacteria;Acidobacteriales;Acidobacteriaceae;Uncultured_31;Uncultured_31_unclassified;Uncultured_31_unclassified;.34
102	Acidobacteria;Acidobacteria;Acidobacteriales;Acidobacteriaceae;Uncultured_31;Uncultured_31_unclassified;Uncultured_31_unclassified;.38
103	Acidobacteria;Acidobacteria;Acidobacteriales;Acidobacteriaceae;Uncultured_31;Uncultured_31_unclassified;Uncultured_31_unclassified;.39
104	Acidobacteria;Acidobacteria;Acidobacteriales;Acidobacteriaceae;Uncultured_31;Uncultured_31_unclassified;Uncultured_31_unclassified;.4
105	Acidobacteria;Acidobacteria;Acidobacteriales;Acidobacteriaceae;Uncultured_31;Uncultured_31_unclassified;Uncultured_31_unclassified;.40
106	Acidobacteria;Acidobacteria;Acidobacteriales;Acidobacteriaceae;Uncultured_31;Uncultured_31_unclassified;Uncultured_31_unclassified;.41
107	Acidobacteria;Acidobacteria;Acidobacteriales;Acidobacteriaceae;Uncultured_31;Uncultured_31_unclassified;Uncultured_31_unclassified;.45
108	Acidobacteria;Acidobacteria;Acidobacteriales;Acidobacteriaceae;Uncultured_31;Uncultured_31_unclassified;Uncultured_31_unclassified;.5
109	Acidobacteria;Acidobacteria;Acidobacteriales;Acidobacteriaceae;Uncultured_31;Uncultured_31_unclassified;Uncultured_31_unclassified;.55
110	Acidobacteria;Acidobacteria;Acidobacteriales;Acidobacteriaceae;Uncultured_31;Uncultured_31_unclassified;Uncultured_31_unclassified;.6
111	Acidobacteria;Acidobacteria;Acidobacteriales;Acidobacteriaceae;Uncultured_31;Uncultured_31_unclassified;Uncultured_31_unclassified;.7
112	Acidobacteria;Acidobacteria;Acidobacteriales;Acidobacteriaceae;Uncultured_31;Uncultured_31_unclassified;Uncultured_31_unclassified;.8
113	Acidobacteria;Acidobacteria;Acidobacteriales;Acidobacteriaceae;Uncultured_31;Uncultured_31_unclassified;Uncultured_31_unclassified;.87
114	Acidobacteria;Acidobacteria;Acidobacteriales;Acidobacteriaceae;Uncultured_31;Uncultured_31_unclassified;Uncultured_31_unclassified;.9
115	Acidobacteria;Acidobacteria;Acidobacteriales;Acidobacteriaceae;Uncultured_31;Uncultured_31_unclassified;Uncultured_31_unclassified;
116	Acidobacteria;Acidobacteria;Acidobacteriales;Acidobacteriaceae;Uncultured_31;Uncultured_31_unclassified;Uncultured_31_unclassified;
117	Acidobacteria;Acidobacteria;Acidobacteriales;Acidobacteriaceae;Uncultured_31;Uncultured_31_unclassified;Uncultured_31_unclassified;
118	Acidobacteria;Acidobacteria;Acidobacteriales;Acidobacteriaceae;Uncultured_31;Uncultured_31_unclassified;Uncultured_31_unclassified;
119	Acidobacteria;Acidobacteria;Acidobacteriales;Acidobacteriaceae;Uncultured_5;Uncultured_5_unclassified;Uncultured_5_unclassified;
120	Acidobacteria;Acidobacteria;Acidobacteriales;Acidobacteriaceae;Uncultured_7;Uncultured_7_unclassified;Uncultured_7_unclassified;
121	Acidobacteria;Acidobacteria;Acidobacteriales;Acidobacteriaceae;Uncultured_9;Uncultured_9_unclassified;Uncultured_9_unclassified;
122	Acidobacteria;Acidobacteria;Acidobacteriales;Acidobacteriaceae;Uncultured_9;Uncultured_9_unclassified;Uncultured_9_unclassified;.1
123	Acidobacteria;Acidobacteria;Acidobacteriales;Acidobacteriaceae;Uncultured_9;Uncultured_9_unclassified;Uncultured_9_unclassified;.12
124	Acidobacteria;Acidobacteria;Acidobacteriales;Acidobacteriaceae;Uncultured_9;Uncultured_9_unclassified;Uncultured_9_unclassified;.2
125	Acidobacteria;Acidobacteria;Acidobacteriales;Acidobacteriaceae;Uncultured_9;Uncultured_9_unclassified;Uncultured_9_unclassified;.3
126	Acidobacteria;Acidobacteria;Acidobacteriales;Acidobacteriaceae;Uncultured_9;Uncultured_9_unclassified;Uncultured_9_unclassified;.4
127	Acidobacteria;Acidobacteria;Acidobacteriales;Acidobacteriaceae;Uncultured_9;Uncultured_9_unclassified;Uncultured_9_unclassified;.5
128	Acidobacteria;Acidobacteria;Acidobacteriales;Acidobacteriaceae;Uncultured_9;Uncultured_9_unclassified;Uncultured_9_unclassified;.6
129	Acidobacteria;Acidobacteria;Acidobacteriales;Acidobacteriaceae;Uncultured_9;Uncultured_9_unclassified;Uncultured_9_unclassified;.7
130	Acidobacteria;Acidobacteria;Acidobacteriales;Acidobacteriaceae;Uncultured_9;Uncultured_9_unclassified;Uncultured_9_unclassified;.8
131	Acidobacteria;Holophagae;Cluster_32-20;Cluster_32-20_unclassified;Cluster_32-20_unclassified;Cluster_32-20_unclassified;Cluster_32-20_unclassified;
132	Acidobacteria;Holophagae;Cluster_32-20;Cluster_32-20_unclassified;Cluster_32-20_unclassified;Cluster_32-20_unclassified;Cluster_32-20_unclassified;.1
133	Acidobacteria;Holophagae;F-1404R;F-1404R_unclassified;F-1404R_unclassified;F-1404R_unclassified;F-1404R_unclassified;
134	Acidobacteria;Holophagae;F-1404R;F-1404R_unclassified;F-1404R_unclassified;F-1404R_unclassified;F-1404R_unclassified;.1
135	Acidobacteria;Holophagae;F-1404R;F-1404R_unclassified;F-1404R_unclassified;F-1404R_unclassified;F-1404R_unclassified;.2
136	Acidobacteria;Holophagae;F-1404R;F-1404R_unclassified;F-1404R_unclassified;F-1404R_unclassified;F-1404R_unclassified;.3
137	Acidobacteria;Holophagae;Holophagae_unclassified;Holophagae_unclassified;Holophagae_unclassified;Holophagae_unclassified;Holophagae_unclassified;
138	Acidobacteria;Holophagae;iii1_8;iii1_8_unclassified;iii1_8_unclassified;iii1_8_unclassified;iii1_8_unclassified;
139	Acidobacteria;Holophagae;iii1_8;iii1_8_unclassified;iii1_8_unclassified;iii1_8_unclassified;iii1_8_unclassified;.1
140	Acidobacteria;Holophagae;SJA-36;SJA-36_unclassified;SJA-36_unclassified;SJA-36_unclassified;SJA-36_unclassified;
141	Acidobacteria;Holophagae;SJA-36;SJA-36_unclassified;SJA-36_unclassified;SJA-36_unclassified;SJA-36_unclassified;.1
142	Acidobacteria;RB25;RB25_unclassified;RB25_unclassified;RB25_unclassified;RB25_unclassified;RB25_unclassified;
143	Acidobacteria;RB25;RB25_unclassified;RB25_unclassified;RB25_unclassified;RB25_unclassified;RB25_unclassified;.1
144	Acidobacteria;RB25;RB25_unclassified;RB25_unclassified;RB25_unclassified;RB25_unclassified;RB25_unclassified;.13
145	Acidobacteria;RB25;RB25_unclassified;RB25_unclassified;RB25_unclassified;RB25_unclassified;RB25_unclassified;.14
146	Acidobacteria;RB25;RB25_unclassified;RB25_unclassified;RB25_unclassified;RB25_unclassified;RB25_unclassified;.2
147	Acidobacteria;RB25;RB25_unclassified;RB25_unclassified;RB25_unclassified;RB25_unclassified;RB25_unclassified;.3
148	Acidobacteria;RB25;RB25_unclassified;RB25_unclassified;RB25_unclassified;RB25_unclassified;RB25_unclassified;.4
149	Acidobacteria;RB25;RB25_unclassified;RB25_unclassified;RB25_unclassified;RB25_unclassified;RB25_unclassified;.5
150	Acidobacteria;RB25;RB25_unclassified;RB25_unclassified;RB25_unclassified;RB25_unclassified;RB25_unclassified;.7
151	Acidobacteria;RB25;RB25_unclassified;RB25_unclassified;RB25_unclassified;RB25_unclassified;RB25_unclassified;.8
152	Actinobacteria;Actinobacteria;Acidimicrobiales;Acidimicrobiaceae_1;Ilumatobacter;Ilumatobacter_unclassified;Ilumatobacter_unclassified;
153	Actinobacteria;Actinobacteria;Acidimicrobiales;Acidimicrobiaceae_1;Uncultured_3;Uncultured_3_unclassified;Uncultured_3_unclassified;
154	Actinobacteria;Actinobacteria;Acidimicrobiales;Acidimicrobiaceae_1;Uncultured_4;Uncultured_4_unclassified;Uncultured_4_unclassified;
155	Actinobacteria;Actinobacteria;Acidimicrobiales;Acidimicrobiaceae_1;Uncultured_4;Uncultured_4_unclassified;Uncultured_4_unclassified;
156	Actinobacteria;Actinobacteria;Acidimicrobiales;Acidimicrobiaceae_1;Acidimicrobiaceae_1_unclassified;Acidimicrobiaceae_1_unclassified;Acidimicrobiaceae_1_unclassified;
157	Actinobacteria;Actinobacteria;Acidimicrobiales;Acidimicrobiaceae_1;marine_group;marine_group_unclassified;marine_group_unclassified;
158	Actinobacteria;Actinobacteria;Acidimicrobiales;Acidimicrobiales_unclassified;Acidimicrobiales_unclassified;Acidimicrobiales_unclassified;Acidimicrobiales_unclassified;.2
159	Actinobacteria;Actinobacteria;Acidimicrobiales;Acidimicrobiales_unclassified;Acidimicrobiales_unclassified;Acidimicrobiales_unclassified;Acidimicrobiales_unclassified;.5
160	Actinobacteria;Actinobacteria;Acidimicrobiales;Acidimicrobiales_unclassified;Acidimicrobiales_unclassified;Acidimicrobiales_unclassified;Acidimicrobiales_unclassified;
161	Actinobacteria;Actinobacteria;Acidimicrobiales;Acidimicrobiales_unclassified;Acidimicrobiales_unclassified;Acidimicrobiales_unclassified;Acidimicrobiales_unclassified;
162	Actinobacteria;Actinobacteria;Acidimicrobiales;Candidatus_Microthrix;Candidatus_Microthrix;Candidatus_Microthrix_unclassified;Candidatus_Microthrix_unclassified;
163	Actinobacteria;Actinobacteria;Acidimicrobiales;Uncultured_6;Uncultured_6_unclassified;Uncultured_6_unclassified;Uncultured_6_unclassified;
164	Actinobacteria;Actinobacteria;Acidimicrobiales;Uncultured_6;Uncultured_6_unclassified;Uncultured_6_unclassified;Uncultured_6_unclassified;.1
165	Actinobacteria;Actinobacteria;Acidimicrobiales;Uncultured_6;Uncultured_6_unclassified;Uncultured_6_unclassified;Uncultured_6_unclassified;.2
166	Actinobacteria;Actinobacteria;Acidimicrobiales;Uncultured_6;Uncultured_6_unclassified;Uncultured_6_unclassified;Uncultured_6_unclassified;.4
167	Actinobacteria;Actinobacteria;Acidimicrobiales;Uncultured_6;Uncultured_6_unclassified;Uncultured_6_unclassified;Uncultured_6_unclassified;
168	Actinobacteria;Actinobacteria;Acidimicrobiales;Uncultured_6;Uncultured_6_unclassified;Uncultured_6_unclassified;Uncultured_6_unclassified;
169	Actinobacteria;Actinobacteria;Acidimicrobiales;Uncultured_6;Uncultured_6_unclassified;Uncultured_6_unclassified;Uncultured_6_unclassified;
170	Actinobacteria;Actinobacteria;Actinobacteria_unclassified;Actinobacteria_unclassified;Actinobacteria_unclassified;Actinobacteria_unclassified;Actinobacteria_unclassified;.16
171	Actinobacteria;Actinobacteria;Actinomycetales_1;Streptomycetaceae;Streptomyces_3;Streptomyces_3_unclassified;Streptomyces_3_unclassified;
172	Actinobacteria;Actinobacteria;AKIW543;AKIW543_unclassified;AKIW543_unclassified;AKIW543_unclassified;AKIW543_unclassified;
173	Actinobacteria;Actinobacteria;AKIW543;AKIW543_unclassified;AKIW543_unclassified;AKIW543_unclassified;AKIW543_unclassified;.1
174	Actinobacteria;Actinobacteria;AKIW543;AKIW543_unclassified;AKIW543_unclassified;AKIW543_unclassified;AKIW543_unclassified;.10
175	Actinobacteria;Actinobacteria;AKIW543;AKIW543_unclassified;AKIW543_unclassified;AKIW543_unclassified;AKIW543_unclassified;.11
176	Actinobacteria;Actinobacteria;AKIW543;AKIW543_unclassified;AKIW543_unclassified;AKIW543_unclassified;AKIW543_unclassified;.12
177	Actinobacteria;Actinobacteria;AKIW543;AKIW543_unclassified;AKIW543_unclassified;AKIW543_unclassified;AKIW543_unclassified;.13
178	Actinobacteria;Actinobacteria;AKIW543;AKIW543_unclassified;AKIW543_unclassified;AKIW543_unclassified;AKIW543_unclassified;.14
179	Actinobacteria;Actinobacteria;AKIW543;AKIW543_unclassified;AKIW543_unclassified;AKIW543_unclassified;AKIW543_unclassified;.16
180	Actinobacteria;Actinobacteria;AKIW543;AKIW543_unclassified;AKIW543_unclassified;AKIW543_unclassified;AKIW543_unclassified;.17
181	Actinobacteria;Actinobacteria;AKIW543;AKIW543_unclassified;AKIW543_unclassified;AKIW543_unclassified;AKIW543_unclassified;.19
182	Actinobacteria;Actinobacteria;AKIW543;AKIW543_unclassified;AKIW543_unclassified;AKIW543_unclassified;AKIW543_unclassified;.2
183	Actinobacteria;Actinobacteria;AKIW543;AKIW543_unclassified;AKIW543_unclassified;AKIW543_unclassified;AKIW543_unclassified;.22
184	Actinobacteria;Actinobacteria;AKIW543;AKIW543_unclassified;AKIW543_unclassified;AKIW543_unclassified;AKIW543_unclassified;.25
185	Actinobacteria;Actinobacteria;AKIW543;AKIW543_unclassified;AKIW543_unclassified;AKIW543_unclassified;AKIW543_unclassified;.3
186	Actinobacteria;Actinobacteria;AKIW543;AKIW543_unclassified;AKIW543_unclassified;AKIW543_unclassified;AKIW543_unclassified;.33
187	Actinobacteria;Actinobacteria;AKIW543;AKIW543_unclassified;AKIW543_unclassified;AKIW543_unclassified;AKIW543_unclassified;.4
188	Actinobacteria;Actinobacteria;AKIW543;AKIW543_unclassified;AKIW543_unclassified;AKIW543_unclassified;AKIW543_unclassified;.40
189	Actinobacteria;Actinobacteria;AKIW543;AKIW543_unclassified;AKIW543_unclassified;AKIW543_unclassified;AKIW543_unclassified;.5
190	Actinobacteria;Actinobacteria;AKIW543;AKIW543_unclassified;AKIW543_unclassified;AKIW543_unclassified;AKIW543_unclassified;.6
191	Actinobacteria;Actinobacteria;AKIW543;AKIW543_unclassified;AKIW543_unclassified;AKIW543_unclassified;AKIW543_unclassified;.7
192	Actinobacteria;Actinobacteria;AKIW543;AKIW543_unclassified;AKIW543_unclassified;AKIW543_unclassified;AKIW543_unclassified;.8
193	Actinobacteria;Actinobacteria;AKIW543;AKIW543_unclassified;AKIW543_unclassified;AKIW543_unclassified;AKIW543_unclassified;.9
194	Actinobacteria;Actinobacteria;Coriobacteriales;Coriobacteriaceae;Uncultured_10;Uncultured_10_unclassified;Uncultured_10_unclassified;
195	Actinobacteria;Actinobacteria;Coriobacteriales;Coriobacteriaceae;Uncultured_10;Uncultured_10_unclassified;Uncultured_10_unclassified;.1
196	Actinobacteria;Actinobacteria;Coriobacteriales;Coriobacteriaceae;Uncultured_10;Uncultured_10_unclassified;Uncultured_10_unclassified;
197	Actinobacteria;Actinobacteria;Corynebacteriales;Corynebacteriaceae;Corynebacterium_1;Corynebacterium_1_unclassified;Corynebacterium_1_unclassified;
198	Actinobacteria;Actinobacteria;Corynebacteriales;Corynebacteriales_unclassified;Corynebacteriales_unclassified;Corynebacteriales_unclassified;Corynebacteriales_unclassified;
199	Actinobacteria;Actinobacteria;Corynebacteriales;Mycobacteriaceae;Mycobacterium;Mycobacterium_unclassified;Mycobacterium_unclassified;
200	Actinobacteria;Actinobacteria;Corynebacteriales;Mycobacteriaceae;Mycobacterium;Mycobacterium_unclassified;Mycobacterium_unclassified;.1
201	Actinobacteria;Actinobacteria;Corynebacteriales;Nocardiaceae_1;Gordonia;Gordonia_unclassified;Gordonia_unclassified;
202	Actinobacteria;Actinobacteria;Corynebacteriales;Nocardiaceae;Rhodococcus_1;Rhodococcus_1_unclassified;Rhodococcus_1_unclassified;
203	Actinobacteria;Actinobacteria;Frankiales;Acidothermaceae;Acidothermus;Acidothermus_unclassified;Acidothermus_unclassified;.1
204	Actinobacteria;Actinobacteria;Frankiales;Nakamurellaceae;Nakamurella;Nakamurella_unclassified;Nakamurella_unclassified;
205	Actinobacteria;Actinobacteria;Frankiales;Nakamurellaceae;Humicoccus;Humicoccus_unclassified;Humicoccus_unclassified;
206	Actinobacteria;Actinobacteria;MB-A2-108;MB-A2-108_unclassified;MB-A2-108_unclassified;MB-A2-108_unclassified;MB-A2-108_unclassified;
207	Actinobacteria;Actinobacteria;MB-A2-108;MB-A2-108_unclassified;MB-A2-108_unclassified;MB-A2-108_unclassified;MB-A2-108_unclassified;.1
208	Actinobacteria;Actinobacteria;MB-A2-108;MB-A2-108_unclassified;MB-A2-108_unclassified;MB-A2-108_unclassified;MB-A2-108_unclassified;.14
209	Actinobacteria;Actinobacteria;MB-A2-108;MB-A2-108_unclassified;MB-A2-108_unclassified;MB-A2-108_unclassified;MB-A2-108_unclassified;.2
210	Actinobacteria;Actinobacteria;MB-A2-108;MB-A2-108_unclassified;MB-A2-108_unclassified;MB-A2-108_unclassified;MB-A2-108_unclassified;.3
211	Actinobacteria;Actinobacteria;MB-A2-108;MB-A2-108_unclassified;MB-A2-108_unclassified;MB-A2-108_unclassified;MB-A2-108_unclassified;.4
212	Actinobacteria;Actinobacteria;MB-A2-108;MB-A2-108_unclassified;MB-A2-108_unclassified;MB-A2-108_unclassified;MB-A2-108_unclassified;.5
213	Actinobacteria;Actinobacteria;MB-A2-108;MB-A2-108_unclassified;MB-A2-108_unclassified;MB-A2-108_unclassified;MB-A2-108_unclassified;.8
214	Actinobacteria;Actinobacteria;Micrococcales_1;Brevibacteriaceae;Brevibacterium;Brevibacterium_unclassified;Brevibacterium_unclassified;
215	Actinobacteria;Actinobacteria;Micrococcales_1;Micrococcaceae;Arthrobacter_14;Arthrobacter_14_unclassified;Arthrobacter_14_unclassified;
216	Actinobacteria;Actinobacteria;Micrococcales_3;Cellulomonadaceae;Cellulomonadaceae_unclassified;Cellulomonadaceae_unclassified;Cellulomonadaceae_unclassified;
217	Actinobacteria;Actinobacteria;Micrococcales_3;Microbacteriaceae;Leucobacter;Leucobacter_unclassified;Leucobacter_unclassified;
218	Actinobacteria;Actinobacteria;Micrococcales_3;Microbacteriaceae;Leucobacter;Leucobacter_unclassified;Leucobacter_unclassified;
219	Actinobacteria;Actinobacteria;Micrococcales_3;Microbacteriaceae;Microbacterium;Microbacterium_unclassified;Microbacterium_unclassified;
220	Actinobacteria;Actinobacteria;Micrococcales_4;Intrasporangiaceae_1;Intrasporangiaceae_1_unclassified;Intrasporangiaceae_1_unclassified;Intrasporangiaceae_1_unclassified;
221	Actinobacteria;Actinobacteria;Micromonosporales;Micromonosporaceae;Micromonosporaceae_unclassified;Micromonosporaceae_unclassified;Micromonosporaceae_unclassified;
222	Actinobacteria;Actinobacteria;Micromonosporales;Micromonosporaceae;Micromonosporaceae_unclassified;Micromonosporaceae_unclassified;Micromonosporaceae_unclassified;
223	Actinobacteria;Actinobacteria;Micromonosporales;Micromonosporaceae;Micromonosporaceae_unclassified;Micromonosporaceae_unclassified;Micromonosporaceae_unclassified;
224	Actinobacteria;Actinobacteria;PeM15;PeM15_unclassified;PeM15_unclassified;PeM15_unclassified;PeM15_unclassified;
225	Actinobacteria;Actinobacteria;Propionibacteriales;Nocardioidaceae;Marmoricola;Marmoricola_unclassified;Marmoricola_unclassified;
226	Actinobacteria;Actinobacteria;Propionibacteriales;Nocardioidaceae;Nocardioides;Nocardioides_unclassified;Nocardioides_unclassified;
227	Actinobacteria;Actinobacteria;Propionibacteriales;Nocardioidaceae;Nocardioides;Nocardioides_unclassified;Nocardioides_unclassified;.8
228	Actinobacteria;Actinobacteria;Pseudonocardiales_2;Pseudonocardiaceae_2;Pseudonocardia;Pseudonocardia_unclassified;Pseudonocardia_unclassified;.1
229	Actinobacteria;Actinobacteria;Pseudonocardiales_2;Pseudonocardiaceae_2;Pseudonocardia;Pseudonocardia_unclassified;Pseudonocardia_unclassified;.2
230	Actinobacteria;Actinobacteria;Pseudonocardiales_2;Pseudonocardiaceae_2;Pseudonocardia;Pseudonocardia_unclassified;Pseudonocardia_unclassified;.3
231	Actinobacteria;Actinobacteria;Solirubrobacterales;Cluster_319-6M6;Cluster_319-6M6_unclassified;Cluster_319-6M6_unclassified;Cluster_319-6M6_unclassified;.1
232	Actinobacteria;Actinobacteria;Solirubrobacterales;Cluster_480-2;Cluster_480-2_unclassified;Cluster_480-2_unclassified;Cluster_480-2_unclassified;
233	Actinobacteria;Actinobacteria;Solirubrobacterales;Cluster_480-2;Cluster_480-2_unclassified;Cluster_480-2_unclassified;Cluster_480-2_unclassified;.1
234	Actinobacteria;Actinobacteria;Solirubrobacterales;Patulibacteraceae;Patulibacter;Patulibacter_unclassified;Patulibacter_unclassified;
235	Actinobacteria;Actinobacteria;Solirubrobacterales;Patulibacteraceae;Patulibacter;Patulibacter_unclassified;Patulibacter_unclassified;.2
236	Actinobacteria;Actinobacteria;Solirubrobacterales;Solirubrobacteriaceae;Solirubrobacter;Solirubrobacter_unclassified;Solirubrobacter_unclassified;
237	Actinobacteria;Actinobacteria;Solirubrobacterales;TM146;TM146_unclassified;TM146_unclassified;TM146_unclassified;
238	Armatimonadetes;Armatimonadetes_unclassified;Armatimonadetes_unclassified;Armatimonadetes_unclassified;Armatimonadetes_unclassified;Armatimonadetes_unclassified;Armatimonadetes_unclassified;.29
239	Bacteroidetes;Bacteroidetes_unclassified;Bacteroidetes_unclassified;Bacteroidetes_unclassified;Bacteroidetes_unclassified;Bacteroidetes_unclassified;Bacteroidetes_unclassified;
240	Bacteroidetes;Bacteroidetes_unclassified;Bacteroidetes_unclassified;Bacteroidetes_unclassified;Bacteroidetes_unclassified;Bacteroidetes_unclassified;Bacteroidetes_unclassified;.3
241	Bacteroidetes;Bacteroidetes_unclassified;Bacteroidetes_unclassified;Bacteroidetes_unclassified;Bacteroidetes_unclassified;Bacteroidetes_unclassified;Bacteroidetes_unclassified;.5
242	Bacteroidetes;Bacteroidetes_unclassified;Bacteroidetes_unclassified;Bacteroidetes_unclassified;Bacteroidetes_unclassified;Bacteroidetes_unclassified;Bacteroidetes_unclassified;.53
243	Bacteroidetes;Bacteroidetes_unclassified;Bacteroidetes_unclassified;Bacteroidetes_unclassified;Bacteroidetes_unclassified;Bacteroidetes_unclassified;Bacteroidetes_unclassified;.57
244	Bacteroidetes;Bacteroidetes_unclassified;Bacteroidetes_unclassified;Bacteroidetes_unclassified;Bacteroidetes_unclassified;Bacteroidetes_unclassified;Bacteroidetes_unclassified;.61
245	Bacteroidetes;Bacteroidetes_unclassified;Bacteroidetes_unclassified;Bacteroidetes_unclassified;Bacteroidetes_unclassified;Bacteroidetes_unclassified;Bacteroidetes_unclassified;.71
246	Bacteroidetes;Bacteroidetes_unclassified;Bacteroidetes_unclassified;Bacteroidetes_unclassified;Bacteroidetes_unclassified;Bacteroidetes_unclassified;Bacteroidetes_unclassified;.79
247	Bacteroidetes;Bacteroidia;Bacteroidales;Bacteroidaceae;Bacteroides;Bacteroides_unclassified;Bacteroides_unclassified;
248	Bacteroidetes;Bacteroidia;Bacteroidales;Bacteroidaceae;Bacteroides;Bacteroides_unclassified;Bacteroides_unclassified;.1
249	Bacteroidetes;Bacteroidia;Bacteroidales;Bacteroidaceae;Bacteroides;Bacteroides_unclassified;Bacteroides_unclassified;.12
250	Bacteroidetes;Bacteroidia;Bacteroidales;Bacteroidaceae;Bacteroides;Bacteroides_unclassified;Bacteroides_unclassified;.13
251	Bacteroidetes;Bacteroidia;Bacteroidales;Bacteroidaceae;Bacteroides;Bacteroides_unclassified;Bacteroides_unclassified;.14*
252	Bacteroidetes;Bacteroidia;Bacteroidales;Bacteroidaceae;Bacteroides;Bacteroides_unclassified;Bacteroides_unclassified;.2
253	Bacteroidetes;Bacteroidia;Bacteroidales;Bacteroidaceae;Bacteroides;Bacteroides_unclassified;Bacteroides_unclassified;.5
254	Bacteroidetes;Bacteroidia;Bacteroidales;Bacteroidaceae;Bacteroides;Bacteroides_unclassified;Bacteroides_unclassified;.6
255	Bacteroidetes;Bacteroidia;Bacteroidales;Bacteroidaceae;Bacteroides;Bacteroides_unclassified;Bacteroides_unclassified;.63
256	Bacteroidetes;Bacteroidia;Bacteroidales;Bacteroidaceae;Bacteroides;Bacteroides_unclassified;Bacteroides_unclassified;.7
257	Bacteroidetes;Bacteroidia;Bacteroidales;Bacteroidaceae;Bacteroides;Bacteroides_unclassified;Bacteroides_unclassified;.71
258	Bacteroidetes;Bacteroidia;Bacteroidales;Bacteroidaceae;Bacteroides;Bacteroides_unclassified;Bacteroides_unclassified;
259	Bacteroidetes;Bacteroidia;Bacteroidales;Bacteroidales_unclassified;Bacteroidales_unclassified;Bacteroidales_unclassified;Bacteroidales_unclassified;.1
260	Bacteroidetes;Bacteroidia;Bacteroidales;Bacteroidales_unclassified;Bacteroidales_unclassified;Bacteroidales_unclassified;Bacteroidales_unclassified;.102
261	Bacteroidetes;Bacteroidia;Bacteroidales;Bacteroidales_unclassified;Bacteroidales_unclassified;Bacteroidales_unclassified;Bacteroidales_unclassified;.38
262	Bacteroidetes;Bacteroidia;Bacteroidales;Bacteroidales_unclassified;Bacteroidales_unclassified;Bacteroidales_unclassified;Bacteroidales_unclassified;.4
263	Bacteroidetes;Bacteroidia;Bacteroidales;Bacteroidales_unclassified;Bacteroidales_unclassified;Bacteroidales_unclassified;Bacteroidales_unclassified;.84
264	Bacteroidetes;Bacteroidia;Bacteroidales;Bacteroidales_unclassified;Bacteroidales_unclassified;Bacteroidales_unclassified;Bacteroidales_unclassified;
265	Bacteroidetes;Bacteroidia;Bacteroidales;Bacteroidales_unclassified;Bacteroidales_unclassified;Bacteroidales_unclassified;Bacteroidales_unclassified;
266	Bacteroidetes;Bacteroidia;Bacteroidales;Marinilabiaceae;Uncultured_1;Uncultured_1_unclassified;Uncultured_1_unclassified;.1
267	Bacteroidetes;Bacteroidia;Bacteroidales;Marinilabiaceae;Uncultured_1;Uncultured_1_unclassified;Uncultured_1_unclassified;.4
268	Bacteroidetes;Bacteroidia;Bacteroidales;Porphyromonadaceae_1;Dysgonomonas;Dysgonomonas_unclassified;Dysgonomonas_unclassified;
269	Bacteroidetes;Bacteroidia;Bacteroidales;Porphyromonadaceae_1;Dysgonomonas;Dysgonomonas_unclassified;Dysgonomonas_unclassified;.19
270	Bacteroidetes;Bacteroidia;Bacteroidales;Porphyromonadaceae_1;Dysgonomonas;Dysgonomonas_unclassified;Dysgonomonas_unclassified;.2
271	Bacteroidetes;Bacteroidia;Bacteroidales;Porphyromonadaceae_1;Dysgonomonas;Dysgonomonas_unclassified;Dysgonomonas_unclassified;.28
272	Bacteroidetes;Bacteroidia;Bacteroidales;Porphyromonadaceae_1;Dysgonomonas;Dysgonomonas_unclassified;Dysgonomonas_unclassified;.3
273	Bacteroidetes;Bacteroidia;Bacteroidales;Porphyromonadaceae_1;Dysgonomonas;Dysgonomonas_unclassified;Dysgonomonas_unclassified;.38
274	Bacteroidetes;Bacteroidia;Bacteroidales;Porphyromonadaceae_1;Dysgonomonas;Dysgonomonas_unclassified;Dysgonomonas_unclassified;.48
275	Bacteroidetes;Bacteroidia;Bacteroidales;Porphyromonadaceae_1;Dysgonomonas;Dysgonomonas_unclassified;Dysgonomonas_unclassified;.56
276	Bacteroidetes;Bacteroidia;Bacteroidales;Porphyromonadaceae_1;Dysgonomonas;Dysgonomonas_unclassified;Dysgonomonas_unclassified;.76
277	Bacteroidetes;Bacteroidia;Bacteroidales;Porphyromonadaceae_1;Dysgonomonas;Dysgonomonas_unclassified;Dysgonomonas_unclassified;
278	Bacteroidetes;Bacteroidia;Bacteroidales;Porphyromonadaceae_2;Porphyromonadaceae_2_unclassified;Porphyromonadaceae_2_unclassified;Porphyromonadaceae_2_unclassified;
279	Bacteroidetes;Bacteroidia;Bacteroidales;Porphyromonadaceae_2;Porphyromonadaceae_2_unclassified;Porphyromonadaceae_2_unclassified;Porphyromonadaceae_2_unclassified;
280	Bacteroidetes;Bacteroidia;Bacteroidales;Porphyromonadaceae_2;Termite_cluster_3;Termite_cluster_3_unclassified;Termite_cluster_3_unclassified;
281	Bacteroidetes;Bacteroidia;Bacteroidales;Porphyromonadaceae_2;Termite_cluster_3;Termite_cluster_3_unclassified;Termite_cluster_3_unclassified;.12
282	Bacteroidetes;Bacteroidia;Bacteroidales;Porphyromonadaceae_3;Cluster_IV;Cluster_IV_unclassified;Cluster_IV_unclassified;.10
283	Bacteroidetes;Bacteroidia;Bacteroidales;Porphyromonadaceae_3;Cluster_IV;Cluster_IV_unclassified;Cluster_IV_unclassified;.4
284	Bacteroidetes;Bacteroidia;Bacteroidales;Porphyromonadaceae_3;Cluster_IV;Cluster_IV_unclassified;Cluster_IV_unclassified;.5
285	Bacteroidetes;Bacteroidia;Bacteroidales;Porphyromonadaceae_3;Cluster_IV;Cluster_IV_unclassified;Cluster_IV_unclassified;.8
286	Bacteroidetes;Bacteroidia;Bacteroidales;Porphyromonadaceae_3;Cluster_IV;Cluster_IV_unclassified;Cluster_IV_unclassified;
287	Bacteroidetes;Bacteroidia;Bacteroidales;Porphyromonadaceae_3;Cluster_IV;Cluster_IV_unclassified;Cluster_IV_unclassified;
288	Bacteroidetes;Bacteroidia;Bacteroidales;Porphyromonadaceae_3;Parabacteroides;Parabacteroides_unclassified;Parabacteroides_unclassified;.1
289	Bacteroidetes;Bacteroidia;Bacteroidales;Porphyromonadaceae_3;Porphyromonadaceae_3_unclassified;Porphyromonadaceae_3_unclassified;Porphyromonadaceae_3_unclassified;
290	Bacteroidetes;Bacteroidia;Bacteroidales;Porphyromonadaceae_3;Porphyromonadaceae_3_unclassified;Porphyromonadaceae_3_unclassified;Porphyromonadaceae_3_unclassified;.1
291	Bacteroidetes;Bacteroidia;Bacteroidales;Porphyromonadaceae_3;Porphyromonadaceae_3_unclassified;Porphyromonadaceae_3_unclassified;Porphyromonadaceae_3_unclassified;.10
292	Bacteroidetes;Bacteroidia;Bacteroidales;Porphyromonadaceae_3;Porphyromonadaceae_3_unclassified;Porphyromonadaceae_3_unclassified;Porphyromonadaceae_3_unclassified;.2
293	Bacteroidetes;Bacteroidia;Bacteroidales;Porphyromonadaceae_3;Porphyromonadaceae_3_unclassified;Porphyromonadaceae_3_unclassified;Porphyromonadaceae_3_unclassified;.3
294	Bacteroidetes;Bacteroidia;Bacteroidales;Porphyromonadaceae_3;Porphyromonadaceae_3_unclassified;Porphyromonadaceae_3_unclassified;Porphyromonadaceae_3_unclassified;.49
295	Bacteroidetes;Bacteroidia;Bacteroidales;Porphyromonadaceae_3;Porphyromonadaceae_3_unclassified;Porphyromonadaceae_3_unclassified;Porphyromonadaceae_3_unclassified;.6
296	Bacteroidetes;Bacteroidia;Bacteroidales;Porphyromonadaceae_3;Porphyromonadaceae_3_unclassified;Porphyromonadaceae_3_unclassified;Porphyromonadaceae_3_unclassified;
297	Bacteroidetes;Bacteroidia;Bacteroidales;Porphyromonadaceae_3;Porphyromonadaceae_3_unclassified;Porphyromonadaceae_3_unclassified;Porphyromonadaceae_3_unclassified;
298	Bacteroidetes;Bacteroidia;Bacteroidales;Porphyromonadaceae_3;Porphyromonadaceae_3_unclassified;Porphyromonadaceae_3_unclassified;Porphyromonadaceae_3_unclassified;
299	Bacteroidetes;Bacteroidia;Bacteroidales;Porphyromonadaceae_3;Porphyromonadaceae_3_unclassified;Porphyromonadaceae_3_unclassified;Porphyromonadaceae_3_unclassified;
300	Bacteroidetes;Bacteroidia;Bacteroidales;Porphyromonadaceae_3;Porphyromonadaceae_3_unclassified;Porphyromonadaceae_3_unclassified;Porphyromonadaceae_3_unclassified;.1
301	Bacteroidetes;Bacteroidia;Bacteroidales;Porphyromonadaceae_3;Porphyromonadaceae_3_unclassified;Porphyromonadaceae_3_unclassified;Porphyromonadaceae_3_unclassified;
302	Bacteroidetes;Bacteroidia;Bacteroidales;Porphyromonadaceae_3;Porphyromonadaceae_3_unclassified;Porphyromonadaceae_3_unclassified;Porphyromonadaceae_3_unclassified;
303	Bacteroidetes;Bacteroidia;Bacteroidales;Porphyromonadaceae_3;Porphyromonadaceae_3_unclassified;Porphyromonadaceae_3_unclassified;Porphyromonadaceae_3_unclassified;
304	Bacteroidetes;Bacteroidia;Bacteroidales;Porphyromonadaceae_3;Tannerella;Tannerella_unclassified;Tannerella_unclassified;
305	Bacteroidetes;Bacteroidia;Bacteroidales;Porphyromonadaceae_3;Tannerella;Tannerella_unclassified;Tannerella_unclassified;.1
306	Bacteroidetes;Bacteroidia;Bacteroidales;Porphyromonadaceae_3;Tannerella;Tannerella_unclassified;Tannerella_unclassified;
307	Bacteroidetes;Bacteroidia;Bacteroidales;Porphyromonadaceae_6;Odoribacter;Odoribacter_unclassified;Odoribacter_unclassified;
308	Bacteroidetes;Bacteroidia;Bacteroidales;Porphyromonadaceae_6;Odoribacter;Odoribacter_unclassified;Odoribacter_unclassified;.1
309	Bacteroidetes;Bacteroidia;Bacteroidales;Porphyromonadaceae_Cluster_V;Cockroach_cluster;Cockroach_cluster_unclassified;Cockroach_cluster_unclassified;
310	Bacteroidetes;Bacteroidia;Bacteroidales;Porphyromonadaceae_Cluster_V;Cockroach_cluster;Cockroach_cluster_unclassified;Cockroach_cluster_unclassified;.13
311	Bacteroidetes;Bacteroidia;Bacteroidales;Porphyromonadaceae_Cluster_V;Cockroach_cluster;Cockroach_cluster_unclassified;Cockroach_cluster_unclassified;.4
312	Bacteroidetes;Bacteroidia;Bacteroidales;Porphyromonadaceae_Cluster_V;Cockroach_cluster;Cockroach_cluster_unclassified;Cockroach_cluster_unclassified;
313	Bacteroidetes;Bacteroidia;Bacteroidales;Porphyromonadaceae_Cluster_V;Porphyromonadaceae_Cluster_V_unclassified;Porphyromonadaceae_Cluster_V_unclassified;Porphyromonadaceae_Cluster_V_unclassified;.11
314	Bacteroidetes;Bacteroidia;Bacteroidales;Porphyromonadaceae_Cluster_V;Porphyromonadaceae_Cluster_V_unclassified;Porphyromonadaceae_Cluster_V_unclassified;Porphyromonadaceae_Cluster_V_unclassified;.13
315	Bacteroidetes;Bacteroidia;Bacteroidales;Porphyromonadaceae_Cluster_V;Porphyromonadaceae_Cluster_V_unclassified;Porphyromonadaceae_Cluster_V_unclassified;Porphyromonadaceae_Cluster_V_unclassified;.27
316	Bacteroidetes;Bacteroidia;Bacteroidales;Porphyromonadaceae_Cluster_V;Porphyromonadaceae_Cluster_V_unclassified;Porphyromonadaceae_Cluster_V_unclassified;Porphyromonadaceae_Cluster_V_unclassified;.5
317	Bacteroidetes;Bacteroidia;Bacteroidales;Porphyromonadaceae_Cluster_V;Porphyromonadaceae_Cluster_V_unclassified;Porphyromonadaceae_Cluster_V_unclassified;Porphyromonadaceae_Cluster_V_unclassified;.60
318	Bacteroidetes;Bacteroidia;Bacteroidales;Porphyromonadaceae_Cluster_V;Porphyromonadaceae_Cluster_V_unclassified;Porphyromonadaceae_Cluster_V_unclassified;Porphyromonadaceae_Cluster_V_unclassified;
319	Bacteroidetes;Bacteroidia;Bacteroidales;Porphyromonadaceae_Cluster_V;Porphyromonadaceae_Cluster_V_unclassified;Porphyromonadaceae_Cluster_V_unclassified;Porphyromonadaceae_Cluster_V_unclassified;.1
320	Bacteroidetes;Bacteroidia;Bacteroidales;Porphyromonadaceae_Cluster_V;Termite_Cockroach_cluster;Termite_Cockroach_cluster_unclassified;Termite_Cockroach_cluster_unclassified;.1
321	Bacteroidetes;Bacteroidia;Bacteroidales;Porphyromonadaceae_Cluster_V;Termite_Cockroach_cluster;Termite_Cockroach_cluster_unclassified;Termite_Cockroach_cluster_unclassified;.3
322	Bacteroidetes;Bacteroidia;Bacteroidales;Porphyromonadaceae_Cluster_V;Termite_Cockroach_cluster;Termite_Cockroach_cluster_unclassified;Termite_Cockroach_cluster_unclassified;
323	Bacteroidetes;Bacteroidia;Bacteroidales;Porphyromonadaceae_Gut_group;Butyricimonas;Butyricimonas_unclassified;Butyricimonas_unclassified;
324	Bacteroidetes;Bacteroidia;Bacteroidales;Porphyromonadaceae_Gut_group;Butyricimonas;Butyricimonas_unclassified;Butyricimonas_unclassified;.2
325	Bacteroidetes;Bacteroidia;Bacteroidales;Porphyromonadaceae_Gut_group;Mixed_gut_cluster;Mixed_gut_cluster_unclassified;Mixed_gut_cluster_unclassified;
326	Bacteroidetes;Bacteroidia;Bacteroidales;Porphyromonadaceae_Gut_group;Mixed_gut_cluster;Mixed_gut_cluster_unclassified;Mixed_gut_cluster_unclassified;.1
327	Bacteroidetes;Bacteroidia;Bacteroidales;Porphyromonadaceae_Gut_group;Mixed_gut_cluster;Mixed_gut_cluster_unclassified;Mixed_gut_cluster_unclassified;.2
328	Bacteroidetes;Bacteroidia;Bacteroidales;Porphyromonadaceae_Gut_group;Mixed_gut_cluster;Mixed_gut_cluster_unclassified;Mixed_gut_cluster_unclassified;.3
329	Bacteroidetes;Bacteroidia;Bacteroidales;Porphyromonadaceae_Gut_group;Mixed_gut_cluster;Mixed_gut_cluster_unclassified;Mixed_gut_cluster_unclassified;.6
330	Bacteroidetes;Bacteroidia;Bacteroidales;Porphyromonadaceae_Gut_group;Mixed_gut_cluster;Mixed_gut_cluster_unclassified;Mixed_gut_cluster_unclassified;.8
331	Bacteroidetes;Bacteroidia;Bacteroidales;Porphyromonadaceae_Gut_group;Termite_cluster_I;Termite_cluster_I_unclassified;Termite_cluster_I_unclassified;
332	Bacteroidetes;Bacteroidia;Bacteroidales;Porphyromonadaceae_Gut_group;Termite_cluster_I;Termite_cluster_I_unclassified;Termite_cluster_I_unclassified;.1
333	Bacteroidetes;Bacteroidia;Bacteroidales;Porphyromonadaceae_Gut_group;Termite_cluster_III;Termite_cluster_III_unclassified;Termite_cluster_III_unclassified;*
334	Bacteroidetes;Bacteroidia;Bacteroidales;Porphyromonadaceae_Gut_group;Termite_cluster_III;Termite_cluster_III_unclassified;Termite_cluster_III_unclassified;.1
335	Bacteroidetes;Bacteroidia;Bacteroidales;Rikenellaceae;Alisitpes_IV;Alisitpes_IV_unclassified;Alisitpes_IV_unclassified;
336	Bacteroidetes;Bacteroidia;Bacteroidales;Rikenellaceae;Alisitpes_IV;Alisitpes_IV_unclassified;Alisitpes_IV_unclassified;.1
337	Bacteroidetes;Bacteroidia;Bacteroidales;Rikenellaceae;Alisitpes_IV;Alisitpes_IV_unclassified;Alisitpes_IV_unclassified;.13
338	Bacteroidetes;Bacteroidia;Bacteroidales;Rikenellaceae;Alisitpes_IV;Alisitpes_IV_unclassified;Alisitpes_IV_unclassified;.16
339	Bacteroidetes;Bacteroidia;Bacteroidales;Rikenellaceae;Alisitpes_IV;Alisitpes_IV_unclassified;Alisitpes_IV_unclassified;.2
340	Bacteroidetes;Bacteroidia;Bacteroidales;Rikenellaceae;Alisitpes_IV;Alisitpes_IV_unclassified;Alisitpes_IV_unclassified;.20
341	Bacteroidetes;Bacteroidia;Bacteroidales;Rikenellaceae;Alisitpes_IV;Alisitpes_IV_unclassified;Alisitpes_IV_unclassified;.3
342	Bacteroidetes;Bacteroidia;Bacteroidales;Rikenellaceae;Alisitpes_IV;Alisitpes_IV_unclassified;Alisitpes_IV_unclassified;.56
343	Bacteroidetes;Bacteroidia;Bacteroidales;Rikenellaceae;Alisitpes_IV;Alisitpes_IV_unclassified;Alisitpes_IV_unclassified;.8
344	Bacteroidetes;Bacteroidia;Bacteroidales;Rikenellaceae;Alisitpes_IV;Alisitpes_IV_unclassified;Alisitpes_IV_unclassified;.9
345	Bacteroidetes;Bacteroidia;Bacteroidales;Rikenellaceae;Alisitpes_IV;Alisitpes_IV_unclassified;Alisitpes_IV_unclassified;
346	Bacteroidetes;Bacteroidia;Bacteroidales;Rikenellaceae;Alisitpes_IV;Alisitpes_IV_unclassified;Alisitpes_IV_unclassified;
347	Bacteroidetes;Bacteroidia;Bacteroidales;Rikenellaceae;Alistipes_III;Alistipes_III_unclassified;Alistipes_III_unclassified;
348	Bacteroidetes;Bacteroidia;Bacteroidales;Rikenellaceae;Alistipes_III;Alistipes_III_unclassified;Alistipes_III_unclassified;.21
349	Bacteroidetes;Bacteroidia;Bacteroidales;Rikenellaceae;gut_cluster_c;gut_cluster_c_unclassified;gut_cluster_c_unclassified;
350	Bacteroidetes;Bacteroidia;Bacteroidales;Rikenellaceae;RC9_gut_group;RC9_gut_group_unclassified;RC9_gut_group_unclassified;.1
351	Bacteroidetes;Bacteroidia;Bacteroidales;Rikenellaceae;RC9_gut_group;RC9_gut_group_unclassified;RC9_gut_group_unclassified;.3
352	Bacteroidetes;Bacteroidia;Bacteroidales;Rikenellaceae;RC9_gut_group;RC9_gut_group_unclassified;RC9_gut_group_unclassified;.9
353	Bacteroidetes;Bacteroidia;Bacteroidales;Rikenellaceae;Rikenellaceae_unclassified;Rikenellaceae_unclassified;Rikenellaceae_unclassified;
354	Bacteroidetes;Bacteroidia;Bacteroidales;Rikenellaceae;Rikenellaceae_unclassified;Rikenellaceae_unclassified;Rikenellaceae_unclassified;.125
355	Bacteroidetes;Bacteroidia;Bacteroidales;Rikenellaceae;Rikenellaceae_unclassified;Rikenellaceae_unclassified;Rikenellaceae_unclassified;.27
356	Bacteroidetes;Bacteroidia;Bacteroidales;Rikenellaceae;Rikenellaceae_unclassified;Rikenellaceae_unclassified;Rikenellaceae_unclassified;
357	Bacteroidetes;Bacteroidia;Bacteroidales;Rikenellaceae;Rikenella_1;Rikenella_1_unclassified;Rikenella_1_unclassified;
358	Bacteroidetes;Bacteroidia;Bacteroidales;Rikenellaceae;Rikenellaceae_unclassified;Rikenellaceae_unclassified;Rikenellaceae_unclassified;
359	Bacteroidetes;Flavobacteria;Flavobacteriales;Flavobacteriaceae_1;Flavobacterium_1;Flavobacterium_1_unclassified;Flavobacterium_1_unclassified;
360	Bacteroidetes;Flavobacteria;Flavobacteriales;Flavobacteriaceae_1;Flavobacterium_1;Flavobacterium_1_unclassified;Flavobacterium_1_unclassified;.2
361	Bacteroidetes;Flavobacteria;Flavobacteriales;Flavobacteriaceae_1;Flavobacterium_1;Flavobacterium_1_unclassified;Flavobacterium_1_unclassified;.3
362	Bacteroidetes;Flavobacteria;Flavobacteriales;Flavobacteriaceae_1;Myroides;Myroides_unclassified;Myroides_unclassified;
363	Bacteroidetes;Flavobacteria;Flavobacteriales;Flavobacteriaceae_1;Myroides;Myroides_unclassified;Myroides_unclassified;.1
364	Bacteroidetes;Flavobacteria;Flavobacteriales;Flavobacteriaceae_1;Myroides;Myroides_unclassified;Myroides_unclassified;.2
365	Bacteroidetes;Flavobacteria;Flavobacteriales;Flavobacteriales_unclassified;Flavobacteriales_unclassified;Flavobacteriales_unclassified;Flavobacteriales_unclassified;
366	Bacteroidetes;Flavobacteria;Flavobacteriales;NS9_marine_group;NS9_marine_group_unclassified;NS9_marine_group_unclassified;NS9_marine_group_unclassified;
367	Bacteroidetes;Sphingobacteria;Sphingobacteria_unclassified;Sphingobacteria_unclassified;Sphingobacteria_unclassified;Sphingobacteria_unclassified;Sphingobacteria_unclassified;
368	Bacteroidetes;Sphingobacteria;Sphingobacteria_unclassified;Sphingobacteria_unclassified;Sphingobacteria_unclassified;Sphingobacteria_unclassified;Sphingobacteria_unclassified;.1
369	Bacteroidetes;Sphingobacteria;Sphingobacteria_unclassified;Sphingobacteria_unclassified;Sphingobacteria_unclassified;Sphingobacteria_unclassified;Sphingobacteria_unclassified;.2
370	Bacteroidetes;Sphingobacteria;Sphingobacteriales_1;env_OPS_17;env_OPS_17_unclassified;env_OPS_17_unclassified;env_OPS_17_unclassified;.1
371	Bacteroidetes;Sphingobacteria;Sphingobacteriales_1;env_OPS_17;env_OPS_17_unclassified;env_OPS_17_unclassified;env_OPS_17_unclassified;.10
372	Bacteroidetes;Sphingobacteria;Sphingobacteriales_1;NS11-12_marine_group;NS11-12_marine_group_unclassified;NS11-12_marine_group_unclassified;NS11-12_marine_group_unclassified;.2
373	Bacteroidetes;Sphingobacteria;Sphingobacteriales_1;PHOS-HE51;PHOS-HE51_unclassified;PHOS-HE51_unclassified;PHOS-HE51_unclassified;.1
374	Bacteroidetes;Sphingobacteria;Sphingobacteriales_1;Sphingobacteriaceae;Sphingobacteriaceae_unclassified;Sphingobacteriaceae_unclassified;Sphingobacteriaceae_unclassified;.1
375	Bacteroidetes;Sphingobacteria;Sphingobacteriales_1;Sphingobacteriales_1_unclassified;Sphingobacteriales_1_unclassified;Sphingobacteriales_1_unclassified;Sphingobacteriales_1_unclassified;
376	Bacteroidetes;Sphingobacteria;Sphingobacteriales_1;Sphingobacteriales_1_unclassified;Sphingobacteriales_1_unclassified;Sphingobacteriales_1_unclassified;Sphingobacteriales_1_unclassified;.3
377	Bacteroidetes;Sphingobacteria;Sphingobacteriales_1;Sphingobacteriales_1_unclassified;Sphingobacteriales_1_unclassified;Sphingobacteriales_1_unclassified;Sphingobacteriales_1_unclassified;.4
378	Bacteroidetes;Sphingobacteria;Sphingobacteriales_1;Sphingobacteriales_1_unclassified;Sphingobacteriales_1_unclassified;Sphingobacteriales_1_unclassified;Sphingobacteriales_1_unclassified;
379	Bacteroidetes;Sphingobacteria;Sphingobacteriales_1;Sphingobacteriales_1_unclassified;Sphingobacteriales_1_unclassified;Sphingobacteriales_1_unclassified;Sphingobacteriales_1_unclassified;
380	Bacteroidetes;Sphingobacteria;Sphingobacteriales_2;Chitinophagaceae;Chitinophaga;Chitinophaga_unclassified;Chitinophaga_unclassified;
381	Bacteroidetes;Sphingobacteria;Sphingobacteriales_2;Chitinophagaceae;Chitinophaga;Chitinophaga_unclassified;Chitinophaga_unclassified;.1
382	Bacteroidetes;Sphingobacteria;Sphingobacteriales_2;Chitinophagaceae;Chitinophagaceae_unclassified;Chitinophagaceae_unclassified;Chitinophagaceae_unclassified;
383	Bacteroidetes;Sphingobacteria;Sphingobacteriales_2;Chitinophagaceae;Chitinophagaceae_unclassified;Chitinophagaceae_unclassified;Chitinophagaceae_unclassified;.1
384	Bacteroidetes;Sphingobacteria;Sphingobacteriales_2;Chitinophagaceae;Chitinophagaceae_unclassified;Chitinophagaceae_unclassified;Chitinophagaceae_unclassified;.10
385	Bacteroidetes;Sphingobacteria;Sphingobacteriales_2;Chitinophagaceae;Chitinophagaceae_unclassified;Chitinophagaceae_unclassified;Chitinophagaceae_unclassified;.12
386	Bacteroidetes;Sphingobacteria;Sphingobacteriales_2;Chitinophagaceae;Chitinophagaceae_unclassified;Chitinophagaceae_unclassified;Chitinophagaceae_unclassified;.13
387	Bacteroidetes;Sphingobacteria;Sphingobacteriales_2;Chitinophagaceae;Chitinophagaceae_unclassified;Chitinophagaceae_unclassified;Chitinophagaceae_unclassified;.17
388	Bacteroidetes;Sphingobacteria;Sphingobacteriales_2;Chitinophagaceae;Chitinophagaceae_unclassified;Chitinophagaceae_unclassified;Chitinophagaceae_unclassified;.19
389	Bacteroidetes;Sphingobacteria;Sphingobacteriales_2;Chitinophagaceae;Chitinophagaceae_unclassified;Chitinophagaceae_unclassified;Chitinophagaceae_unclassified;.3
390	Bacteroidetes;Sphingobacteria;Sphingobacteriales_2;Chitinophagaceae;Chitinophagaceae_unclassified;Chitinophagaceae_unclassified;Chitinophagaceae_unclassified;.4
391	Bacteroidetes;Sphingobacteria;Sphingobacteriales_2;Chitinophagaceae;Chitinophagaceae_unclassified;Chitinophagaceae_unclassified;Chitinophagaceae_unclassified;.8
392	Bacteroidetes;Sphingobacteria;Sphingobacteriales_2;Chitinophagaceae;Chitinophagaceae_unclassified;Chitinophagaceae_unclassified;Chitinophagaceae_unclassified;
393	Bacteroidetes;Sphingobacteria;Sphingobacteriales_2;Chitinophagaceae;Chitinophagaceae_unclassified;Chitinophagaceae_unclassified;Chitinophagaceae_unclassified;
394	Bacteroidetes;Sphingobacteria;Sphingobacteriales_2;Chitinophagaceae;Chitinophagaceae_unclassified;Chitinophagaceae_unclassified;Chitinophagaceae_unclassified;
395	Bacteroidetes;Sphingobacteria;Sphingobacteriales_2;Chitinophagaceae;Chitinophagaceae_unclassified;Chitinophagaceae_unclassified;Chitinophagaceae_unclassified;
396	Bacteroidetes;Sphingobacteria;Sphingobacteriales_2;Chitinophagaceae;Terrimonas_2;Terrimonas_2_unclassified;Terrimonas_2_unclassified;
397	Bacteroidetes;Sphingobacteria;Sphingobacteriales_2;Chitinophagaceae;Uncultured_1;Uncultured_1_unclassified;Uncultured_1_unclassified;
398	Bacteroidetes;Sphingobacteria;Sphingobacteriales_2;Chitinophagaceae;Uncultured_1;Uncultured_1_unclassified;Uncultured_1_unclassified;
399	Bacteroidetes;Sphingobacteria;Sphingobacteriales_2;Chitinophagaceae;Uncultured_10;Uncultured_10_unclassified;Uncultured_10_unclassified;
400	Bacteroidetes;Sphingobacteria;Sphingobacteriales_2;Chitinophagaceae;Uncultured_10;Uncultured_10_unclassified;Uncultured_10_unclassified;.1
401	Bacteroidetes;Sphingobacteria;Sphingobacteriales_2;Chitinophagaceae;Uncultured_10;Uncultured_10_unclassified;Uncultured_10_unclassified;.4
402	Bacteroidetes;Sphingobacteria;Sphingobacteriales_2;Chitinophagaceae;Uncultured_10;Uncultured_10_unclassified;Uncultured_10_unclassified;
403	Bacteroidetes;Sphingobacteria;Sphingobacteriales_2;Chitinophagaceae;Uncultured_11;Uncultured_11_unclassified;Uncultured_11_unclassified;.1
404	Bacteroidetes;Sphingobacteria;Sphingobacteriales_2;Chitinophagaceae;Uncultured_13;Uncultured_13_unclassified;Uncultured_13_unclassified;.4
405	Bacteroidetes;Sphingobacteria;Sphingobacteriales_2;Chitinophagaceae;Uncultured_2;Uncultured_2_unclassified;Uncultured_2_unclassified;
406	Bacteroidetes;Sphingobacteria;Sphingobacteriales_2;Chitinophagaceae;Uncultured_6;Uncultured_6_unclassified;Uncultured_6_unclassified;
407	Bacteroidetes;Sphingobacteria;Sphingobacteriales_2;Saprospiraceae;Uncultured_1;Uncultured_1_unclassified;Uncultured_1_unclassified;.2
408	Bacteroidetes;Sphingobacteria;Sphingobacteriales_2;Saprospiraceae;Uncultured_2;Uncultured_2_unclassified;Uncultured_2_unclassified;
409	Bacteroidetes;Sphingobacteria;Sphingobacteriales_3;Cytophagaceae_1;Flexibacter_1;Flexibacter_1_unclassified;Flexibacter_1_unclassified;
410	Bacteroidetes;Sphingobacteria;Sphingobacteriales_3;Cytophagaceae_1;Flexibacter_1;Flexibacter_1_unclassified;Flexibacter_1_unclassified;.1
411	Bacteroidetes;Sphingobacteria;Sphingobacteriales_3;Cytophagaceae_1;Flexibacter_1;Flexibacter_1_unclassified;Flexibacter_1_unclassified;.10
412	Bacteroidetes;Sphingobacteria;Sphingobacteriales_3;Cytophagaceae_1;Flexibacter_1;Flexibacter_1_unclassified;Flexibacter_1_unclassified;.11
413	Bacteroidetes;Sphingobacteria;Sphingobacteriales_3;Cytophagaceae_1;Flexibacter_1;Flexibacter_1_unclassified;Flexibacter_1_unclassified;.12
414	Bacteroidetes;Sphingobacteria;Sphingobacteriales_3;Cytophagaceae_1;Flexibacter_1;Flexibacter_1_unclassified;Flexibacter_1_unclassified;.13
415	Bacteroidetes;Sphingobacteria;Sphingobacteriales_3;Cytophagaceae_1;Flexibacter_1;Flexibacter_1_unclassified;Flexibacter_1_unclassified;.14
416	Bacteroidetes;Sphingobacteria;Sphingobacteriales_3;Cytophagaceae_1;Flexibacter_1;Flexibacter_1_unclassified;Flexibacter_1_unclassified;.15
417	Bacteroidetes;Sphingobacteria;Sphingobacteriales_3;Cytophagaceae_1;Flexibacter_1;Flexibacter_1_unclassified;Flexibacter_1_unclassified;.16
418	Bacteroidetes;Sphingobacteria;Sphingobacteriales_3;Cytophagaceae_1;Flexibacter_1;Flexibacter_1_unclassified;Flexibacter_1_unclassified;.17
419	Bacteroidetes;Sphingobacteria;Sphingobacteriales_3;Cytophagaceae_1;Flexibacter_1;Flexibacter_1_unclassified;Flexibacter_1_unclassified;.19
420	Bacteroidetes;Sphingobacteria;Sphingobacteriales_3;Cytophagaceae_1;Flexibacter_1;Flexibacter_1_unclassified;Flexibacter_1_unclassified;.2
421	Bacteroidetes;Sphingobacteria;Sphingobacteriales_3;Cytophagaceae_1;Flexibacter_1;Flexibacter_1_unclassified;Flexibacter_1_unclassified;.21
422	Bacteroidetes;Sphingobacteria;Sphingobacteriales_3;Cytophagaceae_1;Flexibacter_1;Flexibacter_1_unclassified;Flexibacter_1_unclassified;.22
423	Bacteroidetes;Sphingobacteria;Sphingobacteriales_3;Cytophagaceae_1;Flexibacter_1;Flexibacter_1_unclassified;Flexibacter_1_unclassified;.28
424	Bacteroidetes;Sphingobacteria;Sphingobacteriales_3;Cytophagaceae_1;Flexibacter_1;Flexibacter_1_unclassified;Flexibacter_1_unclassified;.29
425	Bacteroidetes;Sphingobacteria;Sphingobacteriales_3;Cytophagaceae_1;Flexibacter_1;Flexibacter_1_unclassified;Flexibacter_1_unclassified;.3
426	Bacteroidetes;Sphingobacteria;Sphingobacteriales_3;Cytophagaceae_1;Flexibacter_1;Flexibacter_1_unclassified;Flexibacter_1_unclassified;.4
427	Bacteroidetes;Sphingobacteria;Sphingobacteriales_3;Cytophagaceae_1;Flexibacter_1;Flexibacter_1_unclassified;Flexibacter_1_unclassified;.5
428	Bacteroidetes;Sphingobacteria;Sphingobacteriales_3;Cytophagaceae_1;Flexibacter_1;Flexibacter_1_unclassified;Flexibacter_1_unclassified;.6
429	Bacteroidetes;Sphingobacteria;Sphingobacteriales_3;Cytophagaceae_1;Flexibacter_1;Flexibacter_1_unclassified;Flexibacter_1_unclassified;.7
430	Bacteroidetes;Sphingobacteria;Sphingobacteriales_3;Cytophagaceae_1;Flexibacter_1;Flexibacter_1_unclassified;Flexibacter_1_unclassified;.8
431	Bacteroidetes;Sphingobacteria;Sphingobacteriales_3;Cytophagaceae_3;Adhaeribacter;Adhaeribacter_unclassified;Adhaeribacter_unclassified;
432	Candidate_phylum_BD1_5;Candidate_phylum_BD1_5_unclassified;Candidate_phylum_BD1_5_unclassified;Candidate_phylum_BD1_5_unclassified;Candidate_phylum_BD1_5_unclassified;Candidate_phylum_BD1_5_unclassified;Candidate_phylum_BD1_5_unclassified;.15
433	Candidate_phylum_BD1_5;Candidate_phylum_BD1_5_unclassified;Candidate_phylum_BD1_5_unclassified;Candidate_phylum_BD1_5_unclassified;Candidate_phylum_BD1_5_unclassified;Candidate_phylum_BD1_5_unclassified;Candidate_phylum_BD1_5_unclassified;.2
434	Candidate_phylum_BD1_5;Candidate_phylum_BD1_5_unclassified;Candidate_phylum_BD1_5_unclassified;Candidate_phylum_BD1_5_unclassified;Candidate_phylum_BD1_5_unclassified;Candidate_phylum_BD1_5_unclassified;Candidate_phylum_BD1_5_unclassified;.7
435	Candidate_phylum_BRC1;Candidate_phylum_BRC1_unclassified;Candidate_phylum_BRC1_unclassified;Candidate_phylum_BRC1_unclassified;Candidate_phylum_BRC1_unclassified;Candidate_phylum_BRC1_unclassified;Candidate_phylum_BRC1_unclassified;.2
436	Candidate_phylum_OD1;Candidate_phylum_OD1_unclassified;Candidate_phylum_OD1_unclassified;Candidate_phylum_OD1_unclassified;Candidate_phylum_OD1_unclassified;Candidate_phylum_OD1_unclassified;Candidate_phylum_OD1_unclassified;
437	Candidate_phylum_OD1;Candidate_phylum_OD1_unclassified;Candidate_phylum_OD1_unclassified;Candidate_phylum_OD1_unclassified;Candidate_phylum_OD1_unclassified;Candidate_phylum_OD1_unclassified;Candidate_phylum_OD1_unclassified;.139
438	Candidate_phylum_OD1;Candidate_phylum_OD1_unclassified;Candidate_phylum_OD1_unclassified;Candidate_phylum_OD1_unclassified;Candidate_phylum_OD1_unclassified;Candidate_phylum_OD1_unclassified;Candidate_phylum_OD1_unclassified;.15
439	Candidate_phylum_OD1;Candidate_phylum_OD1_unclassified;Candidate_phylum_OD1_unclassified;Candidate_phylum_OD1_unclassified;Candidate_phylum_OD1_unclassified;Candidate_phylum_OD1_unclassified;Candidate_phylum_OD1_unclassified;.152
440	Candidate_phylum_OD1;Candidate_phylum_OD1_unclassified;Candidate_phylum_OD1_unclassified;Candidate_phylum_OD1_unclassified;Candidate_phylum_OD1_unclassified;Candidate_phylum_OD1_unclassified;Candidate_phylum_OD1_unclassified;.2
441	Candidate_phylum_OD1;Candidate_phylum_OD1_unclassified;Candidate_phylum_OD1_unclassified;Candidate_phylum_OD1_unclassified;Candidate_phylum_OD1_unclassified;Candidate_phylum_OD1_unclassified;Candidate_phylum_OD1_unclassified;.20
442	Candidate_phylum_OD1;Candidate_phylum_OD1_unclassified;Candidate_phylum_OD1_unclassified;Candidate_phylum_OD1_unclassified;Candidate_phylum_OD1_unclassified;Candidate_phylum_OD1_unclassified;Candidate_phylum_OD1_unclassified;.218
443	Candidate_phylum_OD1;Candidate_phylum_OD1_unclassified;Candidate_phylum_OD1_unclassified;Candidate_phylum_OD1_unclassified;Candidate_phylum_OD1_unclassified;Candidate_phylum_OD1_unclassified;Candidate_phylum_OD1_unclassified;.26
444	Candidate_phylum_OD1;Candidate_phylum_OD1_unclassified;Candidate_phylum_OD1_unclassified;Candidate_phylum_OD1_unclassified;Candidate_phylum_OD1_unclassified;Candidate_phylum_OD1_unclassified;Candidate_phylum_OD1_unclassified;.3
445	Candidate_phylum_OD1;Candidate_phylum_OD1_unclassified;Candidate_phylum_OD1_unclassified;Candidate_phylum_OD1_unclassified;Candidate_phylum_OD1_unclassified;Candidate_phylum_OD1_unclassified;Candidate_phylum_OD1_unclassified;.310
446	Candidate_phylum_OD1;Candidate_phylum_OD1_unclassified;Candidate_phylum_OD1_unclassified;Candidate_phylum_OD1_unclassified;Candidate_phylum_OD1_unclassified;Candidate_phylum_OD1_unclassified;Candidate_phylum_OD1_unclassified;.394
447	Candidate_phylum_OD1;Candidate_phylum_OD1_unclassified;Candidate_phylum_OD1_unclassified;Candidate_phylum_OD1_unclassified;Candidate_phylum_OD1_unclassified;Candidate_phylum_OD1_unclassified;Candidate_phylum_OD1_unclassified;.536
448	Candidate_phylum_OD1;Candidate_phylum_OD1_unclassified;Candidate_phylum_OD1_unclassified;Candidate_phylum_OD1_unclassified;Candidate_phylum_OD1_unclassified;Candidate_phylum_OD1_unclassified;Candidate_phylum_OD1_unclassified;.64
449	Candidate_phylum_OD1;Candidate_phylum_OD1_unclassified;Candidate_phylum_OD1_unclassified;Candidate_phylum_OD1_unclassified;Candidate_phylum_OD1_unclassified;Candidate_phylum_OD1_unclassified;Candidate_phylum_OD1_unclassified;.8
450	Candidate_phylum_OD1;Candidate_phylum_OD1_unclassified;Candidate_phylum_OD1_unclassified;Candidate_phylum_OD1_unclassified;Candidate_phylum_OD1_unclassified;Candidate_phylum_OD1_unclassified;Candidate_phylum_OD1_unclassified;.90
451	Candidate_phylum_OP3;Candidate_phylum_OP3_unclassified;Candidate_phylum_OP3_unclassified;Candidate_phylum_OP3_unclassified;Candidate_phylum_OP3_unclassified;Candidate_phylum_OP3_unclassified;Candidate_phylum_OP3_unclassified;
452	Candidate_phylum_OP3;Candidate_phylum_OP3_unclassified;Candidate_phylum_OP3_unclassified;Candidate_phylum_OP3_unclassified;Candidate_phylum_OP3_unclassified;Candidate_phylum_OP3_unclassified;Candidate_phylum_OP3_unclassified;.1
453	Candidate_phylum_OP3;Candidate_phylum_OP3_unclassified;Candidate_phylum_OP3_unclassified;Candidate_phylum_OP3_unclassified;Candidate_phylum_OP3_unclassified;Candidate_phylum_OP3_unclassified;Candidate_phylum_OP3_unclassified;.18
454	Candidate_phylum_OP3;Candidate_phylum_OP3_unclassified;Candidate_phylum_OP3_unclassified;Candidate_phylum_OP3_unclassified;Candidate_phylum_OP3_unclassified;Candidate_phylum_OP3_unclassified;Candidate_phylum_OP3_unclassified;.2
455	Candidate_phylum_OP3;Candidate_phylum_OP3_unclassified;Candidate_phylum_OP3_unclassified;Candidate_phylum_OP3_unclassified;Candidate_phylum_OP3_unclassified;Candidate_phylum_OP3_unclassified;Candidate_phylum_OP3_unclassified;.20
456	Candidate_phylum_OP3;Candidate_phylum_OP3_unclassified;Candidate_phylum_OP3_unclassified;Candidate_phylum_OP3_unclassified;Candidate_phylum_OP3_unclassified;Candidate_phylum_OP3_unclassified;Candidate_phylum_OP3_unclassified;.32
457	Candidate_phylum_OP3;Candidate_phylum_OP3_unclassified;Candidate_phylum_OP3_unclassified;Candidate_phylum_OP3_unclassified;Candidate_phylum_OP3_unclassified;Candidate_phylum_OP3_unclassified;Candidate_phylum_OP3_unclassified;.4
458	Candidate_phylum_OP3;Candidate_phylum_OP3_unclassified;Candidate_phylum_OP3_unclassified;Candidate_phylum_OP3_unclassified;Candidate_phylum_OP3_unclassified;Candidate_phylum_OP3_unclassified;Candidate_phylum_OP3_unclassified;.6
459	Candidate_phylum_SR1;Candidate_phylum_SR1_unclassified;Candidate_phylum_SR1_unclassified;Candidate_phylum_SR1_unclassified;Candidate_phylum_SR1_unclassified;Candidate_phylum_SR1_unclassified;Candidate_phylum_SR1_unclassified;
460	Candidate_phylum_TM6;Candidate_phylum_TM6_unclassified;Candidate_phylum_TM6_unclassified;Candidate_phylum_TM6_unclassified;Candidate_phylum_TM6_unclassified;Candidate_phylum_TM6_unclassified;Candidate_phylum_TM6_unclassified;
461	Candidate_phylum_TM6;Candidate_phylum_TM6_unclassified;Candidate_phylum_TM6_unclassified;Candidate_phylum_TM6_unclassified;Candidate_phylum_TM6_unclassified;Candidate_phylum_TM6_unclassified;Candidate_phylum_TM6_unclassified;.1
462	Candidate_phylum_TM6;Candidate_phylum_TM6_unclassified;Candidate_phylum_TM6_unclassified;Candidate_phylum_TM6_unclassified;Candidate_phylum_TM6_unclassified;Candidate_phylum_TM6_unclassified;Candidate_phylum_TM6_unclassified;.19
463	Candidate_phylum_TM6;Candidate_phylum_TM6_unclassified;Candidate_phylum_TM6_unclassified;Candidate_phylum_TM6_unclassified;Candidate_phylum_TM6_unclassified;Candidate_phylum_TM6_unclassified;Candidate_phylum_TM6_unclassified;.20
464	Candidate_phylum_WS3;Candidate_phylum_WS3_unclassified;Candidate_phylum_WS3_unclassified;Candidate_phylum_WS3_unclassified;Candidate_phylum_WS3_unclassified;Candidate_phylum_WS3_unclassified;Candidate_phylum_WS3_unclassified;
465	Candidate_phylum_WS3;Candidate_phylum_WS3_unclassified;Candidate_phylum_WS3_unclassified;Candidate_phylum_WS3_unclassified;Candidate_phylum_WS3_unclassified;Candidate_phylum_WS3_unclassified;Candidate_phylum_WS3_unclassified;.1
466	Candidate_phylum_WS3;Candidate_phylum_WS3_unclassified;Candidate_phylum_WS3_unclassified;Candidate_phylum_WS3_unclassified;Candidate_phylum_WS3_unclassified;Candidate_phylum_WS3_unclassified;Candidate_phylum_WS3_unclassified;.10
467	Candidate_phylum_WS3;Candidate_phylum_WS3_unclassified;Candidate_phylum_WS3_unclassified;Candidate_phylum_WS3_unclassified;Candidate_phylum_WS3_unclassified;Candidate_phylum_WS3_unclassified;Candidate_phylum_WS3_unclassified;.12
468	Candidate_phylum_WS3;Candidate_phylum_WS3_unclassified;Candidate_phylum_WS3_unclassified;Candidate_phylum_WS3_unclassified;Candidate_phylum_WS3_unclassified;Candidate_phylum_WS3_unclassified;Candidate_phylum_WS3_unclassified;.13
469	Candidate_phylum_WS3;Candidate_phylum_WS3_unclassified;Candidate_phylum_WS3_unclassified;Candidate_phylum_WS3_unclassified;Candidate_phylum_WS3_unclassified;Candidate_phylum_WS3_unclassified;Candidate_phylum_WS3_unclassified;.2
470	Candidate_phylum_WS3;Candidate_phylum_WS3_unclassified;Candidate_phylum_WS3_unclassified;Candidate_phylum_WS3_unclassified;Candidate_phylum_WS3_unclassified;Candidate_phylum_WS3_unclassified;Candidate_phylum_WS3_unclassified;.20
471	Candidate_phylum_WS3;Candidate_phylum_WS3_unclassified;Candidate_phylum_WS3_unclassified;Candidate_phylum_WS3_unclassified;Candidate_phylum_WS3_unclassified;Candidate_phylum_WS3_unclassified;Candidate_phylum_WS3_unclassified;.23
472	Candidate_phylum_WS3;Candidate_phylum_WS3_unclassified;Candidate_phylum_WS3_unclassified;Candidate_phylum_WS3_unclassified;Candidate_phylum_WS3_unclassified;Candidate_phylum_WS3_unclassified;Candidate_phylum_WS3_unclassified;.25
473	Candidate_phylum_WS3;Candidate_phylum_WS3_unclassified;Candidate_phylum_WS3_unclassified;Candidate_phylum_WS3_unclassified;Candidate_phylum_WS3_unclassified;Candidate_phylum_WS3_unclassified;Candidate_phylum_WS3_unclassified;.3
474	Candidate_phylum_WS3;Candidate_phylum_WS3_unclassified;Candidate_phylum_WS3_unclassified;Candidate_phylum_WS3_unclassified;Candidate_phylum_WS3_unclassified;Candidate_phylum_WS3_unclassified;Candidate_phylum_WS3_unclassified;.43
475	Candidate_phylum_WS3;Candidate_phylum_WS3_unclassified;Candidate_phylum_WS3_unclassified;Candidate_phylum_WS3_unclassified;Candidate_phylum_WS3_unclassified;Candidate_phylum_WS3_unclassified;Candidate_phylum_WS3_unclassified;.5
476	Candidate_phylum_WS3;Candidate_phylum_WS3_unclassified;Candidate_phylum_WS3_unclassified;Candidate_phylum_WS3_unclassified;Candidate_phylum_WS3_unclassified;Candidate_phylum_WS3_unclassified;Candidate_phylum_WS3_unclassified;.6
477	Candidate_phylum_WS3;Candidate_phylum_WS3_unclassified;Candidate_phylum_WS3_unclassified;Candidate_phylum_WS3_unclassified;Candidate_phylum_WS3_unclassified;Candidate_phylum_WS3_unclassified;Candidate_phylum_WS3_unclassified;.7
478	Candidate_phylum_WS3;Candidate_phylum_WS3_unclassified;Candidate_phylum_WS3_unclassified;Candidate_phylum_WS3_unclassified;Candidate_phylum_WS3_unclassified;Candidate_phylum_WS3_unclassified;Candidate_phylum_WS3_unclassified;.9
479	Chlamydiae;Chlamydiae;Chlamydiales;Chlamydiales_unclassified;Chlamydiales_unclassified;Chlamydiales_unclassified;Chlamydiales_unclassified;
480	Chlamydiae;Chlamydiae;Chlamydiales;Chlamydiales_unclassified;Chlamydiales_unclassified;Chlamydiales_unclassified;Chlamydiales_unclassified;.1
481	Chlamydiae;Chlamydiae;Chlamydiales;Chlamydiales_unclassified;Chlamydiales_unclassified;Chlamydiales_unclassified;Chlamydiales_unclassified;.5
482	Chlamydiae;Chlamydiae;Chlamydiales;Chlamydiales_unclassified;Chlamydiales_unclassified;Chlamydiales_unclassified;Chlamydiales_unclassified;
483	Chlamydiae;Chlamydiae;Chlamydiales;cvE6;cvE6_unclassified;cvE6_unclassified;cvE6_unclassified;.12
484	Chlamydiae;Chlamydiae;Chlamydiales;cvE6;cvE6_unclassified;cvE6_unclassified;cvE6_unclassified;.29
485	Chlamydiae;Chlamydiae;Chlamydiales;cvE6;cvE6_unclassified;cvE6_unclassified;cvE6_unclassified;.3
486	Chlamydiae;Chlamydiae;Chlamydiales;cvE6;cvE6_unclassified;cvE6_unclassified;cvE6_unclassified;.6
487	Chlamydiae;Chlamydiae;Chlamydiales;Simkaniaceae;Candidatus_Rhabdochlamydia;Candidatus_Rhabdochlamydia_unclassified;Candidatus_Rhabdochlamydia_unclassified;
488	Chlamydiae;Chlamydiae;Chlamydiales;Simkaniaceae;Candidatus_Rhabdochlamydia;Candidatus_Rhabdochlamydia_unclassified;Candidatus_Rhabdochlamydia_unclassified;.1
489	Chlamydiae;Chlamydiae;Chlamydiales;Simkaniaceae;Candidatus_Rhabdochlamydia;Candidatus_Rhabdochlamydia_unclassified;Candidatus_Rhabdochlamydia_unclassified;.12
490	Chlamydiae;Chlamydiae;Chlamydiales;Simkaniaceae;Candidatus_Rhabdochlamydia;Candidatus_Rhabdochlamydia_unclassified;Candidatus_Rhabdochlamydia_unclassified;.2
491	Chlamydiae;Chlamydiae;Chlamydiales;Simkaniaceae;Candidatus_Rhabdochlamydia;Candidatus_Rhabdochlamydia_unclassified;Candidatus_Rhabdochlamydia_unclassified;.21
492	Chlamydiae;Chlamydiae;Chlamydiales;Simkaniaceae;Candidatus_Rhabdochlamydia;Candidatus_Rhabdochlamydia_unclassified;Candidatus_Rhabdochlamydia_unclassified;.4
493	Chlamydiae;Chlamydiae;Chlamydiales;Simkaniaceae;Candidatus_Rhabdochlamydia;Candidatus_Rhabdochlamydia_unclassified;Candidatus_Rhabdochlamydia_unclassified;
494	Chlamydiae;Chlamydiae;Chlamydiales;Simkaniaceae;Candidatus_Rhabdochlamydia;Candidatus_Rhabdochlamydia_unclassified;Candidatus_Rhabdochlamydia_unclassified;
495	Chlorobi;Chlorobia;Chlorobiales;BSV26;BSV26_unclassified;BSV26_unclassified;BSV26_unclassified;
496	Chlorobi;Chlorobia;Chlorobiales;BSV26;BSV26_unclassified;BSV26_unclassified;BSV26_unclassified;.1
497	Chlorobi;Chlorobia;Chlorobiales;BSV26;BSV26_unclassified;BSV26_unclassified;BSV26_unclassified;.2
498	Chlorobi;Chlorobia;Chlorobiales;BSV26;BSV26_unclassified;BSV26_unclassified;BSV26_unclassified;.3
499	Chlorobi;Chlorobia;Chlorobiales;Chlorobiales_unclassified;Chlorobiales_unclassified;Chlorobiales_unclassified;Chlorobiales_unclassified;
500	Chlorobi;Chlorobia;Chlorobiales;OPB56;OPB56_unclassified;OPB56_unclassified;OPB56_unclassified;
501	Chlorobi;Chlorobia;Chlorobiales;OPB56;Termite_cluster;Termite_cluster_unclassified;Termite_cluster_unclassified;
502	Chlorobi;Chlorobia;Chlorobiales;SJA-28;SJA-28_unclassified;SJA-28_unclassified;SJA-28_unclassified;
503	Chloroflexi;Anaerolineae;Anaerolineales;Anaerolineaceae;Anaerolinea;Anaerolinea_unclassified;Anaerolinea_unclassified;
504	Chloroflexi;Anaerolineae;Anaerolineales;Anaerolineaceae;Anaerolinea;Anaerolinea_unclassified;Anaerolinea_unclassified;
505	Chloroflexi;Anaerolineae;Anaerolineales;Anaerolineaceae;Anaerolineaceae_unclassified;Anaerolineaceae_unclassified;Anaerolineaceae_unclassified;.1
506	Chloroflexi;Anaerolineae;Anaerolineales;Anaerolineaceae;Anaerolineaceae_unclassified;Anaerolineaceae_unclassified;Anaerolineaceae_unclassified;
507	Chloroflexi;Anaerolineae;Anaerolineales;Anaerolineaceae;Uncultured_10;Uncultured_10_unclassified;Uncultured_10_unclassified;
508	Chloroflexi;Anaerolineae;Anaerolineales;Anaerolineaceae;Uncultured_10;Uncultured_10_unclassified;Uncultured_10_unclassified;.1
509	Chloroflexi;Anaerolineae;Anaerolineales;Anaerolineaceae;Uncultured_10;Uncultured_10_unclassified;Uncultured_10_unclassified;.10
510	Chloroflexi;Anaerolineae;Anaerolineales;Anaerolineaceae;Uncultured_10;Uncultured_10_unclassified;Uncultured_10_unclassified;.4
511	Chloroflexi;Anaerolineae;Anaerolineales;Anaerolineaceae;Uncultured_10;Uncultured_10_unclassified;Uncultured_10_unclassified;.5
512	Chloroflexi;Anaerolineae;Anaerolineales;Anaerolineaceae;Uncultured_10;Uncultured_10_unclassified;Uncultured_10_unclassified;.6
513	Chloroflexi;Anaerolineae;Anaerolineales;Anaerolineaceae;Uncultured_11;Uncultured_11_unclassified;Uncultured_11_unclassified;
514	Chloroflexi;Anaerolineae;Anaerolineales;Anaerolineaceae;Uncultured_11;Uncultured_11_unclassified;Uncultured_11_unclassified;.10
515	Chloroflexi;Anaerolineae;Anaerolineales;Anaerolineaceae;Uncultured_11;Uncultured_11_unclassified;Uncultured_11_unclassified;.11
516	Chloroflexi;Anaerolineae;Anaerolineales;Anaerolineaceae;Uncultured_11;Uncultured_11_unclassified;Uncultured_11_unclassified;.12
517	Chloroflexi;Anaerolineae;Anaerolineales;Anaerolineaceae;Uncultured_11;Uncultured_11_unclassified;Uncultured_11_unclassified;.14
518	Chloroflexi;Anaerolineae;Anaerolineales;Anaerolineaceae;Uncultured_11;Uncultured_11_unclassified;Uncultured_11_unclassified;.16
519	Chloroflexi;Anaerolineae;Anaerolineales;Anaerolineaceae;Uncultured_11;Uncultured_11_unclassified;Uncultured_11_unclassified;.19
520	Chloroflexi;Anaerolineae;Anaerolineales;Anaerolineaceae;Uncultured_11;Uncultured_11_unclassified;Uncultured_11_unclassified;.2
521	Chloroflexi;Anaerolineae;Anaerolineales;Anaerolineaceae;Uncultured_11;Uncultured_11_unclassified;Uncultured_11_unclassified;.22
522	Chloroflexi;Anaerolineae;Anaerolineales;Anaerolineaceae;Uncultured_11;Uncultured_11_unclassified;Uncultured_11_unclassified;.25
523	Chloroflexi;Anaerolineae;Anaerolineales;Anaerolineaceae;Uncultured_11;Uncultured_11_unclassified;Uncultured_11_unclassified;.26
524	Chloroflexi;Anaerolineae;Anaerolineales;Anaerolineaceae;Uncultured_11;Uncultured_11_unclassified;Uncultured_11_unclassified;.29
525	Chloroflexi;Anaerolineae;Anaerolineales;Anaerolineaceae;Uncultured_11;Uncultured_11_unclassified;Uncultured_11_unclassified;.3
526	Chloroflexi;Anaerolineae;Anaerolineales;Anaerolineaceae;Uncultured_11;Uncultured_11_unclassified;Uncultured_11_unclassified;.4
527	Chloroflexi;Anaerolineae;Anaerolineales;Anaerolineaceae;Uncultured_11;Uncultured_11_unclassified;Uncultured_11_unclassified;.5
528	Chloroflexi;Anaerolineae;Anaerolineales;Anaerolineaceae;Uncultured_11;Uncultured_11_unclassified;Uncultured_11_unclassified;.50
529	Chloroflexi;Anaerolineae;Anaerolineales;Anaerolineaceae;Uncultured_11;Uncultured_11_unclassified;Uncultured_11_unclassified;.6
530	Chloroflexi;Anaerolineae;Anaerolineales;Anaerolineaceae;Uncultured_11;Uncultured_11_unclassified;Uncultured_11_unclassified;.7
531	Chloroflexi;Anaerolineae;Anaerolineales;Anaerolineaceae;Uncultured_11;Uncultured_11_unclassified;Uncultured_11_unclassified;.93
532	Chloroflexi;Anaerolineae;Anaerolineales;Anaerolineaceae;Uncultured_11;Uncultured_11_unclassified;Uncultured_11_unclassified;
533	Chloroflexi;Anaerolineae;Anaerolineales;Anaerolineaceae;Uncultured_4;Uncultured_4_unclassified;Uncultured_4_unclassified;
534	Chloroflexi;Anaerolineae;Anaerolineales;Anaerolineaceae;Uncultured_4;Uncultured_4_unclassified;Uncultured_4_unclassified;.1
535	Chloroflexi;Anaerolineae;Anaerolineales;Anaerolineaceae;Uncultured_4;Uncultured_4_unclassified;Uncultured_4_unclassified;.2
536	Chloroflexi;Anaerolineae;Anaerolineales;Anaerolineaceae;Uncultured_4;Uncultured_4_unclassified;Uncultured_4_unclassified;.3
537	Chloroflexi;Anaerolineae;Anaerolineales;Anaerolineaceae;Uncultured_4;Uncultured_4_unclassified;Uncultured_4_unclassified;
538	Chloroflexi;Anaerolineae;Anaerolineales;Anaerolineaceae;Uncultured_7;Uncultured_7_unclassified;Uncultured_7_unclassified;
539	Chloroflexi;Anaerolineae;Anaerolineales;Anaerolineaceae;Uncultured_7;Uncultured_7_unclassified;Uncultured_7_unclassified;.1
540	Chloroflexi;Anaerolineae;Anaerolineales;Anaerolineaceae;Uncultured_7;Uncultured_7_unclassified;Uncultured_7_unclassified;.2
541	Chloroflexi;Caldilineae;Caldilineales;Caldilineaceae;Uncultured_1;Uncultured_1_unclassified;Uncultured_1_unclassified;
542	Chloroflexi;Caldilineae;Caldilineales;Caldilineaceae;Uncultured_1;Uncultured_1_unclassified;Uncultured_1_unclassified;.2
543	Chloroflexi;Caldilineae;Caldilineales;Caldilineaceae;Uncultured_1;Uncultured_1_unclassified;Uncultured_1_unclassified;
544	Chloroflexi;Caldilineae;Caldilineales;Caldilineaceae;Uncultured_4;Uncultured_4_unclassified;Uncultured_4_unclassified;.3
545	Chloroflexi;Caldilineae;Caldilineales;Caldilineaceae;Uncultured_5;Uncultured_5_unclassified;Uncultured_5_unclassified;
546	Chloroflexi;Caldilineae;Caldilineales;Caldilineaceae;Uncultured_5;Uncultured_5_unclassified;Uncultured_5_unclassified;.1
547	Chloroflexi;Caldilineae;Caldilineales;Caldilineaceae;Uncultured_5;Uncultured_5_unclassified;Uncultured_5_unclassified;.2
548	Chloroflexi;Caldilineae;Caldilineales;Caldilineaceae;Uncultured_5;Uncultured_5_unclassified;Uncultured_5_unclassified;.21
549	Chloroflexi;Caldilineae;Caldilineales;Caldilineaceae;Uncultured_5;Uncultured_5_unclassified;Uncultured_5_unclassified;.3
550	Chloroflexi;Caldilineae;Caldilineales;Caldilineaceae;Uncultured_5;Uncultured_5_unclassified;Uncultured_5_unclassified;.5
551	Chloroflexi;Caldilineae;Caldilineales;Caldilineaceae;Uncultured_5;Uncultured_5_unclassified;Uncultured_5_unclassified;.6
552	Chloroflexi;Chloroflexi_unclassified;Chloroflexi_unclassified;Chloroflexi_unclassified;Chloroflexi_unclassified;Chloroflexi_unclassified;Chloroflexi_unclassified;
553	Chloroflexi;Chloroflexi_unclassified;Chloroflexi_unclassified;Chloroflexi_unclassified;Chloroflexi_unclassified;Chloroflexi_unclassified;Chloroflexi_unclassified;.10
554	Chloroflexi;Chloroflexi_unclassified;Chloroflexi_unclassified;Chloroflexi_unclassified;Chloroflexi_unclassified;Chloroflexi_unclassified;Chloroflexi_unclassified;.3
555	Chloroflexi;Chloroflexi_unclassified;Chloroflexi_unclassified;Chloroflexi_unclassified;Chloroflexi_unclassified;Chloroflexi_unclassified;Chloroflexi_unclassified;.5
556	Chloroflexi;Chloroflexi;Chloroflexales;Chloroflexaceae;Roseiflexus;Roseiflexus_unclassified;Roseiflexus_unclassified;.1
557	Chloroflexi;Chloroflexi;Chloroflexales;Chloroflexaceae;Roseiflexus;Roseiflexus_unclassified;Roseiflexus_unclassified;.4
558	Chloroflexi;FW22;FW22_unclassified;FW22_unclassified;FW22_unclassified;FW22_unclassified;FW22_unclassified;
559	Chloroflexi;Gitt-GS-136;Gitt-GS-136_unclassified;Gitt-GS-136_unclassified;Gitt-GS-136_unclassified;Gitt-GS-136_unclassified;Gitt-GS-136_unclassified;
560	Chloroflexi;JG30-KF-CM66;JG30-KF-CM66_unclassified;JG30-KF-CM66_unclassified;JG30-KF-CM66_unclassified;JG30-KF-CM66_unclassified;JG30-KF-CM66_unclassified;
561	Chloroflexi;JG30-KF-CM66;JG30-KF-CM66_unclassified;JG30-KF-CM66_unclassified;JG30-KF-CM66_unclassified;JG30-KF-CM66_unclassified;JG30-KF-CM66_unclassified;.1
562	Chloroflexi;JG30-KF-CM66;JG30-KF-CM66_unclassified;JG30-KF-CM66_unclassified;JG30-KF-CM66_unclassified;JG30-KF-CM66_unclassified;JG30-KF-CM66_unclassified;.3
563	Chloroflexi;JG30-KF-CM66;JG30-KF-CM66_unclassified;JG30-KF-CM66_unclassified;JG30-KF-CM66_unclassified;JG30-KF-CM66_unclassified;JG30-KF-CM66_unclassified;.4
564	Chloroflexi;KD4-96;KD4-96_unclassified;KD4-96_unclassified;KD4-96_unclassified;KD4-96_unclassified;KD4-96_unclassified;
565	Chloroflexi;KD4-96;KD4-96_unclassified;KD4-96_unclassified;KD4-96_unclassified;KD4-96_unclassified;KD4-96_unclassified;.1
566	Chloroflexi;KD4-96;KD4-96_unclassified;KD4-96_unclassified;KD4-96_unclassified;KD4-96_unclassified;KD4-96_unclassified;.10
567	Chloroflexi;KD4-96;KD4-96_unclassified;KD4-96_unclassified;KD4-96_unclassified;KD4-96_unclassified;KD4-96_unclassified;.14
568	Chloroflexi;KD4-96;KD4-96_unclassified;KD4-96_unclassified;KD4-96_unclassified;KD4-96_unclassified;KD4-96_unclassified;.2
569	Chloroflexi;KD4-96;KD4-96_unclassified;KD4-96_unclassified;KD4-96_unclassified;KD4-96_unclassified;KD4-96_unclassified;.4
570	Chloroflexi;KD4-96;KD4-96_unclassified;KD4-96_unclassified;KD4-96_unclassified;KD4-96_unclassified;KD4-96_unclassified;.5
571	Chloroflexi;KD4-96;KD4-96_unclassified;KD4-96_unclassified;KD4-96_unclassified;KD4-96_unclassified;KD4-96_unclassified;.6
572	Chloroflexi;KD4-96;KD4-96_unclassified;KD4-96_unclassified;KD4-96_unclassified;KD4-96_unclassified;KD4-96_unclassified;.7
573	Chloroflexi;Ktedonobacteria;Ktedonobacteriales;Ktedonobacteriaceae;Ktedonobacter;Ktedonobacter_unclassified;Ktedonobacter_unclassified;.2
574	Chloroflexi;P2-11E;P2-11E_unclassified;P2-11E_unclassified;P2-11E_unclassified;P2-11E_unclassified;P2-11E_unclassified;
575	Chloroflexi;S085;S085_unclassified;S085_unclassified;S085_unclassified;S085_unclassified;S085_unclassified;
576	Chloroflexi;S085;S085_unclassified;S085_unclassified;S085_unclassified;S085_unclassified;S085_unclassified;.3
577	Chloroflexi;TK10;TK10_unclassified;TK10_unclassified;TK10_unclassified;TK10_unclassified;TK10_unclassified;
578	Chloroflexi;TK10;TK10_unclassified;TK10_unclassified;TK10_unclassified;TK10_unclassified;TK10_unclassified;.1
579	Chloroflexi;TK10;TK10_unclassified;TK10_unclassified;TK10_unclassified;TK10_unclassified;TK10_unclassified;.11
580	Chloroflexi;TK10;TK10_unclassified;TK10_unclassified;TK10_unclassified;TK10_unclassified;TK10_unclassified;.2
581	Chloroflexi;TK10;TK10_unclassified;TK10_unclassified;TK10_unclassified;TK10_unclassified;TK10_unclassified;.7
582	Chloroflexi;TK10;TK10_unclassified;TK10_unclassified;TK10_unclassified;TK10_unclassified;TK10_unclassified;.9
583	Cyanobacteria;Cyanobacteria;Cyanobacteriales;MLE1-12;MLE1-12_unclassified;MLE1-12_unclassified;MLE1-12_unclassified;
584	Cyanobacteria;Cyanobacteria;Cyanobacteriales;MLE1-12;MLE1-12_unclassified;MLE1-12_unclassified;MLE1-12_unclassified;.6
585	Deferribacteres;Deferribacteres;Deferribacterales;Deferribacteraceae;Deferribacteraceae_unclassified;Deferribacteraceae_unclassified;Deferribacteraceae_unclassified;
586	Deferribacteres;Deferribacteres;Deferribacterales;Deferribacteraceae;Mucispirillum;Mucispirillum_unclassified;Mucispirillum_unclassified;.2
587	Elusimicrobia;Elusimicrobia;Elusimicrobiales;Lineage_IIa;Lineage_IIa_unclassified;Lineage_IIa_unclassified;Lineage_IIa_unclassified;
588	Elusimicrobia;Elusimicrobia;Elusimicrobiales;Lineage_IIa;Lineage_IIa_unclassified;Lineage_IIa_unclassified;Lineage_IIa_unclassified;.1
589	Elusimicrobia;Elusimicrobia;Elusimicrobiales;Lineage_IIa;Lineage_IIa_unclassified;Lineage_IIa_unclassified;Lineage_IIa_unclassified;.2
590	Elusimicrobia;Elusimicrobia;Elusimicrobiales;Lineage_IIa;Lineage_IIa_unclassified;Lineage_IIa_unclassified;Lineage_IIa_unclassified;.5
591	Elusimicrobia;Elusimicrobia;Elusimicrobiales;Lineage_IIa;Lineage_IIa_unclassified;Lineage_IIa_unclassified;Lineage_IIa_unclassified;.6
592	Elusimicrobia;Elusimicrobia;Elusimicrobiales;Lineage_IIb;Lineage_IIb_unclassified;Lineage_IIb_unclassified;Lineage_IIb_unclassified;.2
593	Elusimicrobia;Elusimicrobia;Elusimicrobiales;Lineage_IIc;Lineage_IIc_unclassified;Lineage_IIc_unclassified;Lineage_IIc_unclassified;.3
594	Elusimicrobia;Elusimicrobia;Elusimicrobiales;Lineage_IId;Lineage_IId_unclassified;Lineage_IId_unclassified;Lineage_IId_unclassified;
595	Elusimicrobia;Elusimicrobia;Elusimicrobiales;Lineage_III;Lineage_III_unclassified;Lineage_III_unclassified;Lineage_III_unclassified;
596	Elusimicrobia;Elusimicrobia;Elusimicrobiales;Lineage_III;Lineage_III_unclassified;Lineage_III_unclassified;Lineage_III_unclassified;.11
597	Elusimicrobia;Elusimicrobia;Elusimicrobiales;Lineage_IV;Lineage_IV_unclassified;Lineage_IV_unclassified;Lineage_IV_unclassified;
598	Elusimicrobia;Elusimicrobia;Elusimicrobiales;Lineage_IV;Lineage_IV_unclassified;Lineage_IV_unclassified;Lineage_IV_unclassified;.2
599	Firmicutes;Bacilli;Bacillales;Bacillaceae;Bacillus_11;Bacillus_11_unclassified;Bacillus_11_unclassified;
600	Firmicutes;Bacilli;Lactobacillales;Cockroach_cluster;Cockroach_cluster_unclassified;Cockroach_cluster_unclassified;Cockroach_cluster_unclassified;
601	Firmicutes;Bacilli;Lactobacillales;Enterococcaceae;Vagococcus;Vagococcus_unclassified;Vagococcus_unclassified;
602	Firmicutes;Bacilli;Lactobacillales;Enterococcaceae;Enterococcus;Enterococcus_unclassified;Enterococcus_unclassified;*
603	Firmicutes;Bacilli;Lactobacillales;Lactobacillaceae;Lactobacillaceae_unclassified;Lactobacillaceae_unclassified;Lactobacillaceae_unclassified;.4
604	Firmicutes;Bacilli;Lactobacillales;Lactobacillaceae;Lactobacillaceae_unclassified;Lactobacillaceae_unclassified;Lactobacillaceae_unclassified;
605	Firmicutes;Bacilli;Lactobacillales;Lactobacillaceae;Lactobacillus_1;Lactobacillus_1_unclassified;Lactobacillus_1_unclassified;
606	Firmicutes;Bacilli;Lactobacillales;Lactobacillaceae;Lactobacillus_2;Lactobacillus_2_unclassified;Lactobacillus_2_unclassified;
607	Firmicutes;Bacilli;Lactobacillales;Lactobacillaceae;Lactobacillus_4;Lactobacillus_4_unclassified;Lactobacillus_4_unclassified;
608	Firmicutes;Bacilli;Lactobacillales;Lactobacillaceae;Lactobacillus_5;Lactobacillus_5_unclassified;Lactobacillus_5_unclassified;
609	Firmicutes;Bacilli;Lactobacillales;Lactobacillaceae;Lactobacillus_sp_a;Lactobacillus_sp_a_unclassified;Lactobacillus_sp_a_unclassified;
610	Firmicutes;Bacilli;Lactobacillales;Lactobacillales_unclassified;Lactobacillales_unclassified;Lactobacillales_unclassified;Lactobacillales_unclassified;
611	Firmicutes;Bacilli;Lactobacillales;Lactobacillales_unclassified;Lactobacillales_unclassified;Lactobacillales_unclassified;Lactobacillales_unclassified;.6
612	Firmicutes;Bacilli;Lactobacillales;Lactobacillales_unclassified;Lactobacillales_unclassified;Lactobacillales_unclassified;Lactobacillales_unclassified;
613	Firmicutes;Bacilli;Lactobacillales;Streptococcaceae;Lactococcus_3;Lactococcus_3_unclassified;Lactococcus_3_unclassified;.2
614	Firmicutes;Bacilli;Lactobacillales;Streptococcaceae;Streptococcaceae_unclassified;Streptococcaceae_unclassified;Streptococcaceae_unclassified;
615	Firmicutes;CK-1C4-19;CK-1C4-19_unclassified;CK-1C4-19_unclassified;CK-1C4-19_unclassified;CK-1C4-19_unclassified;CK-1C4-19_unclassified;
616	Firmicutes;Clostridia_1;Clostridiales;Clostridiaceae_1;Arthropod_cluster;Arthropod_cluster_unclassified;Arthropod_cluster_unclassified;
617	Firmicutes;Clostridia_1;Clostridiales;Clostridiaceae_1;Clostridiaceae_1_unclassified;Clostridiaceae_1_unclassified;Clostridiaceae_1_unclassified;
618	Firmicutes;Clostridia_1;Clostridiales;Clostridiales_unclassified;Clostridiales_unclassified;Clostridiales_unclassified;Clostridiales_unclassified;
619	Firmicutes;Clostridia_1;Clostridiales;Clostridiales_unclassified;Clostridiales_unclassified;Clostridiales_unclassified;Clostridiales_unclassified;.1
620	Firmicutes;Clostridia_1;Clostridiales;Clostridiales_unclassified;Clostridiales_unclassified;Clostridiales_unclassified;Clostridiales_unclassified;.10
621	Firmicutes;Clostridia_1;Clostridiales;Clostridiales_unclassified;Clostridiales_unclassified;Clostridiales_unclassified;Clostridiales_unclassified;.12
622	Firmicutes;Clostridia_1;Clostridiales;Clostridiales_unclassified;Clostridiales_unclassified;Clostridiales_unclassified;Clostridiales_unclassified;.2
623	Firmicutes;Clostridia_1;Clostridiales;Clostridiales_unclassified;Clostridiales_unclassified;Clostridiales_unclassified;Clostridiales_unclassified;.26
624	Firmicutes;Clostridia_1;Clostridiales;Clostridiales_unclassified;Clostridiales_unclassified;Clostridiales_unclassified;Clostridiales_unclassified;.29
625	Firmicutes;Clostridia_1;Clostridiales;Clostridiales_unclassified;Clostridiales_unclassified;Clostridiales_unclassified;Clostridiales_unclassified;.3
626	Firmicutes;Clostridia_1;Clostridiales;Clostridiales_unclassified;Clostridiales_unclassified;Clostridiales_unclassified;Clostridiales_unclassified;.33
627	Firmicutes;Clostridia_1;Clostridiales;Clostridiales_unclassified;Clostridiales_unclassified;Clostridiales_unclassified;Clostridiales_unclassified;.39
628	Firmicutes;Clostridia_1;Clostridiales;Clostridiales_unclassified;Clostridiales_unclassified;Clostridiales_unclassified;Clostridiales_unclassified;.4
629	Firmicutes;Clostridia_1;Clostridiales;Clostridiales_unclassified;Clostridiales_unclassified;Clostridiales_unclassified;Clostridiales_unclassified;.7
630	Firmicutes;Clostridia_1;Clostridiales;Clostridiales_unclassified;Clostridiales_unclassified;Clostridiales_unclassified;Clostridiales_unclassified;.8
631	Firmicutes;Clostridia_1;Clostridiales;Clostridiales_unclassified;Clostridiales_unclassified;Clostridiales_unclassified;Clostridiales_unclassified;.9
632	Firmicutes;Clostridia_1;Clostridiales;Clostridiales_unclassified;Clostridiales_unclassified;Clostridiales_unclassified;Clostridiales_unclassified;
633	Firmicutes;Clostridia_1;Clostridiales;Clostridiales_unclassified;Clostridiales_unclassified;Clostridiales_unclassified;Clostridiales_unclassified;
634	Firmicutes;Clostridia_1;Clostridiales;Clostridiales_unclassified;Clostridiales_unclassified;Clostridiales_unclassified;Clostridiales_unclassified;
635	Firmicutes;Clostridia_1;Clostridiales;Clostridiales_unclassified;Clostridiales_unclassified;Clostridiales_unclassified;Clostridiales_unclassified;.1
636	Firmicutes;Clostridia_1;Clostridiales;Eubacteriaceae_1;Anaerofustis;Anaerofustis_unclassified;Anaerofustis_unclassified;.1
637	Firmicutes;Clostridia_1;Clostridiales;Family_XIII_Incertae_Sedis;Anaerovorax_1;Anaerovorax_1_unclassified;Anaerovorax_1_unclassified;
638	Firmicutes;Clostridia_1;Clostridiales;Family_XIII_Incertae_Sedis;Eubacterium_3;Eubacterium_3_unclassified;Eubacterium_3_unclassified;
639	Firmicutes;Clostridia_1;Clostridiales;Family_XIII_Incertae_Sedis;Family_XIII_Incertae_Sedis_unclassified;Family_XIII_Incertae_Sedis_unclassified;Family_XIII_Incertae_Sedis_unclassified;
640	Firmicutes;Clostridia_1;Clostridiales;Family_XIII_Incertae_Sedis;Family_XIII_Incertae_Sedis_unclassified;Family_XIII_Incertae_Sedis_unclassified;Family_XIII_Incertae_Sedis_unclassified;.11
641	Firmicutes;Clostridia_1;Clostridiales;Family_XIII_Incertae_Sedis;Family_XIII_Incertae_Sedis_unclassified;Family_XIII_Incertae_Sedis_unclassified;Family_XIII_Incertae_Sedis_unclassified;.2
642	Firmicutes;Clostridia_1;Clostridiales;Family_XIII_Incertae_Sedis;Family_XIII_Incertae_Sedis_unclassified;Family_XIII_Incertae_Sedis_unclassified;Family_XIII_Incertae_Sedis_unclassified;.5
643	Firmicutes;Clostridia_1;Clostridiales;Family_XIII_Incertae_Sedis;Family_XIII_Incertae_Sedis_unclassified;Family_XIII_Incertae_Sedis_unclassified;Family_XIII_Incertae_Sedis_unclassified;.6
644	Firmicutes;Clostridia_1;Clostridiales;Family_XIII_Incertae_Sedis;Family_XIII_Incertae_Sedis_unclassified;Family_XIII_Incertae_Sedis_unclassified;Family_XIII_Incertae_Sedis_unclassified;.1
645	Firmicutes;Clostridia_1;Clostridiales;Family_XIII_Incertae_Sedis;Family_XIII_Incertae_Sedis_unclassified;Family_XIII_Incertae_Sedis_unclassified;Family_XIII_Incertae_Sedis_unclassified;
646	Firmicutes;Clostridia_1;Clostridiales;Family_XIII_Incertae_Sedis;Gut_cluster_1;Gut_cluster_1_unclassified;Gut_cluster_1_unclassified;
647	Firmicutes;Clostridia_1;Clostridiales;Family_XIII_Incertae_Sedis;Termite_cockroach_cluster_1;Termite_cockroach_cluster_1_unclassified;Termite_cockroach_cluster_1_unclassified;
648	Firmicutes;Clostridia_1;Clostridiales;Family_XIII_Incertae_Sedis;Termite_cockroach_cluster_1;Termite_cockroach_cluster_1_unclassified;Termite_cockroach_cluster_1_unclassified;
649	Firmicutes;Clostridia_1;Clostridiales;Family_XIII_Incertae_Sedis;Family_XIII_Incertae_Sedis_unclassified;Family_XIII_Incertae_Sedis_unclassified;Family_XIII_Incertae_Sedis_unclassified;
650	Firmicutes;Clostridia_1;Clostridiales;Lachnospiraceae;Candidatus_Arthromitus;Candidatus_Arthromitus_unclassified;Candidatus_Arthromitus_unclassified;.1
651	Firmicutes;Clostridia_1;Clostridiales;Lachnospiraceae;Candidatus_Arthromitus;Candidatus_Arthromitus_unclassified;Candidatus_Arthromitus_unclassified;.5
652	Firmicutes;Clostridia_1;Clostridiales;Lachnospiraceae;Candidatus_Arthromitus;Candidatus_Arthromitus_unclassified;Candidatus_Arthromitus_unclassified;
653	Firmicutes;Clostridia_1;Clostridiales;Lachnospiraceae;Candidatus_Arthromitus;Candidatus_Arthromitus_unclassified;Candidatus_Arthromitus_unclassified;
654	Firmicutes;Clostridia_1;Clostridiales;Lachnospiraceae;Gut_cluster_1;Gut_cluster_1_unclassified;Gut_cluster_1_unclassified;
655	Firmicutes;Clostridia_1;Clostridiales;Lachnospiraceae;Gut_cluster_13;Gut_cluster_13_unclassified;Gut_cluster_13_unclassified;
656	Firmicutes;Clostridia_1;Clostridiales;Lachnospiraceae;Gut_cluster_13;Gut_cluster_13_unclassified;Gut_cluster_13_unclassified;.1
657	Firmicutes;Clostridia_1;Clostridiales;Lachnospiraceae;Gut_cluster_13;Gut_cluster_13_unclassified;Gut_cluster_13_unclassified;.10
658	Firmicutes;Clostridia_1;Clostridiales;Lachnospiraceae;Gut_cluster_13;Gut_cluster_13_unclassified;Gut_cluster_13_unclassified;.11
659	Firmicutes;Clostridia_1;Clostridiales;Lachnospiraceae;Gut_cluster_13;Gut_cluster_13_unclassified;Gut_cluster_13_unclassified;.12
660	Firmicutes;Clostridia_1;Clostridiales;Lachnospiraceae;Gut_cluster_13;Gut_cluster_13_unclassified;Gut_cluster_13_unclassified;.13
661	Firmicutes;Clostridia_1;Clostridiales;Lachnospiraceae;Gut_cluster_13;Gut_cluster_13_unclassified;Gut_cluster_13_unclassified;.14
662	Firmicutes;Clostridia_1;Clostridiales;Lachnospiraceae;Gut_cluster_13;Gut_cluster_13_unclassified;Gut_cluster_13_unclassified;.16
663	Firmicutes;Clostridia_1;Clostridiales;Lachnospiraceae;Gut_cluster_13;Gut_cluster_13_unclassified;Gut_cluster_13_unclassified;.17
664	Firmicutes;Clostridia_1;Clostridiales;Lachnospiraceae;Gut_cluster_13;Gut_cluster_13_unclassified;Gut_cluster_13_unclassified;.18
665	Firmicutes;Clostridia_1;Clostridiales;Lachnospiraceae;Gut_cluster_13;Gut_cluster_13_unclassified;Gut_cluster_13_unclassified;.19
666	Firmicutes;Clostridia_1;Clostridiales;Lachnospiraceae;Gut_cluster_13;Gut_cluster_13_unclassified;Gut_cluster_13_unclassified;.2
667	Firmicutes;Clostridia_1;Clostridiales;Lachnospiraceae;Gut_cluster_13;Gut_cluster_13_unclassified;Gut_cluster_13_unclassified;.20
668	Firmicutes;Clostridia_1;Clostridiales;Lachnospiraceae;Gut_cluster_13;Gut_cluster_13_unclassified;Gut_cluster_13_unclassified;.23
669	Firmicutes;Clostridia_1;Clostridiales;Lachnospiraceae;Gut_cluster_13;Gut_cluster_13_unclassified;Gut_cluster_13_unclassified;.24
670	Firmicutes;Clostridia_1;Clostridiales;Lachnospiraceae;Gut_cluster_13;Gut_cluster_13_unclassified;Gut_cluster_13_unclassified;.29
671	Firmicutes;Clostridia_1;Clostridiales;Lachnospiraceae;Gut_cluster_13;Gut_cluster_13_unclassified;Gut_cluster_13_unclassified;.3
672	Firmicutes;Clostridia_1;Clostridiales;Lachnospiraceae;Gut_cluster_13;Gut_cluster_13_unclassified;Gut_cluster_13_unclassified;.4
673	Firmicutes;Clostridia_1;Clostridiales;Lachnospiraceae;Gut_cluster_13;Gut_cluster_13_unclassified;Gut_cluster_13_unclassified;.5
674	Firmicutes;Clostridia_1;Clostridiales;Lachnospiraceae;Gut_cluster_13;Gut_cluster_13_unclassified;Gut_cluster_13_unclassified;.58
675	Firmicutes;Clostridia_1;Clostridiales;Lachnospiraceae;Gut_cluster_13;Gut_cluster_13_unclassified;Gut_cluster_13_unclassified;.6
676	Firmicutes;Clostridia_1;Clostridiales;Lachnospiraceae;Gut_cluster_13;Gut_cluster_13_unclassified;Gut_cluster_13_unclassified;.7
677	Firmicutes;Clostridia_1;Clostridiales;Lachnospiraceae;Gut_cluster_13;Gut_cluster_13_unclassified;Gut_cluster_13_unclassified;.8
678	Firmicutes;Clostridia_1;Clostridiales;Lachnospiraceae;Gut_cluster_13;Gut_cluster_13_unclassified;Gut_cluster_13_unclassified;.9
679	Firmicutes;Clostridia_1;Clostridiales;Lachnospiraceae;Gut_cluster_13;Gut_cluster_13_unclassified;Gut_cluster_13_unclassified;
680	Firmicutes;Clostridia_1;Clostridiales;Lachnospiraceae;Gut_cluster_15;Gut_cluster_15_unclassified;Gut_cluster_15_unclassified;
681	Firmicutes;Clostridia_1;Clostridiales;Lachnospiraceae;Lachnospiraceae_unclassified;Lachnospiraceae_unclassified;Lachnospiraceae_unclassified;
682	Firmicutes;Clostridia_1;Clostridiales;Lachnospiraceae;Lachnospiraceae_unclassified;Lachnospiraceae_unclassified;Lachnospiraceae_unclassified;.103
683	Firmicutes;Clostridia_1;Clostridiales;Lachnospiraceae;Lachnospiraceae_unclassified;Lachnospiraceae_unclassified;Lachnospiraceae_unclassified;.15
684	Firmicutes;Clostridia_1;Clostridiales;Lachnospiraceae;Lachnospiraceae_unclassified;Lachnospiraceae_unclassified;Lachnospiraceae_unclassified;.17
685	Firmicutes;Clostridia_1;Clostridiales;Lachnospiraceae;Lachnospiraceae_unclassified;Lachnospiraceae_unclassified;Lachnospiraceae_unclassified;.18
686	Firmicutes;Clostridia_1;Clostridiales;Lachnospiraceae;Lachnospiraceae_unclassified;Lachnospiraceae_unclassified;Lachnospiraceae_unclassified;.2
687	Firmicutes;Clostridia_1;Clostridiales;Lachnospiraceae;Lachnospiraceae_unclassified;Lachnospiraceae_unclassified;Lachnospiraceae_unclassified;.24
688	Firmicutes;Clostridia_1;Clostridiales;Lachnospiraceae;Lachnospiraceae_unclassified;Lachnospiraceae_unclassified;Lachnospiraceae_unclassified;.26
689	Firmicutes;Clostridia_1;Clostridiales;Lachnospiraceae;Lachnospiraceae_unclassified;Lachnospiraceae_unclassified;Lachnospiraceae_unclassified;.27
690	Firmicutes;Clostridia_1;Clostridiales;Lachnospiraceae;Lachnospiraceae_unclassified;Lachnospiraceae_unclassified;Lachnospiraceae_unclassified;.30
691	Firmicutes;Clostridia_1;Clostridiales;Lachnospiraceae;Lachnospiraceae_unclassified;Lachnospiraceae_unclassified;Lachnospiraceae_unclassified;.31
692	Firmicutes;Clostridia_1;Clostridiales;Lachnospiraceae;Lachnospiraceae_unclassified;Lachnospiraceae_unclassified;Lachnospiraceae_unclassified;.37
693	Firmicutes;Clostridia_1;Clostridiales;Lachnospiraceae;Lachnospiraceae_unclassified;Lachnospiraceae_unclassified;Lachnospiraceae_unclassified;.40
694	Firmicutes;Clostridia_1;Clostridiales;Lachnospiraceae;Lachnospiraceae_unclassified;Lachnospiraceae_unclassified;Lachnospiraceae_unclassified;.41
695	Firmicutes;Clostridia_1;Clostridiales;Lachnospiraceae;Lachnospiraceae_unclassified;Lachnospiraceae_unclassified;Lachnospiraceae_unclassified;.46
696	Firmicutes;Clostridia_1;Clostridiales;Lachnospiraceae;Lachnospiraceae_unclassified;Lachnospiraceae_unclassified;Lachnospiraceae_unclassified;.54
697	Firmicutes;Clostridia_1;Clostridiales;Lachnospiraceae;Lachnospiraceae_unclassified;Lachnospiraceae_unclassified;Lachnospiraceae_unclassified;.6
698	Firmicutes;Clostridia_1;Clostridiales;Lachnospiraceae;Lachnospiraceae_unclassified;Lachnospiraceae_unclassified;Lachnospiraceae_unclassified;.83
699	Firmicutes;Clostridia_1;Clostridiales;Lachnospiraceae;Lachnospiraceae_unclassified;Lachnospiraceae_unclassified;Lachnospiraceae_unclassified;.95
700	Firmicutes;Clostridia_1;Clostridiales;Lachnospiraceae;Lachnospiraceae_unclassified;Lachnospiraceae_unclassified;Lachnospiraceae_unclassified;
701	Firmicutes;Clostridia_1;Clostridiales;Lachnospiraceae;Lachnospiraceae_unclassified;Lachnospiraceae_unclassified;Lachnospiraceae_unclassified;
702	Firmicutes;Clostridia_1;Clostridiales;Lachnospiraceae;Lachnospiraceae_unclassified;Lachnospiraceae_unclassified;Lachnospiraceae_unclassified;
703	Firmicutes;Clostridia_1;Clostridiales;Lachnospiraceae;Lachnospiraceae_unclassified;Lachnospiraceae_unclassified;Lachnospiraceae_unclassified;
704	Firmicutes;Clostridia_1;Clostridiales;Lachnospiraceae;Lachnospiraceae_unclassified;Lachnospiraceae_unclassified;Lachnospiraceae_unclassified;
705	Firmicutes;Clostridia_1;Clostridiales;Lachnospiraceae;Parasporobacterium-Sporobacterium;Parasporobacterium-Sporobacterium_unclassified;Parasporobacterium-Sporobacterium_unclassified;
706	Firmicutes;Clostridia_1;Clostridiales;Lachnospiraceae;Parasporobacterium-Sporobacterium;Parasporobacterium-Sporobacterium_unclassified;Parasporobacterium-Sporobacterium_unclassified;.1
707	Firmicutes;Clostridia_1;Clostridiales;Lachnospiraceae;Robinsoniella_Insects;Robinsoniella_Insects_unclassified;Robinsoniella_Insects_unclassified;
708	Firmicutes;Clostridia_1;Clostridiales;Lachnospiraceae;Robinsoniella_Insects;Robinsoniella_Insects_unclassified;Robinsoniella_Insects_unclassified;.1
709	Firmicutes;Clostridia_1;Clostridiales;Lachnospiraceae;Robinsoniella_Insects;Robinsoniella_Insects_unclassified;Robinsoniella_Insects_unclassified;.2
710	Firmicutes;Clostridia_1;Clostridiales;Lachnospiraceae;Uncultured_58;Uncultured_58_unclassified;Uncultured_58_unclassified;
711	Firmicutes;Clostridia_1;Clostridiales;Lachnospiraceae;Gut_cluster_13;Gut_cluster_13_unclassified;Gut_cluster_13_unclassified;
712	Firmicutes;Clostridia_1;Clostridiales;Lachnospiraceae;Lachnospiraceae_unclassified;Lachnospiraceae_unclassified;Lachnospiraceae_unclassified;
713	Firmicutes;Clostridia_1;Clostridiales;Lachnospiraceae;Catabacter;Catabacter_unclassified;Catabacter_unclassified;
714	Firmicutes;Clostridia_1;Clostridiales;Lachnospiraceae;Gut_cluster_13;Gut_cluster_13_unclassified;Gut_cluster_13_unclassified;
715	Firmicutes;Clostridia_1;Clostridiales;Peptostreptococcaceae;Peptostreptococcaceae_unclassified;Peptostreptococcaceae_unclassified;Peptostreptococcaceae_unclassified;
716	Firmicutes;Clostridia_1;Clostridiales;Peptostreptococcaceae;Peptostreptococcaceae_unclassified;Peptostreptococcaceae_unclassified;Peptostreptococcaceae_unclassified;.1
717	Firmicutes;Clostridia_1;Clostridiales;Ruminococcaceae;Anaerotruncus;Anaerotruncus_unclassified;Anaerotruncus_unclassified;
718	Firmicutes;Clostridia_1;Clostridiales;Ruminococcaceae;Anaerotruncus;Anaerotruncus_unclassified;Anaerotruncus_unclassified;.1
719	Firmicutes;Clostridia_1;Clostridiales;Ruminococcaceae;Anaerotruncus;Anaerotruncus_unclassified;Anaerotruncus_unclassified;
720	Firmicutes;Clostridia_1;Clostridiales;Ruminococcaceae;Gut_cluster_1;Gut_cluster_1_unclassified;Gut_cluster_1_unclassified;
721	Firmicutes;Clostridia_1;Clostridiales;Ruminococcaceae;Gut_cluster_1;Gut_cluster_1_unclassified;Gut_cluster_1_unclassified;.3
722	Firmicutes;Clostridia_1;Clostridiales;Ruminococcaceae;Gut_cluster_3;Gut_cluster_3_unclassified;Gut_cluster_3_unclassified;
723	Firmicutes;Clostridia_1;Clostridiales;Ruminococcaceae;Gut_cluster_4;Gut_cluster_4_unclassified;Gut_cluster_4_unclassified;.2
724	Firmicutes;Clostridia_1;Clostridiales;Ruminococcaceae;Gut_cluster_4;Gut_cluster_4_unclassified;Gut_cluster_4_unclassified;.3
725	Firmicutes;Clostridia_1;Clostridiales;Ruminococcaceae;Gut_cluster_5;Gut_cluster_5_unclassified;Gut_cluster_5_unclassified;
726	Firmicutes;Clostridia_1;Clostridiales;Ruminococcaceae;Gut_cluster_5;Gut_cluster_5_unclassified;Gut_cluster_5_unclassified;
727	Firmicutes;Clostridia_1;Clostridiales;Ruminococcaceae;Gut_cluster_7;Gut_cluster_7_unclassified;Gut_cluster_7_unclassified;
728	Firmicutes;Clostridia_1;Clostridiales;Ruminococcaceae;Gut_cluster_8;Gut_cluster_8_unclassified;Gut_cluster_8_unclassified;
729	Firmicutes;Clostridia_1;Clostridiales;Ruminococcaceae;Hydrogenoanaerobacterium;Hydrogenoanaerobacterium_unclassified;Hydrogenoanaerobacterium_unclassified;
730	Firmicutes;Clostridia_1;Clostridiales;Ruminococcaceae;Incertae_Sedis_5;Incertae_Sedis_5_unclassified;Incertae_Sedis_5_unclassified;
731	Firmicutes;Clostridia_1;Clostridiales;Ruminococcaceae;Incertae_Sedis_5;Incertae_Sedis_5_unclassified;Incertae_Sedis_5_unclassified;
732	Firmicutes;Clostridia_1;Clostridiales;Ruminococcaceae;Incertae_Sedis_6;Incertae_Sedis_6_unclassified;Incertae_Sedis_6_unclassified;
733	Firmicutes;Clostridia_1;Clostridiales;Ruminococcaceae;Incertae_Sedis_6;Intestinimonas;Intestinimonas_unclassified;
734	Firmicutes;Clostridia_1;Clostridiales;Ruminococcaceae;Incertae_Sedis_7;Incertae_Sedis_7_unclassified;Incertae_Sedis_7_unclassified;
735	Firmicutes;Clostridia_1;Clostridiales;Ruminococcaceae;Insect_cluster;Insect_cluster_unclassified;Insect_cluster_unclassified;
736	Firmicutes;Clostridia_1;Clostridiales;Ruminococcaceae;Insect_cluster;Insect_cluster_unclassified;Insect_cluster_unclassified;.1
737	Firmicutes;Clostridia_1;Clostridiales;Ruminococcaceae;Insect_cluster;Insect_cluster_unclassified;Insect_cluster_unclassified;.14
738	Firmicutes;Clostridia_1;Clostridiales;Ruminococcaceae;Insect_cluster;Insect_cluster_unclassified;Insect_cluster_unclassified;.17
739	Firmicutes;Clostridia_1;Clostridiales;Ruminococcaceae;Insect_cluster;Insect_cluster_unclassified;Insect_cluster_unclassified;.4
740	Firmicutes;Clostridia_1;Clostridiales;Ruminococcaceae;Insect_cluster;Insect_cluster_unclassified;Insect_cluster_unclassified;.58
741	Firmicutes;Clostridia_1;Clostridiales;Ruminococcaceae;Insect_cluster;Insect_cluster_unclassified;Insect_cluster_unclassified;.6
742	Firmicutes;Clostridia_1;Clostridiales;Ruminococcaceae;Insect_cluster;Insect_cluster_unclassified;Insect_cluster_unclassified;.9
743	Firmicutes;Clostridia_1;Clostridiales;Ruminococcaceae;Insect_cluster;Insect_cluster_unclassified;Insect_cluster_unclassified;
744	Firmicutes;Clostridia_1;Clostridiales;Ruminococcaceae;Insect_cluster;Insect_cluster_unclassified;Insect_cluster_unclassified;
745	Firmicutes;Clostridia_1;Clostridiales;Ruminococcaceae;Insect_cluster;Insect_cluster_unclassified;Insect_cluster_unclassified;
746	Firmicutes;Clostridia_1;Clostridiales;Ruminococcaceae;Insect_cluster;Insect_cluster_unclassified;Insect_cluster_unclassified;
747	Firmicutes;Clostridia_1;Clostridiales;Ruminococcaceae;Insect_cluster;Insect_cluster_unclassified;Insect_cluster_unclassified;
748	Firmicutes;Clostridia_1;Clostridiales;Ruminococcaceae;Insect_cluster;Insect_cluster_unclassified;Insect_cluster_unclassified;.3
749	Firmicutes;Clostridia_1;Clostridiales;Ruminococcaceae;Papillibacter;Papillibacter_unclassified;Papillibacter_unclassified;
750	Firmicutes;Clostridia_1;Clostridiales;Ruminococcaceae;Ruminococcaceae_unclassified;Ruminococcaceae_unclassified;Ruminococcaceae_unclassified;
751	Firmicutes;Clostridia_1;Clostridiales;Ruminococcaceae;Ruminococcaceae_unclassified;Ruminococcaceae_unclassified;Ruminococcaceae_unclassified;.10
752	Firmicutes;Clostridia_1;Clostridiales;Ruminococcaceae;Ruminococcaceae_unclassified;Ruminococcaceae_unclassified;Ruminococcaceae_unclassified;.118
753	Firmicutes;Clostridia_1;Clostridiales;Ruminococcaceae;Ruminococcaceae_unclassified;Ruminococcaceae_unclassified;Ruminococcaceae_unclassified;.138
754	Firmicutes;Clostridia_1;Clostridiales;Ruminococcaceae;Ruminococcaceae_unclassified;Ruminococcaceae_unclassified;Ruminococcaceae_unclassified;.15
755	Firmicutes;Clostridia_1;Clostridiales;Ruminococcaceae;Ruminococcaceae_unclassified;Ruminococcaceae_unclassified;Ruminococcaceae_unclassified;.17
756	Firmicutes;Clostridia_1;Clostridiales;Ruminococcaceae;Ruminococcaceae_unclassified;Ruminococcaceae_unclassified;Ruminococcaceae_unclassified;.2
757	Firmicutes;Clostridia_1;Clostridiales;Ruminococcaceae;Ruminococcaceae_unclassified;Ruminococcaceae_unclassified;Ruminococcaceae_unclassified;.23
758	Firmicutes;Clostridia_1;Clostridiales;Ruminococcaceae;Ruminococcaceae_unclassified;Ruminococcaceae_unclassified;Ruminococcaceae_unclassified;.26
759	Firmicutes;Clostridia_1;Clostridiales;Ruminococcaceae;Ruminococcaceae_unclassified;Ruminococcaceae_unclassified;Ruminococcaceae_unclassified;.303
760	Firmicutes;Clostridia_1;Clostridiales;Ruminococcaceae;Ruminococcaceae_unclassified;Ruminococcaceae_unclassified;Ruminococcaceae_unclassified;.40
761	Firmicutes;Clostridia_1;Clostridiales;Ruminococcaceae;Ruminococcaceae_unclassified;Ruminococcaceae_unclassified;Ruminococcaceae_unclassified;.43
762	Firmicutes;Clostridia_1;Clostridiales;Ruminococcaceae;Ruminococcaceae_unclassified;Ruminococcaceae_unclassified;Ruminococcaceae_unclassified;.48
763	Firmicutes;Clostridia_1;Clostridiales;Ruminococcaceae;Ruminococcaceae_unclassified;Ruminococcaceae_unclassified;Ruminococcaceae_unclassified;.57
764	Firmicutes;Clostridia_1;Clostridiales;Ruminococcaceae;Ruminococcaceae_unclassified;Ruminococcaceae_unclassified;Ruminococcaceae_unclassified;.60
765	Firmicutes;Clostridia_1;Clostridiales;Ruminococcaceae;Ruminococcaceae_unclassified;Ruminococcaceae_unclassified;Ruminococcaceae_unclassified;.604
766	Firmicutes;Clostridia_1;Clostridiales;Ruminococcaceae;Ruminococcaceae_unclassified;Ruminococcaceae_unclassified;Ruminococcaceae_unclassified;.66
767	Firmicutes;Clostridia_1;Clostridiales;Ruminococcaceae;Ruminococcaceae_unclassified;Ruminococcaceae_unclassified;Ruminococcaceae_unclassified;.75
768	Firmicutes;Clostridia_1;Clostridiales;Ruminococcaceae;Ruminococcaceae_unclassified;Ruminococcaceae_unclassified;Ruminococcaceae_unclassified;.9
769	Firmicutes;Clostridia_1;Clostridiales;Ruminococcaceae;Ruminococcaceae_unclassified;Ruminococcaceae_unclassified;Ruminococcaceae_unclassified;
770	Firmicutes;Clostridia_1;Clostridiales;Ruminococcaceae;Ruminococcaceae_unclassified;Ruminococcaceae_unclassified;Ruminococcaceae_unclassified;.1
771	Firmicutes;Clostridia_1;Clostridiales;Ruminococcaceae;Ruminococcaceae_unclassified;Ruminococcaceae_unclassified;Ruminococcaceae_unclassified;
772	Firmicutes;Clostridia_1;Clostridiales;Ruminococcaceae;Ruminococcaceae_unclassified;Ruminococcaceae_unclassified;Ruminococcaceae_unclassified;
773	Firmicutes;Clostridia_1;Clostridiales;Ruminococcaceae;Ruminococcaceae_unclassified;Ruminococcaceae_unclassified;Ruminococcaceae_unclassified;
774	Firmicutes;Clostridia_1;Clostridiales;Ruminococcaceae;Ruminococcaceae_unclassified;Ruminococcaceae_unclassified;Ruminococcaceae_unclassified;.1
775	Firmicutes;Clostridia_1;Clostridiales;Ruminococcaceae;Ruminococcaceae_unclassified;Ruminococcaceae_unclassified;Ruminococcaceae_unclassified;
776	Firmicutes;Clostridia_1;Clostridiales;Ruminococcaceae;Ruminococcaceae_unclassified;Ruminococcaceae_unclassified;Ruminococcaceae_unclassified;
777	Firmicutes;Clostridia_1;Clostridiales;Ruminococcaceae;Ruminococcaceae_unclassified;Ruminococcaceae_unclassified;Ruminococcaceae_unclassified;
778	Firmicutes;Clostridia_1;Clostridiales;Ruminococcaceae;Ruminococcaceae_unclassified;Ruminococcaceae_unclassified;Ruminococcaceae_unclassified;.2
779	Firmicutes;Clostridia_1;Clostridiales;Ruminococcaceae;Ruminococcus_1;Ruminococcus_1_unclassified;Ruminococcus_1_unclassified;.7
780	Firmicutes;Clostridia_1;Clostridiales;Ruminococcaceae;Termite_cockroach_cluster;Termite_cockroach_cluster_unclassified;Termite_cockroach_cluster_unclassified;*
781	Firmicutes;Clostridia_1;Clostridiales;Ruminococcaceae;Termite_cockroach_cluster;Termite_cockroach_cluster_unclassified;Termite_cockroach_cluster_unclassified;.1
782	Firmicutes;Clostridia_1;Clostridiales;Ruminococcaceae;Termite_cockroach_cluster;Termite_cockroach_cluster_unclassified;Termite_cockroach_cluster_unclassified;.10
783	Firmicutes;Clostridia_1;Clostridiales;Ruminococcaceae;Termite_cockroach_cluster;Termite_cockroach_cluster_unclassified;Termite_cockroach_cluster_unclassified;.13
784	Firmicutes;Clostridia_1;Clostridiales;Ruminococcaceae;Termite_cockroach_cluster;Termite_cockroach_cluster_unclassified;Termite_cockroach_cluster_unclassified;.17
785	Firmicutes;Clostridia_1;Clostridiales;Ruminococcaceae;Termite_cockroach_cluster;Termite_cockroach_cluster_unclassified;Termite_cockroach_cluster_unclassified;.19
786	Firmicutes;Clostridia_1;Clostridiales;Ruminococcaceae;Termite_cockroach_cluster;Termite_cockroach_cluster_unclassified;Termite_cockroach_cluster_unclassified;.2
787	Firmicutes;Clostridia_1;Clostridiales;Ruminococcaceae;Termite_cockroach_cluster;Termite_cockroach_cluster_unclassified;Termite_cockroach_cluster_unclassified;.23
788	Firmicutes;Clostridia_1;Clostridiales;Ruminococcaceae;Termite_cockroach_cluster;Termite_cockroach_cluster_unclassified;Termite_cockroach_cluster_unclassified;.3
789	Firmicutes;Clostridia_1;Clostridiales;Ruminococcaceae;Termite_cockroach_cluster;Termite_cockroach_cluster_unclassified;Termite_cockroach_cluster_unclassified;.34
790	Firmicutes;Clostridia_1;Clostridiales;Ruminococcaceae;Termite_cockroach_cluster;Termite_cockroach_cluster_unclassified;Termite_cockroach_cluster_unclassified;.4
791	Firmicutes;Clostridia_1;Clostridiales;Ruminococcaceae;Termite_cockroach_cluster;Termite_cockroach_cluster_unclassified;Termite_cockroach_cluster_unclassified;.49
792	Firmicutes;Clostridia_1;Clostridiales;Ruminococcaceae;Termite_cockroach_cluster;Termite_cockroach_cluster_unclassified;Termite_cockroach_cluster_unclassified;.5
793	Firmicutes;Clostridia_1;Clostridiales;Ruminococcaceae;Termite_cockroach_cluster;Termite_cockroach_cluster_unclassified;Termite_cockroach_cluster_unclassified;.6
794	Firmicutes;Clostridia_1;Clostridiales;Ruminococcaceae;Termite_cockroach_cluster;Termite_cockroach_cluster_unclassified;Termite_cockroach_cluster_unclassified;.7
795	Firmicutes;Clostridia_1;Clostridiales;Ruminococcaceae;Termite_cockroach_cluster;Termite_cockroach_cluster_unclassified;Termite_cockroach_cluster_unclassified;.8
796	Firmicutes;Clostridia_1;Clostridiales;Ruminococcaceae;Termite_cockroach_cluster;Termite_cockroach_cluster_unclassified;Termite_cockroach_cluster_unclassified;.9
797	Firmicutes;Clostridia_1;Clostridiales;Ruminococcaceae;Termite_cockroach_cluster;Termite_cockroach_cluster_unclassified;Termite_cockroach_cluster_unclassified;
798	Firmicutes;Clostridia_1;Clostridiales;Ruminococcaceae;Termite_cockroach_cluster;Termite_cockroach_cluster_unclassified;Termite_cockroach_cluster_unclassified;
799	Firmicutes;Clostridia_1;Clostridiales;Ruminococcaceae;Uncultured_12;Uncultured_12_unclassified;Uncultured_12_unclassified;
800	Firmicutes;Clostridia_1;Clostridiales;Ruminococcaceae;Uncultured_12;Uncultured_12_unclassified;Uncultured_12_unclassified;.1
801	Firmicutes;Clostridia_1;Clostridiales;Ruminococcaceae;Uncultured_12;Uncultured_12_unclassified;Uncultured_12_unclassified;.11
802	Firmicutes;Clostridia_1;Clostridiales;Ruminococcaceae;Uncultured_12;Uncultured_12_unclassified;Uncultured_12_unclassified;.13
803	Firmicutes;Clostridia_1;Clostridiales;Ruminococcaceae;Uncultured_12;Uncultured_12_unclassified;Uncultured_12_unclassified;.27
804	Firmicutes;Clostridia_1;Clostridiales;Ruminococcaceae;Uncultured_12;Uncultured_12_unclassified;Uncultured_12_unclassified;.29
805	Firmicutes;Clostridia_1;Clostridiales;Ruminococcaceae;Uncultured_12;Uncultured_12_unclassified;Uncultured_12_unclassified;.4
806	Firmicutes;Clostridia_1;Clostridiales;Ruminococcaceae;Uncultured_12;Uncultured_12_unclassified;Uncultured_12_unclassified;.9
807	Firmicutes;Clostridia_1;Clostridiales;Ruminococcaceae;Uncultured_12;Uncultured_12_unclassified;Uncultured_12_unclassified;
808	Firmicutes;Clostridia_1;Clostridiales;Ruminococcaceae;Uncultured_24;Uncultured_24_unclassified;Uncultured_24_unclassified;
809	Firmicutes;Clostridia_1;Clostridiales;Ruminococcaceae;Uncultured_28;Uncultured_28_unclassified;Uncultured_28_unclassified;
810	Firmicutes;Clostridia_1;Clostridiales;Ruminococcaceae;Uncultured_28;Uncultured_28_unclassified;Uncultured_28_unclassified;.1
811	Firmicutes;Clostridia_1;Clostridiales;Ruminococcaceae;Uncultured_28;Uncultured_28_unclassified;Uncultured_28_unclassified;.2
812	Firmicutes;Clostridia_1;Clostridiales;Ruminococcaceae;Uncultured_28;Uncultured_28_unclassified;Uncultured_28_unclassified;.4
813	Firmicutes;Clostridia_1;Clostridiales;Ruminococcaceae;Uncultured_28;Uncultured_28_unclassified;Uncultured_28_unclassified;.6
814	Firmicutes;Clostridia_1;Clostridiales;Ruminococcaceae;Uncultured_28;Uncultured_28_unclassified;Uncultured_28_unclassified;
815	Firmicutes;Clostridia_2;Clostridiales_1;OPB54;OPB54_unclassified;OPB54_unclassified;OPB54_unclassified;.1
816	Firmicutes;Clostridia_2;Clostridiales_1;Peptococcaceae_1;Peptococcaceae_1_unclassified;Peptococcaceae_1_unclassified;Peptococcaceae_1_unclassified;
817	Firmicutes;Clostridia_2;Clostridiales_1;Peptococcaceae_1;Uncultured_2;Uncultured_2_unclassified;Uncultured_2_unclassified;
818	Firmicutes;Clostridia_2;Clostridiales_1;Peptococcaceae_1;Uncultured_2;Uncultured_2_unclassified;Uncultured_2_unclassified;.1
819	Firmicutes;Clostridia_2;Clostridiales_1;Peptococcaceae_1;Uncultured_2;Uncultured_2_unclassified;Uncultured_2_unclassified;.10
820	Firmicutes;Clostridia_2;Clostridiales_1;Peptococcaceae_1;Uncultured_2;Uncultured_2_unclassified;Uncultured_2_unclassified;.11
821	Firmicutes;Clostridia_2;Clostridiales_1;Peptococcaceae_1;Uncultured_2;Uncultured_2_unclassified;Uncultured_2_unclassified;.2
822	Firmicutes;Clostridia_2;Clostridiales_1;Peptococcaceae_1;Uncultured_2;Uncultured_2_unclassified;Uncultured_2_unclassified;.3
823	Firmicutes;Clostridia_2;Clostridiales_1;Peptococcaceae_1;Uncultured_2;Uncultured_2_unclassified;Uncultured_2_unclassified;.4
824	Firmicutes;Clostridia_2;Clostridiales_1;Peptococcaceae_1;Uncultured_2;Uncultured_2_unclassified;Uncultured_2_unclassified;.6
825	Firmicutes;Clostridia_2;Clostridiales_1;Peptococcaceae_1;Uncultured_2;Uncultured_2_unclassified;Uncultured_2_unclassified;
826	Firmicutes;Clostridia_2;Clostridiales_1;Peptococcaceae_1;Uncultured_3;Uncultured_3_unclassified;Uncultured_3_unclassified;.1
827	Firmicutes;Clostridia_2;Clostridiales_1;Peptococcaceae_2;Desulfosporosinus;Desulfosporosinus_unclassified;Desulfosporosinus_unclassified;
828	Firmicutes;Clostridia_2;Clostridiales_1;Peptococcaceae_2;Desulfosporosinus;Desulfosporosinus_unclassified;Desulfosporosinus_unclassified;.1
829	Firmicutes;Clostridia_2;Clostridiales_1;Peptococcaceae_3;Pelotomaculum_3;Pelotomaculum_3_unclassified;Pelotomaculum_3_unclassified;
830	Firmicutes;Clostridia_2;Clostridiales_1;Peptococcaceae_3;Pelotomaculum_3;Pelotomaculum_3_unclassified;Pelotomaculum_3_unclassified;.1
831	Firmicutes;Clostridia_2;Clostridiales_1;Veillonellaceae;Acetonema_a;Acetonema_a_unclassified;Acetonema_a_unclassified;
832	Firmicutes;Clostridia_2;Clostridiales_1;Veillonellaceae;Uncultured_7;Uncultured_7_unclassified;Uncultured_7_unclassified;.1
833	Firmicutes;Clostridia_2;Clostridiales_1;Veillonellaceae;Uncultured_7;Uncultured_7_unclassified;Uncultured_7_unclassified;.2
834	Firmicutes;Clostridia_2;Clostridiales_1;Veillonellaceae;Uncultured_7;Uncultured_7_unclassified;Uncultured_7_unclassified;.3
835	Firmicutes;Clostridia_2;Clostridiales_1;Veillonellaceae;Uncultured_8;Uncultured_8_unclassified;Uncultured_8_unclassified;
836	Firmicutes;Clostridia_2;Clostridiales;Syntrophomonadaceae;Syntrophomonadaceae_unclassified;Syntrophomonadaceae_unclassified;Syntrophomonadaceae_unclassified;
837	Firmicutes;Clostridia_2;Clostridiales;Syntrophomonadaceae;Syntrophomonadaceae_unclassified;Syntrophomonadaceae_unclassified;Syntrophomonadaceae_unclassified;.3
838	Firmicutes;Clostridia_2;Clostridiales;Syntrophomonadaceae;Syntrophomonadaceae_unclassified;Syntrophomonadaceae_unclassified;Syntrophomonadaceae_unclassified;.4
839	Firmicutes;Erysipelotrichi;Erysipelotrichales;Erysipelotrichaceae;Erysipelotrichaceae_unclassified;Erysipelotrichaceae_unclassified;Erysipelotrichaceae_unclassified;
840	Firmicutes;Erysipelotrichi;Erysipelotrichales;Erysipelotrichaceae;Erysipelotrichaceae_unclassified;Erysipelotrichaceae_unclassified;Erysipelotrichaceae_unclassified;.10
841	Firmicutes;Erysipelotrichi;Erysipelotrichales;Erysipelotrichaceae;Erysipelotrichaceae_unclassified;Erysipelotrichaceae_unclassified;Erysipelotrichaceae_unclassified;.5
842	Firmicutes;Erysipelotrichi;Erysipelotrichales;Erysipelotrichaceae;Incertae_Sedis_8;Incertae_Sedis_8_unclassified;Incertae_Sedis_8_unclassified;
843	Firmicutes;Erysipelotrichi;Erysipelotrichales;Erysipelotrichaceae;Incertae_Sedis_8;Incertae_Sedis_8_unclassified;Incertae_Sedis_8_unclassified;.1
844	Firmicutes;Erysipelotrichi;Erysipelotrichales;Erysipelotrichaceae;Incertae_Sedis_8;Incertae_Sedis_8_unclassified;Incertae_Sedis_8_unclassified;.2
845	Firmicutes;Erysipelotrichi;Erysipelotrichales;Erysipelotrichaceae;Uncultured_12;Uncultured_12_unclassified;Uncultured_12_unclassified;
846	Firmicutes;Erysipelotrichi;Erysipelotrichales;Erysipelotrichaceae;Uncultured_3;Uncultured_3_unclassified;Uncultured_3_unclassified;
847	Firmicutes;Erysipelotrichi;Erysipelotrichales;Erysipelotrichaceae;Uncultured_3;Uncultured_3_unclassified;Uncultured_3_unclassified;.1
848	Firmicutes;Erysipelotrichi;Erysipelotrichales;Erysipelotrichaceae;Uncultured_3;Uncultured_3_unclassified;Uncultured_3_unclassified;.3
849	Firmicutes;Erysipelotrichi;Erysipelotrichales;Erysipelotrichaceae;Uncultured_9;Uncultured_9_unclassified;Uncultured_9_unclassified;
850	Firmicutes;Firmicutes_unclassified;Firmicutes_unclassified;Firmicutes_unclassified;Firmicutes_unclassified;Firmicutes_unclassified;Firmicutes_unclassified;
851	Firmicutes;Firmicutes_unclassified;Firmicutes_unclassified;Firmicutes_unclassified;Firmicutes_unclassified;Firmicutes_unclassified;Firmicutes_unclassified;.1
852	Firmicutes;Firmicutes_unclassified;Firmicutes_unclassified;Firmicutes_unclassified;Firmicutes_unclassified;Firmicutes_unclassified;Firmicutes_unclassified;.10
853	Firmicutes;Firmicutes_unclassified;Firmicutes_unclassified;Firmicutes_unclassified;Firmicutes_unclassified;Firmicutes_unclassified;Firmicutes_unclassified;.15
854	Firmicutes;Firmicutes_unclassified;Firmicutes_unclassified;Firmicutes_unclassified;Firmicutes_unclassified;Firmicutes_unclassified;Firmicutes_unclassified;.16
855	Firmicutes;Firmicutes_unclassified;Firmicutes_unclassified;Firmicutes_unclassified;Firmicutes_unclassified;Firmicutes_unclassified;Firmicutes_unclassified;.18
856	Firmicutes;Firmicutes_unclassified;Firmicutes_unclassified;Firmicutes_unclassified;Firmicutes_unclassified;Firmicutes_unclassified;Firmicutes_unclassified;.19
857	Firmicutes;Firmicutes_unclassified;Firmicutes_unclassified;Firmicutes_unclassified;Firmicutes_unclassified;Firmicutes_unclassified;Firmicutes_unclassified;.28
858	Firmicutes;Firmicutes_unclassified;Firmicutes_unclassified;Firmicutes_unclassified;Firmicutes_unclassified;Firmicutes_unclassified;Firmicutes_unclassified;.29
859	Firmicutes;Firmicutes_unclassified;Firmicutes_unclassified;Firmicutes_unclassified;Firmicutes_unclassified;Firmicutes_unclassified;Firmicutes_unclassified;.7
860	Fusobacteria;Fusobacteria;Fusobacteriales;Fusobacteriaceae;Fusobacterium_1;Fusobacterium_1_unclassified;Fusobacterium_1_unclassified;
861	Fusobacteria;Fusobacteria;Fusobacteriales;Fusobacteriaceae;Fusobacterium_1;Fusobacterium_1_unclassified;Fusobacterium_1_unclassified;
862	Gemmatimonadetes;Gemmatimonadetes;BD2-11_terrestrial_group;BD2-11_terrestrial_group_unclassified;BD2-11_terrestrial_group_unclassified;BD2-11_terrestrial_group_unclassified;BD2-11_terrestrial_group_unclassified;.3
863	Gemmatimonadetes;Gemmatimonadetes;BD2-11_terrestrial_group;BD2-11_terrestrial_group_unclassified;BD2-11_terrestrial_group_unclassified;BD2-11_terrestrial_group_unclassified;BD2-11_terrestrial_group_unclassified;.5
864	Gemmatimonadetes;Gemmatimonadetes;Gemmatimonadales;Gemmatimonadaceae;Gemmatimonadaceae_unclassified;Gemmatimonadaceae_unclassified;Gemmatimonadaceae_unclassified;
865	Gemmatimonadetes;Gemmatimonadetes;Gemmatimonadales;Gemmatimonadaceae;Gemmatimonadaceae_unclassified;Gemmatimonadaceae_unclassified;Gemmatimonadaceae_unclassified;.1
866	Gemmatimonadetes;Gemmatimonadetes;Gemmatimonadales;Gemmatimonadaceae;Gemmatimonadaceae_unclassified;Gemmatimonadaceae_unclassified;Gemmatimonadaceae_unclassified;
867	Gemmatimonadetes;Gemmatimonadetes;Gemmatimonadales;Gemmatimonadaceae;Gemmatimonas;Gemmatimonas_unclassified;Gemmatimonas_unclassified;.1
868	Gemmatimonadetes;Gemmatimonadetes;Gemmatimonadales;Gemmatimonadaceae;Gemmatimonas;Gemmatimonas_unclassified;Gemmatimonas_unclassified;.3
869	Gemmatimonadetes;Gemmatimonadetes;Gemmatimonadales;Gemmatimonadaceae;Gemmatimonas;Gemmatimonas_unclassified;Gemmatimonas_unclassified;.9
870	Gemmatimonadetes;Gemmatimonadetes;Gemmatimonadales;Gemmatimonadaceae;Gemmatimonas;Gemmatimonas_unclassified;Gemmatimonas_unclassified;
871	Gemmatimonadetes;Gemmatimonadetes;Gemmatimonadales;Gemmatimonadaceae;Uncultured_1;Uncultured_1_unclassified;Uncultured_1_unclassified;
872	Gemmatimonadetes;Gemmatimonadetes;Gemmatimonadales;Gemmatimonadaceae;Uncultured_1;Uncultured_1_unclassified;Uncultured_1_unclassified;.2
873	Gemmatimonadetes;Gemmatimonadetes;Gemmatimonadales;Gemmatimonadaceae;Uncultured_10;Uncultured_10_unclassified;Uncultured_10_unclassified;
874	Gemmatimonadetes;Gemmatimonadetes;Gemmatimonadales;Gemmatimonadaceae;Uncultured_10;Uncultured_10_unclassified;Uncultured_10_unclassified;.1
875	Gemmatimonadetes;Gemmatimonadetes;Gemmatimonadales;Gemmatimonadaceae;Uncultured_2;Uncultured_2_unclassified;Uncultured_2_unclassified;.1
876	Gemmatimonadetes;Gemmatimonadetes;Gemmatimonadales;Gemmatimonadaceae;Uncultured_7;Uncultured_7_unclassified;Uncultured_7_unclassified;
877	Gemmatimonadetes;Gemmatimonadetes;Gemmatimonadales;Gemmatimonadaceae;Uncultured_7;Uncultured_7_unclassified;Uncultured_7_unclassified;.1
878	Gemmatimonadetes;Gemmatimonadetes;Gemmatimonadales;Gemmatimonadaceae;Uncultured_7;Uncultured_7_unclassified;Uncultured_7_unclassified;.10
879	Gemmatimonadetes;Gemmatimonadetes;Gemmatimonadales;Gemmatimonadaceae;Uncultured_7;Uncultured_7_unclassified;Uncultured_7_unclassified;.2
880	Gemmatimonadetes;Gemmatimonadetes;Gemmatimonadales;Gemmatimonadaceae;Uncultured_7;Uncultured_7_unclassified;Uncultured_7_unclassified;.3
881	Gemmatimonadetes;Gemmatimonadetes;Gemmatimonadales;Gemmatimonadaceae;Uncultured_7;Uncultured_7_unclassified;Uncultured_7_unclassified;.4
882	Gemmatimonadetes;Gemmatimonadetes;Gemmatimonadales;Gemmatimonadaceae;Uncultured_7;Uncultured_7_unclassified;Uncultured_7_unclassified;.7
883	Gemmatimonadetes;Gemmatimonadetes;Gemmatimonadales;Gemmatimonadaceae;Uncultured_7;Uncultured_7_unclassified;Uncultured_7_unclassified;.8
884	Gemmatimonadetes;Gemmatimonadetes;Gemmatimonadales;Gemmatimonadaceae;Uncultured_8;Uncultured_8_unclassified;Uncultured_8_unclassified;
885	Gemmatimonadetes;Gemmatimonadetes;Gemmatimonadales;Gemmatimonadaceae;Uncultured_8;Uncultured_8_unclassified;Uncultured_8_unclassified;.1
886	Gemmatimonadetes;Gemmatimonadetes;Gemmatimonadales;Gemmatimonadaceae;Uncultured_8;Uncultured_8_unclassified;Uncultured_8_unclassified;.2
887	Gemmatimonadetes;Gemmatimonadetes;Gemmatimonadales;Gemmatimonadaceae;Uncultured_9;Uncultured_9_unclassified;Uncultured_9_unclassified;
888	Gemmatimonadetes;Gemmatimonadetes;Gemmatimonadales;Gemmatimonadaceae;Uncultured_9;Uncultured_9_unclassified;Uncultured_9_unclassified;.1
889	Lentisphaerae;Lentisphaeria;DEV055;DEV055_unclassified;DEV055_unclassified;DEV055_unclassified;DEV055_unclassified;
890	Lentisphaerae;Lentisphaeria;PBS-III-20;PBS-III-20_unclassified;PBS-III-20_unclassified;PBS-III-20_unclassified;PBS-III-20_unclassified;
891	Lentisphaerae;Lentisphaeria;PBS-III-20;PBS-III-20_unclassified;PBS-III-20_unclassified;PBS-III-20_unclassified;PBS-III-20_unclassified;.1
892	Lentisphaerae;Lentisphaeria;Victivallales;Victivallaceae;Victivallaceae_unclassified;Victivallaceae_unclassified;Victivallaceae_unclassified;.1
893	Nitrospirae;Nitrospira;Nitrospirales;Cluster_319-6A21;Cluster_319-6A21_unclassified;Cluster_319-6A21_unclassified;Cluster_319-6A21_unclassified;
894	Nitrospirae;Nitrospira;Nitrospirales;Cluster_319-6A21;Cluster_319-6A21_unclassified;Cluster_319-6A21_unclassified;Cluster_319-6A21_unclassified;.1
895	Nitrospirae;Nitrospira;Nitrospirales;Cluster_319-6A21;Cluster_319-6A21_unclassified;Cluster_319-6A21_unclassified;Cluster_319-6A21_unclassified;.11
896	Nitrospirae;Nitrospira;Nitrospirales;Cluster_319-6A21;Cluster_319-6A21_unclassified;Cluster_319-6A21_unclassified;Cluster_319-6A21_unclassified;.12
897	Nitrospirae;Nitrospira;Nitrospirales;Cluster_319-6A21;Cluster_319-6A21_unclassified;Cluster_319-6A21_unclassified;Cluster_319-6A21_unclassified;.13
898	Nitrospirae;Nitrospira;Nitrospirales;Cluster_319-6A21;Cluster_319-6A21_unclassified;Cluster_319-6A21_unclassified;Cluster_319-6A21_unclassified;.17
899	Nitrospirae;Nitrospira;Nitrospirales;Cluster_319-6A21;Cluster_319-6A21_unclassified;Cluster_319-6A21_unclassified;Cluster_319-6A21_unclassified;.2
900	Nitrospirae;Nitrospira;Nitrospirales;Cluster_319-6A21;Cluster_319-6A21_unclassified;Cluster_319-6A21_unclassified;Cluster_319-6A21_unclassified;.3
901	Nitrospirae;Nitrospira;Nitrospirales;Cluster_319-6A21;Cluster_319-6A21_unclassified;Cluster_319-6A21_unclassified;Cluster_319-6A21_unclassified;.4
902	Nitrospirae;Nitrospira;Nitrospirales;Cluster_319-6A21;Cluster_319-6A21_unclassified;Cluster_319-6A21_unclassified;Cluster_319-6A21_unclassified;.5
903	Nitrospirae;Nitrospira;Nitrospirales;Cluster_319-6A21;Cluster_319-6A21_unclassified;Cluster_319-6A21_unclassified;Cluster_319-6A21_unclassified;.6
904	Nitrospirae;Nitrospira;Nitrospirales;Cluster_319-6A21;Cluster_319-6A21_unclassified;Cluster_319-6A21_unclassified;Cluster_319-6A21_unclassified;.7
905	Nitrospirae;Nitrospira;Nitrospirales;Cluster_319-6A21;Cluster_319-6A21_unclassified;Cluster_319-6A21_unclassified;Cluster_319-6A21_unclassified;.8
906	Nitrospirae;Nitrospira;Nitrospirales;Cluster_319-6A21;Cluster_319-6A21_unclassified;Cluster_319-6A21_unclassified;Cluster_319-6A21_unclassified;.9
907	Nitrospirae;Nitrospira;Nitrospirales;Cluster_4-29;Cluster_4-29_unclassified;Cluster_4-29_unclassified;Cluster_4-29_unclassified;
908	Nitrospirae;Nitrospira;Nitrospirales;Cluster_4-29;Cluster_4-29_unclassified;Cluster_4-29_unclassified;Cluster_4-29_unclassified;.2
909	Nitrospirae;Nitrospira;Nitrospirales;Nitrospiraceae;Nitrospira;Nitrospira_unclassified;Nitrospira_unclassified;
910	Nitrospirae;Nitrospira;Nitrospirales;Nitrospiraceae;Nitrospira;Nitrospira_unclassified;Nitrospira_unclassified;.1
911	Nitrospirae;Nitrospira;Nitrospirales;Nitrospiraceae;Nitrospira;Nitrospira_unclassified;Nitrospira_unclassified;.2
912	Nitrospirae;Nitrospira;Nitrospirales;Nitrospiraceae;Nitrospira;Nitrospira_unclassified;Nitrospira_unclassified;.3
913	Nitrospirae;Nitrospira;Nitrospirales;Nitrospiraceae;Nitrospira;Nitrospira_unclassified;Nitrospira_unclassified;.4
914	Nitrospirae;Nitrospira;Nitrospirales;Nitrospiraceae;Nitrospira;Nitrospira_unclassified;Nitrospira_unclassified;.5
915	NPL-UPA2;NPL-UPA2_unclassified;NPL-UPA2_unclassified;NPL-UPA2_unclassified;NPL-UPA2_unclassified;NPL-UPA2_unclassified;NPL-UPA2_unclassified;
916	NPL-UPA2;NPL-UPA2_unclassified;NPL-UPA2_unclassified;NPL-UPA2_unclassified;NPL-UPA2_unclassified;NPL-UPA2_unclassified;NPL-UPA2_unclassified;.1
917	NPL-UPA2;NPL-UPA2_unclassified;NPL-UPA2_unclassified;NPL-UPA2_unclassified;NPL-UPA2_unclassified;NPL-UPA2_unclassified;NPL-UPA2_unclassified;.2
918	NPL-UPA2;NPL-UPA2_unclassified;NPL-UPA2_unclassified;NPL-UPA2_unclassified;NPL-UPA2_unclassified;NPL-UPA2_unclassified;NPL-UPA2_unclassified;.3
919	NPL-UPA2;NPL-UPA2_unclassified;NPL-UPA2_unclassified;NPL-UPA2_unclassified;NPL-UPA2_unclassified;NPL-UPA2_unclassified;NPL-UPA2_unclassified;.4
920	NPL-UPA2;NPL-UPA2_unclassified;NPL-UPA2_unclassified;NPL-UPA2_unclassified;NPL-UPA2_unclassified;NPL-UPA2_unclassified;NPL-UPA2_unclassified;.5
921	NPL-UPA2;NPL-UPA2_unclassified;NPL-UPA2_unclassified;NPL-UPA2_unclassified;NPL-UPA2_unclassified;NPL-UPA2_unclassified;NPL-UPA2_unclassified;.6
922	NPL-UPA2;NPL-UPA2_unclassified;NPL-UPA2_unclassified;NPL-UPA2_unclassified;NPL-UPA2_unclassified;NPL-UPA2_unclassified;NPL-UPA2_unclassified;.8
923	Planctomycetes;BD7-11;BD7-11_unclassified;BD7-11_unclassified;BD7-11_unclassified;BD7-11_unclassified;BD7-11_unclassified;
924	Planctomycetes;OM190;OM190_unclassified;OM190_unclassified;OM190_unclassified;OM190_unclassified;OM190_unclassified;
925	Planctomycetes;OM190;OM190_unclassified;OM190_unclassified;OM190_unclassified;OM190_unclassified;OM190_unclassified;.1
926	Planctomycetes;OM190;OM190_unclassified;OM190_unclassified;OM190_unclassified;OM190_unclassified;OM190_unclassified;.10
927	Planctomycetes;OM190;OM190_unclassified;OM190_unclassified;OM190_unclassified;OM190_unclassified;OM190_unclassified;.14
928	Planctomycetes;OM190;OM190_unclassified;OM190_unclassified;OM190_unclassified;OM190_unclassified;OM190_unclassified;.2
929	Planctomycetes;OM190;OM190_unclassified;OM190_unclassified;OM190_unclassified;OM190_unclassified;OM190_unclassified;.3
930	Planctomycetes;OM190;OM190_unclassified;OM190_unclassified;OM190_unclassified;OM190_unclassified;OM190_unclassified;.4
931	Planctomycetes;OM190;OM190_unclassified;OM190_unclassified;OM190_unclassified;OM190_unclassified;OM190_unclassified;.5
932	Planctomycetes;OM190;OM190_unclassified;OM190_unclassified;OM190_unclassified;OM190_unclassified;OM190_unclassified;.8
933	Planctomycetes;Phycisphaerae;CCM11a;CCM11a_unclassified;CCM11a_unclassified;CCM11a_unclassified;CCM11a_unclassified;
934	Planctomycetes;Phycisphaerae;CPla-3_termite_group;CPla-3_termite_group_unclassified;CPla-3_termite_group_unclassified;CPla-3_termite_group_unclassified;CPla-3_termite_group_unclassified;.1
935	Planctomycetes;Phycisphaerae;CPla-3_termite_group;CPla-3_termite_group_unclassified;CPla-3_termite_group_unclassified;CPla-3_termite_group_unclassified;CPla-3_termite_group_unclassified;.6
936	Planctomycetes;Phycisphaerae;mle1_8;mle1_8_unclassified;mle1_8_unclassified;mle1_8_unclassified;mle1_8_unclassified;.1
937	Planctomycetes;Phycisphaerae;Phycisphaerales;Phycisphaeraceae;AKYG587;AKYG587_unclassified;AKYG587_unclassified;
938	Planctomycetes;Phycisphaerae;Phycisphaerales;Phycisphaeraceae;AKYG587;AKYG587_unclassified;AKYG587_unclassified;.1
939	Planctomycetes;Phycisphaerae;Phycisphaerales;Phycisphaeraceae;AKYG587;AKYG587_unclassified;AKYG587_unclassified;.4
940	Planctomycetes;Phycisphaerae;Phycisphaerales;Phycisphaeraceae;AKYG587;AKYG587_unclassified;AKYG587_unclassified;.5
941	Planctomycetes;Phycisphaerae;Phycisphaerales;Phycisphaeraceae;AKYG587;AKYG587_unclassified;AKYG587_unclassified;.6
942	Planctomycetes;Phycisphaerae;Phycisphaerales;Phycisphaeraceae;AKYG587;AKYG587_unclassified;AKYG587_unclassified;.7
943	Planctomycetes;Phycisphaerae;Phycisphaerales;Phycisphaeraceae;Phycisphaeraceae_unclassified;Phycisphaeraceae_unclassified;Phycisphaeraceae_unclassified;.1
944	Planctomycetes;Phycisphaerae;Phycisphaerales;Phycisphaeraceae;Phycisphaeraceae_unclassified;Phycisphaeraceae_unclassified;Phycisphaeraceae_unclassified;.2
945	Planctomycetes;Phycisphaerae;Phycisphaerales;Phycisphaeraceae;SM1A02;SM1A02_unclassified;SM1A02_unclassified;
946	Planctomycetes;Phycisphaerae;Phycisphaerales;Phycisphaeraceae;SM1A02;SM1A02_unclassified;SM1A02_unclassified;.3
947	Planctomycetes;Phycisphaerae;Phycisphaerales;Phycisphaeraceae;SM1A02;SM1A02_unclassified;SM1A02_unclassified;.4
948	Planctomycetes;Phycisphaerae;Phycisphaerales;Phycisphaeraceae;SM1A02;SM1A02_unclassified;SM1A02_unclassified;.6
949	Planctomycetes;Phycisphaerae;Phycisphaerales;Phycisphaeraceae;SM1A02;SM1A02_unclassified;SM1A02_unclassified;
950	Planctomycetes;Phycisphaerae;Pla1_lineage;Pla1_lineage_unclassified;Pla1_lineage_unclassified;Pla1_lineage_unclassified;Pla1_lineage_unclassified;
951	Planctomycetes;Phycisphaerae;Pla1_lineage;Pla1_lineage_unclassified;Pla1_lineage_unclassified;Pla1_lineage_unclassified;Pla1_lineage_unclassified;.4
952	Planctomycetes;Phycisphaerae;Pla1_lineage;Pla1_lineage_unclassified;Pla1_lineage_unclassified;Pla1_lineage_unclassified;Pla1_lineage_unclassified;.5
953	Planctomycetes;Phycisphaerae;Pla1_lineage;Pla1_lineage_unclassified;Pla1_lineage_unclassified;Pla1_lineage_unclassified;Pla1_lineage_unclassified;.6
954	Planctomycetes;Phycisphaerae;S-70;S-70_unclassified;S-70_unclassified;S-70_unclassified;S-70_unclassified;
955	Planctomycetes;Phycisphaerae;S-70;S-70_unclassified;S-70_unclassified;S-70_unclassified;S-70_unclassified;.2
956	Planctomycetes;Phycisphaerae;WD2101_soil_group;WD2101_soil_group_unclassified;WD2101_soil_group_unclassified;WD2101_soil_group_unclassified;WD2101_soil_group_unclassified;
957	Planctomycetes;Phycisphaerae;WD2101_soil_group;WD2101_soil_group_unclassified;WD2101_soil_group_unclassified;WD2101_soil_group_unclassified;WD2101_soil_group_unclassified;.1
958	Planctomycetes;Phycisphaerae;WD2101_soil_group;WD2101_soil_group_unclassified;WD2101_soil_group_unclassified;WD2101_soil_group_unclassified;WD2101_soil_group_unclassified;.19
959	Planctomycetes;Phycisphaerae;WD2101_soil_group;WD2101_soil_group_unclassified;WD2101_soil_group_unclassified;WD2101_soil_group_unclassified;WD2101_soil_group_unclassified;.2
960	Planctomycetes;Phycisphaerae;WD2101_soil_group;WD2101_soil_group_unclassified;WD2101_soil_group_unclassified;WD2101_soil_group_unclassified;WD2101_soil_group_unclassified;.21
961	Planctomycetes;Phycisphaerae;WD2101_soil_group;WD2101_soil_group_unclassified;WD2101_soil_group_unclassified;WD2101_soil_group_unclassified;WD2101_soil_group_unclassified;.24
962	Planctomycetes;Phycisphaerae;WD2101_soil_group;WD2101_soil_group_unclassified;WD2101_soil_group_unclassified;WD2101_soil_group_unclassified;WD2101_soil_group_unclassified;.35
963	Planctomycetes;Phycisphaerae;WD2101_soil_group;WD2101_soil_group_unclassified;WD2101_soil_group_unclassified;WD2101_soil_group_unclassified;WD2101_soil_group_unclassified;.4
964	Planctomycetes;Phycisphaerae;WD2101_soil_group;WD2101_soil_group_unclassified;WD2101_soil_group_unclassified;WD2101_soil_group_unclassified;WD2101_soil_group_unclassified;.5
965	Planctomycetes;Phycisphaerae;WD2101_soil_group;WD2101_soil_group_unclassified;WD2101_soil_group_unclassified;WD2101_soil_group_unclassified;WD2101_soil_group_unclassified;.8
966	Planctomycetes;Phycisphaerae;WD2101_soil_group;WD2101_soil_group_unclassified;WD2101_soil_group_unclassified;WD2101_soil_group_unclassified;WD2101_soil_group_unclassified;.9
967	Planctomycetes;Pla3_lineage;Pla3_lineage_unclassified;Pla3_lineage_unclassified;Pla3_lineage_unclassified;Pla3_lineage_unclassified;Pla3_lineage_unclassified;
968	Planctomycetes;Pla3_lineage;Pla3_lineage_unclassified;Pla3_lineage_unclassified;Pla3_lineage_unclassified;Pla3_lineage_unclassified;Pla3_lineage_unclassified;.1
969	Planctomycetes;Pla3_lineage;Pla3_lineage_unclassified;Pla3_lineage_unclassified;Pla3_lineage_unclassified;Pla3_lineage_unclassified;Pla3_lineage_unclassified;.3
970	Planctomycetes;Pla4_lineage;Pla4_lineage_unclassified;Pla4_lineage_unclassified;Pla4_lineage_unclassified;Pla4_lineage_unclassified;Pla4_lineage_unclassified;
971	Planctomycetes;Pla4_lineage;Pla4_lineage_unclassified;Pla4_lineage_unclassified;Pla4_lineage_unclassified;Pla4_lineage_unclassified;Pla4_lineage_unclassified;.1
972	Planctomycetes;Pla4_lineage;Pla4_lineage_unclassified;Pla4_lineage_unclassified;Pla4_lineage_unclassified;Pla4_lineage_unclassified;Pla4_lineage_unclassified;.2
973	Planctomycetes;Pla4_lineage;Pla4_lineage_unclassified;Pla4_lineage_unclassified;Pla4_lineage_unclassified;Pla4_lineage_unclassified;Pla4_lineage_unclassified;.3
974	Planctomycetes;Pla4_lineage;Pla4_lineage_unclassified;Pla4_lineage_unclassified;Pla4_lineage_unclassified;Pla4_lineage_unclassified;Pla4_lineage_unclassified;.6
975	Planctomycetes;Pla4_lineage;Pla4_lineage_unclassified;Pla4_lineage_unclassified;Pla4_lineage_unclassified;Pla4_lineage_unclassified;Pla4_lineage_unclassified;.7
976	Planctomycetes;Planctomycetacia;Planctomycetales;Planctomycetaceae;Gemmata;Gemmata_unclassified;Gemmata_unclassified;.1
977	Planctomycetes;Planctomycetacia;Planctomycetales;Planctomycetaceae;Gemmata;Gemmata_unclassified;Gemmata_unclassified;.10
978	Planctomycetes;Planctomycetacia;Planctomycetales;Planctomycetaceae;Gemmata;Gemmata_unclassified;Gemmata_unclassified;.5
979	Planctomycetes;Planctomycetacia;Planctomycetales;Planctomycetaceae;Gemmata;Gemmata_unclassified;Gemmata_unclassified;
980	Planctomycetes;Planctomycetacia;Planctomycetales;Planctomycetaceae;Gemmata;Gemmata_unclassified;Gemmata_unclassified;.1
981	Planctomycetes;Planctomycetacia;Planctomycetales;Planctomycetaceae;Isosphaera;Isosphaera_unclassified;Isosphaera_unclassified;
982	Planctomycetes;Planctomycetacia;Planctomycetales;Planctomycetaceae;Isosphaera;Isosphaera_unclassified;Isosphaera_unclassified;.1
983	Planctomycetes;Planctomycetacia;Planctomycetales;Planctomycetaceae;Pir4_lineage;Pir4_lineage_unclassified;Pir4_lineage_unclassified;
984	Planctomycetes;Planctomycetacia;Planctomycetales;Planctomycetaceae;Pir4_lineage;Pir4_lineage_unclassified;Pir4_lineage_unclassified;.1
985	Planctomycetes;Planctomycetacia;Planctomycetales;Planctomycetaceae;Pir4_lineage;Pir4_lineage_unclassified;Pir4_lineage_unclassified;.3
986	Planctomycetes;Planctomycetacia;Planctomycetales;Planctomycetaceae;Pirellula;Pirellula_unclassified;Pirellula_unclassified;
987	Planctomycetes;Planctomycetacia;Planctomycetales;Planctomycetaceae;Pirellula;Pirellula_unclassified;Pirellula_unclassified;.1
988	Planctomycetes;Planctomycetacia;Planctomycetales;Planctomycetaceae;Pirellula;Pirellula_unclassified;Pirellula_unclassified;.2
989	Planctomycetes;Planctomycetacia;Planctomycetales;Planctomycetaceae;Pirellula;Pirellula_unclassified;Pirellula_unclassified;.3
990	Planctomycetes;Planctomycetacia;Planctomycetales;Planctomycetaceae;Pirellula;Pirellula_unclassified;Pirellula_unclassified;.5
991	Planctomycetes;Planctomycetacia;Planctomycetales;Planctomycetaceae;Planctomyces_1;Planctomyces_1_unclassified;Planctomyces_1_unclassified;
992	Planctomycetes;Planctomycetacia;Planctomycetales;Planctomycetaceae;Planctomyces_1;Planctomyces_1_unclassified;Planctomyces_1_unclassified;.1
993	Planctomycetes;Planctomycetacia;Planctomycetales;Planctomycetaceae;Planctomyces_1;Planctomyces_1_unclassified;Planctomyces_1_unclassified;.11
994	Planctomycetes;Planctomycetacia;Planctomycetales;Planctomycetaceae;Planctomyces_1;Planctomyces_1_unclassified;Planctomyces_1_unclassified;.13
995	Planctomycetes;Planctomycetacia;Planctomycetales;Planctomycetaceae;Planctomyces_1;Planctomyces_1_unclassified;Planctomyces_1_unclassified;.16
996	Planctomycetes;Planctomycetacia;Planctomycetales;Planctomycetaceae;Planctomyces_1;Planctomyces_1_unclassified;Planctomyces_1_unclassified;.2
997	Planctomycetes;Planctomycetacia;Planctomycetales;Planctomycetaceae;Planctomyces_1;Planctomyces_1_unclassified;Planctomyces_1_unclassified;.5
998	Planctomycetes;Planctomycetacia;Planctomycetales;Planctomycetaceae;Planctomyces_1;Planctomyces_1_unclassified;Planctomyces_1_unclassified;.7
999	Planctomycetes;Planctomycetacia;Planctomycetales;Planctomycetaceae;Planctomycetaceae_unclassified;Planctomycetaceae_unclassified;Planctomycetaceae_unclassified;.10
1000	Planctomycetes;Planctomycetacia;Planctomycetales;Planctomycetaceae;Planctomycetaceae_unclassified;Planctomycetaceae_unclassified;Planctomycetaceae_unclassified;.159
1001	Planctomycetes;Planctomycetacia;Planctomycetales;Planctomycetaceae;Planctomycetaceae_unclassified;Planctomycetaceae_unclassified;Planctomycetaceae_unclassified;.16
1002	Planctomycetes;Planctomycetacia;Planctomycetales;Planctomycetaceae;Planctomycetaceae_unclassified;Planctomycetaceae_unclassified;Planctomycetaceae_unclassified;.18
1003	Planctomycetes;Planctomycetacia;Planctomycetales;Planctomycetaceae;Planctomycetaceae_unclassified;Planctomycetaceae_unclassified;Planctomycetaceae_unclassified;.182
1004	Planctomycetes;Planctomycetacia;Planctomycetales;Planctomycetaceae;Planctomycetaceae_unclassified;Planctomycetaceae_unclassified;Planctomycetaceae_unclassified;.25
1005	Planctomycetes;Planctomycetacia;Planctomycetales;Planctomycetaceae;Planctomycetaceae_unclassified;Planctomycetaceae_unclassified;Planctomycetaceae_unclassified;.33
1006	Planctomycetes;Planctomycetacia;Planctomycetales;Planctomycetaceae;Planctomycetaceae_unclassified;Planctomycetaceae_unclassified;Planctomycetaceae_unclassified;.34
1007	Planctomycetes;Planctomycetacia;Planctomycetales;Planctomycetaceae;Planctomycetaceae_unclassified;Planctomycetaceae_unclassified;Planctomycetaceae_unclassified;.38
1008	Planctomycetes;Planctomycetacia;Planctomycetales;Planctomycetaceae;Planctomycetaceae_unclassified;Planctomycetaceae_unclassified;Planctomycetaceae_unclassified;.45
1009	Planctomycetes;Planctomycetacia;Planctomycetales;Planctomycetaceae;Planctomycetaceae_unclassified;Planctomycetaceae_unclassified;Planctomycetaceae_unclassified;.5
1010	Planctomycetes;Planctomycetacia;Planctomycetales;Planctomycetaceae;Planctomycetaceae_unclassified;Planctomycetaceae_unclassified;Planctomycetaceae_unclassified;.51
1011	Planctomycetes;Planctomycetacia;Planctomycetales;Planctomycetaceae;Planctomycetaceae_unclassified;Planctomycetaceae_unclassified;Planctomycetaceae_unclassified;.6
1012	Planctomycetes;Planctomycetacia;Planctomycetales;Planctomycetaceae;Planctomycetaceae_unclassified;Planctomycetaceae_unclassified;Planctomycetaceae_unclassified;.7
1013	Planctomycetes;Planctomycetacia;Planctomycetales;Planctomycetaceae;Planctomycetaceae_unclassified;Planctomycetaceae_unclassified;Planctomycetaceae_unclassified;.8
1014	Planctomycetes;Planctomycetacia;Planctomycetales;Planctomycetaceae;Planctomycetaceae_unclassified;Planctomycetaceae_unclassified;Planctomycetaceae_unclassified;
1015	Planctomycetes;Planctomycetacia;Planctomycetales;Planctomycetaceae;Planctomycetaceae_unclassified;Planctomycetaceae_unclassified;Planctomycetaceae_unclassified;
1016	Planctomycetes;Planctomycetacia;Planctomycetales;Planctomycetaceae;Planctomycetaceae_unclassified;Planctomycetaceae_unclassified;Planctomycetaceae_unclassified;.1
1017	Planctomycetes;Planctomycetacia;Planctomycetales;Planctomycetaceae;Planctomycetaceae_unclassified;Planctomycetaceae_unclassified;Planctomycetaceae_unclassified;
1018	Planctomycetes;Planctomycetacia;Planctomycetales;Planctomycetaceae;Planctomycetaceae_unclassified;Planctomycetaceae_unclassified;Planctomycetaceae_unclassified;
1019	Planctomycetes;Planctomycetacia;Planctomycetales;Planctomycetaceae;Planctomycetaceae_unclassified;Planctomycetaceae_unclassified;Planctomycetaceae_unclassified;.1
1020	Planctomycetes;Planctomycetacia;Planctomycetales;Planctomycetaceae;Planctomycetaceae_unclassified;Planctomycetaceae_unclassified;Planctomycetaceae_unclassified;
1021	Planctomycetes;Planctomycetacia;Planctomycetales;Planctomycetaceae;Planctomycetaceae_unclassified;Planctomycetaceae_unclassified;Planctomycetaceae_unclassified;.1
1022	Planctomycetes;Planctomycetacia;Planctomycetales;Planctomycetaceae;Schlesneria;Schlesneria_unclassified;Schlesneria_unclassified;
1023	Planctomycetes;Planctomycetacia;Planctomycetales;Planctomycetaceae;Termite_cockroach_cluster_1;Termite_cockroach_cluster_1_unclassified;Termite_cockroach_cluster_1_unclassified;
1024	Planctomycetes;Planctomycetacia;Planctomycetales;Planctomycetaceae;Termite_cockroach_cluster_1;Termite_cockroach_cluster_1_unclassified;Termite_cockroach_cluster_1_unclassified;.1
1025	Planctomycetes;Planctomycetacia;Planctomycetales;Planctomycetaceae;Termite_cockroach_cluster_2;Termite_cockroach_cluster_2_unclassified;Termite_cockroach_cluster_2_unclassified;
1026	Planctomycetes;Planctomycetacia;Planctomycetales;Planctomycetaceae;Termite_cockroach_cluster_2;Termite_cockroach_cluster_2_unclassified;Termite_cockroach_cluster_2_unclassified;.1
1027	Planctomycetes;Planctomycetacia;Planctomycetales;Planctomycetaceae;Termite_cockroach_cluster_2;Termite_cockroach_cluster_2_unclassified;Termite_cockroach_cluster_2_unclassified;.17
1028	Planctomycetes;Planctomycetacia;Planctomycetales;Planctomycetaceae;Termite_cockroach_cluster_2;Termite_cockroach_cluster_2_unclassified;Termite_cockroach_cluster_2_unclassified;.2
1029	Planctomycetes;Planctomycetacia;Planctomycetales;Planctomycetaceae;Termite_cockroach_cluster_2;Termite_cockroach_cluster_2_unclassified;Termite_cockroach_cluster_2_unclassified;.4
1030	Planctomycetes;Planctomycetacia;Planctomycetales;Planctomycetaceae;Uncultured_16;Uncultured_16_unclassified;Uncultured_16_unclassified;
1031	Planctomycetes;Planctomycetacia;Planctomycetales;Planctomycetaceae;Uncultured_16;Uncultured_16_unclassified;Uncultured_16_unclassified;.2
1032	Planctomycetes;Planctomycetacia;Planctomycetales;Planctomycetaceae;Uncultured_17;Uncultured_17_unclassified;Uncultured_17_unclassified;
1033	Planctomycetes;Planctomycetacia;Planctomycetales;Planctomycetaceae;Uncultured_18;Uncultured_18_unclassified;Uncultured_18_unclassified;
1034	Planctomycetes;Planctomycetacia;Planctomycetales;Planctomycetaceae;Uncultured_18;Uncultured_18_unclassified;Uncultured_18_unclassified;.1
1035	Planctomycetes;Planctomycetacia;Planctomycetales;Planctomycetaceae;Uncultured_18;Uncultured_18_unclassified;Uncultured_18_unclassified;.2
1036	Planctomycetes;Planctomycetacia;Planctomycetales;Planctomycetaceae;Uncultured_18;Uncultured_18_unclassified;Uncultured_18_unclassified;.3
1037	Planctomycetes;Planctomycetacia;Planctomycetales;Planctomycetaceae;Uncultured_18;Uncultured_18_unclassified;Uncultured_18_unclassified;.4
1038	Planctomycetes;Planctomycetacia;Planctomycetales;Planctomycetaceae;Uncultured_18;Uncultured_18_unclassified;Uncultured_18_unclassified;.8
1039	Planctomycetes;Planctomycetacia;Planctomycetales;Planctomycetaceae;Uncultured_23;Uncultured_23_unclassified;Uncultured_23_unclassified;.2
1040	Planctomycetes;Planctomycetacia;Planctomycetales;Planctomycetaceae;Uncultured_24;Uncultured_24_unclassified;Uncultured_24_unclassified;
1041	Planctomycetes;Planctomycetacia;Planctomycetales;Planctomycetaceae;Uncultured_29;Uncultured_29_unclassified;Uncultured_29_unclassified;
1042	Planctomycetes;Planctomycetacia;Planctomycetales;Planctomycetaceae;Uncultured_31;Uncultured_31_unclassified;Uncultured_31_unclassified;
1043	Planctomycetes;Planctomycetacia;Planctomycetales;Planctomycetaceae;Uncultured_5;Uncultured_5_unclassified;Uncultured_5_unclassified;
1044	Planctomycetes;Planctomycetacia;Planctomycetales;Planctomycetaceae;Uncultured_5;Uncultured_5_unclassified;Uncultured_5_unclassified;.1
1045	Planctomycetes;Planctomycetacia;Planctomycetales;Planctomycetaceae;Uncultured_5;Uncultured_5_unclassified;Uncultured_5_unclassified;
1046	Planctomycetes;Planctomycetacia;Planctomycetales;Planctomycetaceae;Uncultured_5;Uncultured_5_unclassified;Uncultured_5_unclassified;
1047	Planctomycetes;Planctomycetacia;Planctomycetales;Planctomycetaceae;Uncultured_5;Uncultured_5_unclassified;Uncultured_5_unclassified;.1
1048	Planctomycetes;Planctomycetacia;Planctomycetales;Planctomycetaceae;Uncultured_5;Uncultured_5_unclassified;Uncultured_5_unclassified;
1049	Planctomycetes;Planctomycetacia;Planctomycetales;Planctomycetaceae;Uncultured_6;Uncultured_6_unclassified;Uncultured_6_unclassified;.1
1050	Planctomycetes;Planctomycetacia;Planctomycetales;Planctomycetaceae;Uncultured_6;Uncultured_6_unclassified;Uncultured_6_unclassified;.3
1051	Planctomycetes;Planctomycetacia;Planctomycetales;Planctomycetaceae;Uncultured_6;Uncultured_6_unclassified;Uncultured_6_unclassified;
1052	Planctomycetes;Planctomycetacia;Planctomycetales;Planctomycetaceae;Uncultured_7;Uncultured_7_unclassified;Uncultured_7_unclassified;
1053	Planctomycetes;Planctomycetes_unclassified;Planctomycetes_unclassified;Planctomycetes_unclassified;Planctomycetes_unclassified;Planctomycetes_unclassified;Planctomycetes_unclassified;.4
1054	Planctomycetes;vadinHA49;Insect_cluster;Insect_cluster_unclassified;Insect_cluster_unclassified;Insect_cluster_unclassified;Insect_cluster_unclassified;
1055	Planctomycetes;vadinHA49;Insect_cluster;Insect_cluster_unclassified;Insect_cluster_unclassified;Insect_cluster_unclassified;Insect_cluster_unclassified;.1
1056	Planctomycetes;vadinHA49;Insect_cluster;Insect_cluster_unclassified;Insect_cluster_unclassified;Insect_cluster_unclassified;Insect_cluster_unclassified;.15
1057	Planctomycetes;vadinHA49;Insect_cluster;Insect_cluster_unclassified;Insect_cluster_unclassified;Insect_cluster_unclassified;Insect_cluster_unclassified;.2
1058	Planctomycetes;vadinHA49;Insect_cluster;Insect_cluster_unclassified;Insect_cluster_unclassified;Insect_cluster_unclassified;Insect_cluster_unclassified;.3
1059	Planctomycetes;vadinHA49;Insect_cluster;Insect_cluster_unclassified;Insect_cluster_unclassified;Insect_cluster_unclassified;Insect_cluster_unclassified;.4
1060	Planctomycetes;vadinHA49;Insect_cluster;Insect_cluster_unclassified;Insect_cluster_unclassified;Insect_cluster_unclassified;Insect_cluster_unclassified;.5
1061	Planctomycetes;vadinHA49;Insect_cluster;Insect_cluster_unclassified;Insect_cluster_unclassified;Insect_cluster_unclassified;Insect_cluster_unclassified;.9
1062	Planctomycetes;vadinHA49;vadinHA49_unclassified;vadinHA49_unclassified;vadinHA49_unclassified;vadinHA49_unclassified;vadinHA49_unclassified;
1063	Planctomycetes;vadinHA49;vadinHA49_unclassified;vadinHA49_unclassified;vadinHA49_unclassified;vadinHA49_unclassified;vadinHA49_unclassified;.3
1064	Proteobacteria_1;Deltaproteobacteria;Desulfobacterales;Nitrospinaceae;Candidatus_Entotheonella;Candidatus_Entotheonella_unclassified;Candidatus_Entotheonella_unclassified;
1065	Proteobacteria_1;Deltaproteobacteria;Desulfobacterales;Nitrospinaceae;Candidatus_Entotheonella;Candidatus_Entotheonella_unclassified;Candidatus_Entotheonella_unclassified;.1
1066	Proteobacteria_1;Deltaproteobacteria;Desulfobacterales;Nitrospinaceae;Candidatus_Entotheonella;Candidatus_Entotheonella_unclassified;Candidatus_Entotheonella_unclassified;.2
1067	Proteobacteria_1;Deltaproteobacteria;Desulfobacterales;Nitrospinaceae;Candidatus_Entotheonella;Candidatus_Entotheonella_unclassified;Candidatus_Entotheonella_unclassified;.3
1068	Proteobacteria_1;Deltaproteobacteria;Desulfobacterales;Nitrospinaceae;Candidatus_Entotheonella;Candidatus_Entotheonella_unclassified;Candidatus_Entotheonella_unclassified;.5
1069	Proteobacteria;Alphaproteobacteria;Alphaproteobacteria_unclassified;Alphaproteobacteria_unclassified;Alphaproteobacteria_unclassified;Alphaproteobacteria_unclassified;Alphaproteobacteria_unclassified;.1
1070	Proteobacteria;Alphaproteobacteria;Alphaproteobacteria_unclassified;Alphaproteobacteria_unclassified;Alphaproteobacteria_unclassified;Alphaproteobacteria_unclassified;Alphaproteobacteria_unclassified;.103
1071	Proteobacteria;Alphaproteobacteria;Alphaproteobacteria_unclassified;Alphaproteobacteria_unclassified;Alphaproteobacteria_unclassified;Alphaproteobacteria_unclassified;Alphaproteobacteria_unclassified;.108
1072	Proteobacteria;Alphaproteobacteria;Alphaproteobacteria_unclassified;Alphaproteobacteria_unclassified;Alphaproteobacteria_unclassified;Alphaproteobacteria_unclassified;Alphaproteobacteria_unclassified;.111
1073	Proteobacteria;Alphaproteobacteria;Alphaproteobacteria_unclassified;Alphaproteobacteria_unclassified;Alphaproteobacteria_unclassified;Alphaproteobacteria_unclassified;Alphaproteobacteria_unclassified;.152
1074	Proteobacteria;Alphaproteobacteria;Alphaproteobacteria_unclassified;Alphaproteobacteria_unclassified;Alphaproteobacteria_unclassified;Alphaproteobacteria_unclassified;Alphaproteobacteria_unclassified;.163
1075	Proteobacteria;Alphaproteobacteria;Alphaproteobacteria_unclassified;Alphaproteobacteria_unclassified;Alphaproteobacteria_unclassified;Alphaproteobacteria_unclassified;Alphaproteobacteria_unclassified;.194
1076	Proteobacteria;Alphaproteobacteria;Alphaproteobacteria_unclassified;Alphaproteobacteria_unclassified;Alphaproteobacteria_unclassified;Alphaproteobacteria_unclassified;Alphaproteobacteria_unclassified;.233
1077	Proteobacteria;Alphaproteobacteria;Alphaproteobacteria_unclassified;Alphaproteobacteria_unclassified;Alphaproteobacteria_unclassified;Alphaproteobacteria_unclassified;Alphaproteobacteria_unclassified;.32
1078	Proteobacteria;Alphaproteobacteria;Alphaproteobacteria_unclassified;Alphaproteobacteria_unclassified;Alphaproteobacteria_unclassified;Alphaproteobacteria_unclassified;Alphaproteobacteria_unclassified;.41
1079	Proteobacteria;Alphaproteobacteria;Alphaproteobacteria_unclassified;Alphaproteobacteria_unclassified;Alphaproteobacteria_unclassified;Alphaproteobacteria_unclassified;Alphaproteobacteria_unclassified;.429
1080	Proteobacteria;Alphaproteobacteria;Alphaproteobacteria_unclassified;Alphaproteobacteria_unclassified;Alphaproteobacteria_unclassified;Alphaproteobacteria_unclassified;Alphaproteobacteria_unclassified;.43
1081	Proteobacteria;Alphaproteobacteria;Alphaproteobacteria_unclassified;Alphaproteobacteria_unclassified;Alphaproteobacteria_unclassified;Alphaproteobacteria_unclassified;Alphaproteobacteria_unclassified;.45
1082	Proteobacteria;Alphaproteobacteria;Alphaproteobacteria_unclassified;Alphaproteobacteria_unclassified;Alphaproteobacteria_unclassified;Alphaproteobacteria_unclassified;Alphaproteobacteria_unclassified;.46
1083	Proteobacteria;Alphaproteobacteria;Alphaproteobacteria_unclassified;Alphaproteobacteria_unclassified;Alphaproteobacteria_unclassified;Alphaproteobacteria_unclassified;Alphaproteobacteria_unclassified;.58
1084	Proteobacteria;Alphaproteobacteria;Alphaproteobacteria_unclassified;Alphaproteobacteria_unclassified;Alphaproteobacteria_unclassified;Alphaproteobacteria_unclassified;Alphaproteobacteria_unclassified;.61
1085	Proteobacteria;Alphaproteobacteria;Alphaproteobacteria_unclassified;Alphaproteobacteria_unclassified;Alphaproteobacteria_unclassified;Alphaproteobacteria_unclassified;Alphaproteobacteria_unclassified;.80
1086	Proteobacteria;Alphaproteobacteria;Alphaproteobacteria_unclassified;Alphaproteobacteria_unclassified;Alphaproteobacteria_unclassified;Alphaproteobacteria_unclassified;Alphaproteobacteria_unclassified;.85
1087	Proteobacteria;Alphaproteobacteria;Alphaproteobacteria_unclassified;Alphaproteobacteria_unclassified;Alphaproteobacteria_unclassified;Alphaproteobacteria_unclassified;Alphaproteobacteria_unclassified;.97
1088	Proteobacteria;Alphaproteobacteria;Caulobacterales;Caulobacteraceae;Brevundimonas;Brevundimonas_unclassified;Brevundimonas_unclassified;
1089	Proteobacteria;Alphaproteobacteria;Caulobacterales;Caulobacteraceae;Caulobacteraceae_unclassified;Caulobacteraceae_unclassified;Caulobacteraceae_unclassified;.2
1090	Proteobacteria;Alphaproteobacteria;Caulobacterales;Caulobacteraceae;Phenylobacterium;Phenylobacterium_unclassified;Phenylobacterium_unclassified;
1091	Proteobacteria;Alphaproteobacteria;Caulobacterales;Caulobacteraceae;Phenylobacterium;Phenylobacterium_unclassified;Phenylobacterium_unclassified;
1092	Proteobacteria;Alphaproteobacteria;Caulobacterales;Hyphomonadaceae;Hirschia;Hirschia_unclassified;Hirschia_unclassified;
1093	Proteobacteria;Alphaproteobacteria;Caulobacterales;Hyphomonadaceae;Uncultured_2;Uncultured_2_unclassified;Uncultured_2_unclassified;
1094	Proteobacteria;Alphaproteobacteria;Caulobacterales;Hyphomonadaceae;Uncultured_2;Uncultured_2_unclassified;Uncultured_2_unclassified;.7
1095	Proteobacteria;Alphaproteobacteria;Rhizobiales_1;Brucellaceae;Pseudochrobactrum;Pseudochrobactrum_unclassified;Pseudochrobactrum_unclassified;
1096	Proteobacteria;Alphaproteobacteria;Rhizobiales_1;Hyphomicrobiaceae;Devosia-Prosthecomicrobium;Devosia-Prosthecomicrobium_unclassified;Devosia-Prosthecomicrobium_unclassified;
1097	Proteobacteria;Alphaproteobacteria;Rhizobiales_1;Hyphomicrobiaceae;Hyphomicrobiaceae_unclassified;Hyphomicrobiaceae_unclassified;Hyphomicrobiaceae_unclassified;
1098	Proteobacteria;Alphaproteobacteria;Rhizobiales_1;Phyllobacteriaceae;Defluvibacter;Defluvibacter_unclassified;Defluvibacter_unclassified;
1099	Proteobacteria;Alphaproteobacteria;Rhizobiales_1;Phyllobacteriaceae;Phyllobacteriaceae_unclassified;Phyllobacteriaceae_unclassified;Phyllobacteriaceae_unclassified;
1100	Proteobacteria;Alphaproteobacteria;Rhizobiales_1;Rhizobiaceae;Rhizobium-Agrobacterium;Rhizobium-Agrobacterium_unclassified;Rhizobium-Agrobacterium_unclassified;
1101	Proteobacteria;Alphaproteobacteria;Rhizobiales_1;Rhizobiaceae;Rhizobium-Agrobacterium;Rhizobium-Agrobacterium_unclassified;Rhizobium-Agrobacterium_unclassified;.1
1102	Proteobacteria;Alphaproteobacteria;Rhizobiales_1;Rhizobiales_1_unclassified;Rhizobiales_1_unclassified;Rhizobiales_1_unclassified;Rhizobiales_1_unclassified;.1
1103	Proteobacteria;Alphaproteobacteria;Rhizobiales_2;alphaI_cluster_1;alphaI_cluster_1_unclassified;alphaI_cluster_1_unclassified;alphaI_cluster_1_unclassified;
1104	Proteobacteria;Alphaproteobacteria;Rhizobiales_2;Bradyrhizobiaceae;Bradyrhizobium_12;Bradyrhizobium_12_unclassified;Bradyrhizobium_12_unclassified;
1105	Proteobacteria;Alphaproteobacteria;Rhizobiales_2;Hyphomicrobiaceae;Rhodomicrobium;Rhodomicrobium_unclassified;Rhodomicrobium_unclassified;
1106	Proteobacteria;Alphaproteobacteria;Rhizobiales_2;Hyphomicrobiaceae;Rhodoplanes;Rhodoplanes_unclassified;Rhodoplanes_unclassified;
1107	Proteobacteria;Alphaproteobacteria;Rhizobiales_2;Methylobacteriaceae;Methylobacteriaceae_unclassified;Methylobacteriaceae_unclassified;Methylobacteriaceae_unclassified;
1108	Proteobacteria;Alphaproteobacteria;Rhizobiales_2;Rhizobiales_2_unclassified;Rhizobiales_2_unclassified;Rhizobiales_2_unclassified;Rhizobiales_2_unclassified;
1109	Proteobacteria;Alphaproteobacteria;Rhizobiales_2;Rhizobiales_2_unclassified;Rhizobiales_2_unclassified;Rhizobiales_2_unclassified;Rhizobiales_2_unclassified;.16
1110	Proteobacteria;Alphaproteobacteria;Rhizobiales_2;Rhizobiales_2_unclassified;Rhizobiales_2_unclassified;Rhizobiales_2_unclassified;Rhizobiales_2_unclassified;.2
1111	Proteobacteria;Alphaproteobacteria;Rhizobiales_2;Rhizobiales_2_unclassified;Rhizobiales_2_unclassified;Rhizobiales_2_unclassified;Rhizobiales_2_unclassified;.3
1112	Proteobacteria;Alphaproteobacteria;Rhizobiales_2;Rhizobiales_2_unclassified;Rhizobiales_2_unclassified;Rhizobiales_2_unclassified;Rhizobiales_2_unclassified;
1113	Proteobacteria;Alphaproteobacteria;Rhizobiales_2;Rhizobiales_2_unclassified;Rhizobiales_2_unclassified;Rhizobiales_2_unclassified;Rhizobiales_2_unclassified;
1114	Proteobacteria;Alphaproteobacteria;Rhizobiales_2;Rhizobiales_2_unclassified;Rhizobiales_2_unclassified;Rhizobiales_2_unclassified;Rhizobiales_2_unclassified;
1115	Proteobacteria;Alphaproteobacteria;Rhizobiales_2;Rhizobiales_2_unclassified;Rhizobiales_2_unclassified;Rhizobiales_2_unclassified;Rhizobiales_2_unclassified;.1
1116	Proteobacteria;Alphaproteobacteria;Rhizobiales_2;Rhizobiales_2_unclassified;Rhizobiales_2_unclassified;Rhizobiales_2_unclassified;Rhizobiales_2_unclassified;
1117	Proteobacteria;Alphaproteobacteria;Rhizobiales_2;Rhizobiales_2_unclassified;Rhizobiales_2_unclassified;Rhizobiales_2_unclassified;Rhizobiales_2_unclassified;
1118	Proteobacteria;Alphaproteobacteria;Rhizobiales_2;Rhizobiales_2_unclassified;Rhizobiales_2_unclassified;Rhizobiales_2_unclassified;Rhizobiales_2_unclassified;.1
1119	Proteobacteria;Alphaproteobacteria;Rhizobiales_2;Rhizobiales_2_unclassified;Rhizobiales_2_unclassified;Rhizobiales_2_unclassified;Rhizobiales_2_unclassified;.3
1120	Proteobacteria;Alphaproteobacteria;Rhizobiales_2;Xanthobacteraceae;Labrys;Labrys_unclassified;Labrys_unclassified;
1121	Proteobacteria;Alphaproteobacteria;Rhizobiales_2;Xanthobacteraceae;Uncultured_1;Uncultured_1_unclassified;Uncultured_1_unclassified;
1122	Proteobacteria;Alphaproteobacteria;Rhizobiales_2;Xanthobacteraceae;Xanthobacteraceae_unclassified;Xanthobacteraceae_unclassified;Xanthobacteraceae_unclassified;
1123	Proteobacteria;Alphaproteobacteria;Rhizobiales_2;Xanthobacteraceae;Xanthobacteraceae_unclassified;Xanthobacteraceae_unclassified;Xanthobacteraceae_unclassified;
1124	Proteobacteria;Alphaproteobacteria;Rhizobiales_2;Xanthobacteraceae;Xanthobacteraceae_unclassified;Xanthobacteraceae_unclassified;Xanthobacteraceae_unclassified;
1125	Proteobacteria;Alphaproteobacteria;Rhizobiales_3;Hyphomicrobiaceae;Hyphomicrobiaceae_unclassified;Hyphomicrobiaceae_unclassified;Hyphomicrobiaceae_unclassified;
1126	Proteobacteria;Alphaproteobacteria;Rhizobiales_3;Hyphomicrobiaceae;Hyphomicrobium_1;Hyphomicrobium_1_unclassified;Hyphomicrobium_1_unclassified;
1127	Proteobacteria;Alphaproteobacteria;Rhizobiales_3;Hyphomicrobiaceae;Hyphomicrobium_2;Hyphomicrobium_2_unclassified;Hyphomicrobium_2_unclassified;
1128	Proteobacteria;Alphaproteobacteria;Rhizobiales_3;Hyphomicrobiaceae;Pedomicrobium;Pedomicrobium_unclassified;Pedomicrobium_unclassified;
1129	Proteobacteria;Alphaproteobacteria;Rhizobiales_3;Hyphomicrobiaceae;Pedomicrobium;Pedomicrobium_unclassified;Pedomicrobium_unclassified;.1
1130	Proteobacteria;Alphaproteobacteria;Rhizobiales;Hypomicrobiaceae;Prosthecomicrobium;Prosthecomicrobium_unclassified;Prosthecomicrobium_unclassified;
1131	Proteobacteria;Alphaproteobacteria;Rhizobiales;Hypomicrobiaceae;Prosthecomicrobium;Prosthecomicrobium_unclassified;Prosthecomicrobium_unclassified;.2
1132	Proteobacteria;Alphaproteobacteria;Rhizobiales;Methylocystaceae;Uncultured_1;Uncultured_1_unclassified;Uncultured_1_unclassified;
1133	Proteobacteria;Alphaproteobacteria;Rhizobiales;Methylocystaceae;Uncultured_1;Uncultured_1_unclassified;Uncultured_1_unclassified;.1
1134	Proteobacteria;Alphaproteobacteria;Rhizobiales;Methylocystaceae;Uncultured_1;Uncultured_1_unclassified;Uncultured_1_unclassified;.2
1135	Proteobacteria;Alphaproteobacteria;Rhizobiales;Methylocystaceae;Uncultured_1;Uncultured_1_unclassified;Uncultured_1_unclassified;.3
1136	Proteobacteria;Alphaproteobacteria;Rhizobiales;Methylocystaceae;Uncultured_1;Uncultured_1_unclassified;Uncultured_1_unclassified;.4
1137	Proteobacteria;Alphaproteobacteria;Rhizobiales;Rhodobiaceae;Rhodobium_2;Rhodobium_2_unclassified;Rhodobium_2_unclassified;
1138	Proteobacteria;Alphaproteobacteria;Rhodobacterales;Rhodobacteraceae_1;Rhodobacteraceae_1_unclassified;Rhodobacteraceae_1_unclassified;Rhodobacteraceae_1_unclassified;.2
1139	Proteobacteria;Alphaproteobacteria;Rhodobacterales;Rhodobacteraceae_1;Rhodobacteraceae_1_unclassified;Rhodobacteraceae_1_unclassified;Rhodobacteraceae_1_unclassified;
1140	Proteobacteria;Alphaproteobacteria;Rhodobacterales;Rhodobacteraceae_1;Rhodobacteraceae_1_unclassified;Rhodobacteraceae_1_unclassified;Rhodobacteraceae_1_unclassified;
1141	Proteobacteria;Alphaproteobacteria;Rhodobacterales;Rhodobacteraceae_1;Rhodobacteraceae_1_unclassified;Rhodobacteraceae_1_unclassified;Rhodobacteraceae_1_unclassified;
1142	Proteobacteria;Alphaproteobacteria;Rhodospirillales_1;Acetobacteraceae;Roseomonas_1;Roseomonas_1_unclassified;Roseomonas_1_unclassified;
1143	Proteobacteria;Alphaproteobacteria;Rhodospirillales_1;Acetobacteraceae;Uncultured_4;Uncultured_4_unclassified;Uncultured_4_unclassified;
1144	Proteobacteria;Alphaproteobacteria;Rhodospirillales_1;Rhodospirillaceae;Thalassospira;Thalassospira_unclassified;Thalassospira_unclassified;.19
1145	Proteobacteria;Alphaproteobacteria;Rhodospirillales_1;Rhodospirillaceae;Thalassospira;Thalassospira_unclassified;Thalassospira_unclassified;.3
1146	Proteobacteria;Alphaproteobacteria;Rhodospirillales_1;Rhodospirillaceae;Uncultured_1;Uncultured_1_unclassified;Uncultured_1_unclassified;
1147	Proteobacteria;Alphaproteobacteria;Rhodospirillales_2;DA111;DA111_unclassified;DA111_unclassified;DA111_unclassified;
1148	Proteobacteria;Alphaproteobacteria;Rhodospirillales_2;DA111;DA111_unclassified;DA111_unclassified;DA111_unclassified;.2
1149	Proteobacteria;Alphaproteobacteria;Rhodospirillales_2;DA111;DA111_unclassified;DA111_unclassified;DA111_unclassified;.3
1150	Proteobacteria;Alphaproteobacteria;Rhodospirillales_2;DA111;DA111_unclassified;DA111_unclassified;DA111_unclassified;.31
1151	Proteobacteria;Alphaproteobacteria;Rhodospirillales_2;DA111;DA111_unclassified;DA111_unclassified;DA111_unclassified;.4
1152	Proteobacteria;Alphaproteobacteria;Rhodospirillales_2;DA111;DA111_unclassified;DA111_unclassified;DA111_unclassified;.5
1153	Proteobacteria;Alphaproteobacteria;Rhodospirillales_2;DA111;DA111_unclassified;DA111_unclassified;DA111_unclassified;.6
1154	Proteobacteria;Alphaproteobacteria;Rhodospirillales_2;DA111;DA111_unclassified;DA111_unclassified;DA111_unclassified;.7
1155	Proteobacteria;Alphaproteobacteria;Rhodospirillales_2;DA111;DA111_unclassified;DA111_unclassified;DA111_unclassified;
1156	Proteobacteria;Alphaproteobacteria;Rhodospirillales_2;DA111;DA111_unclassified;DA111_unclassified;DA111_unclassified;
1157	Proteobacteria;Alphaproteobacteria;Rhodospirillales_2;DA111;DA111_unclassified;DA111_unclassified;DA111_unclassified;.1
1158	Proteobacteria;Alphaproteobacteria;Rhodospirillales_2;DA111;DA111_unclassified;DA111_unclassified;DA111_unclassified;
1159	Proteobacteria;Alphaproteobacteria;Rhodospirillales_2;I-10;I-10_unclassified;I-10_unclassified;I-10_unclassified;.1
1160	Proteobacteria;Alphaproteobacteria;Rhodospirillales_2;JG37-AG-20;JG37-AG-20_unclassified;JG37-AG-20_unclassified;JG37-AG-20_unclassified;
1161	Proteobacteria;Alphaproteobacteria;Rhodospirillales_2;JG37-AG-20;JG37-AG-20_unclassified;JG37-AG-20_unclassified;JG37-AG-20_unclassified;.1
1162	Proteobacteria;Alphaproteobacteria;Rhodospirillales_2;MNH4;MNH4_unclassified;MNH4_unclassified;MNH4_unclassified;
1163	Proteobacteria;Alphaproteobacteria;Rhodospirillales_2;Rhodospirillaceae_2;Skermanella;Skermanella_unclassified;Skermanella_unclassified;
1164	Proteobacteria;Alphaproteobacteria;Rhodospirillales_2;Rhodospirillales_2_unclassified;Rhodospirillales_2_unclassified;Rhodospirillales_2_unclassified;Rhodospirillales_2_unclassified;
1165	Proteobacteria;Alphaproteobacteria;Rhodospirillales_2;Rhodospirillales_2_unclassified;Rhodospirillales_2_unclassified;Rhodospirillales_2_unclassified;Rhodospirillales_2_unclassified;.1
1166	Proteobacteria;Alphaproteobacteria;Rhodospirillales_2;Rhodospirillales_2_unclassified;Rhodospirillales_2_unclassified;Rhodospirillales_2_unclassified;Rhodospirillales_2_unclassified;.2
1167	Proteobacteria;Alphaproteobacteria;Rhodospirillales_2;wr0007;wr0007_unclassified;wr0007_unclassified;wr0007_unclassified;
1168	Proteobacteria;Alphaproteobacteria;Rhodospirillales_2;wr0007;wr0007_unclassified;wr0007_unclassified;wr0007_unclassified;.1
1169	Proteobacteria;Alphaproteobacteria;Rhodospirillales_2;wr0007;wr0007_unclassified;wr0007_unclassified;wr0007_unclassified;.2
1170	Proteobacteria;Alphaproteobacteria;Rhodospirillales_2;wr0007;wr0007_unclassified;wr0007_unclassified;wr0007_unclassified;.3
1171	Proteobacteria;Alphaproteobacteria;Rickettsiales;Candidatus_Midichloria;Candidatus_Midichloria;Candidatus_Midichloria_unclassified;Candidatus_Midichloria_unclassified;
1172	Proteobacteria;Alphaproteobacteria;Rickettsiales;Candidatus_Odyssella;Candidatus_Odyssella;Candidatus_Odyssella_unclassified;Candidatus_Odyssella_unclassified;
1173	Proteobacteria;Alphaproteobacteria;Sphingomonadales;Sphingomonadaceae;Novosphingobium_2;Novosphingobium_2_unclassified;Novosphingobium_2_unclassified;
1174	Proteobacteria;Alphaproteobacteria;Sphingomonadales;Sphingomonadaceae;Novosphingobium_2;Novosphingobium_2_unclassified;Novosphingobium_2_unclassified;
1175	Proteobacteria;Alphaproteobacteria;Sphingomonadales;Sphingomonadaceae;Sphingomonas_2;Sphingomonas_2_unclassified;Sphingomonas_2_unclassified;
1176	Proteobacteria;Alphaproteobacteria;Sphingomonadales;Sphingomonadaceae;Sphingomonas_2;Sphingomonas_2_unclassified;Sphingomonas_2_unclassified;.1
1177	Proteobacteria;Alphaproteobacteria;Sphingomonadales;Sphingomonadaceae;Sphingomonas_2;Sphingomonas_2_unclassified;Sphingomonas_2_unclassified;
1178	Proteobacteria;Betaproteobacteria;B1-7BS;B1-7BS_unclassified;B1-7BS_unclassified;B1-7BS_unclassified;B1-7BS_unclassified;
1179	Proteobacteria;Betaproteobacteria;Betaproteobacteria_unclassified;Betaproteobacteria_unclassified;Betaproteobacteria_unclassified;Betaproteobacteria_unclassified;Betaproteobacteria_unclassified;.11
1180	Proteobacteria;Betaproteobacteria;Betaproteobacteria_unclassified;Betaproteobacteria_unclassified;Betaproteobacteria_unclassified;Betaproteobacteria_unclassified;Betaproteobacteria_unclassified;.12
1181	Proteobacteria;Betaproteobacteria;Betaproteobacteria_unclassified;Betaproteobacteria_unclassified;Betaproteobacteria_unclassified;Betaproteobacteria_unclassified;Betaproteobacteria_unclassified;.13
1182	Proteobacteria;Betaproteobacteria;Betaproteobacteria_unclassified;Betaproteobacteria_unclassified;Betaproteobacteria_unclassified;Betaproteobacteria_unclassified;Betaproteobacteria_unclassified;.14
1183	Proteobacteria;Betaproteobacteria;Betaproteobacteria_unclassified;Betaproteobacteria_unclassified;Betaproteobacteria_unclassified;Betaproteobacteria_unclassified;Betaproteobacteria_unclassified;.15
1184	Proteobacteria;Betaproteobacteria;Betaproteobacteria_unclassified;Betaproteobacteria_unclassified;Betaproteobacteria_unclassified;Betaproteobacteria_unclassified;Betaproteobacteria_unclassified;.16
1185	Proteobacteria;Betaproteobacteria;Betaproteobacteria_unclassified;Betaproteobacteria_unclassified;Betaproteobacteria_unclassified;Betaproteobacteria_unclassified;Betaproteobacteria_unclassified;.17
1186	Proteobacteria;Betaproteobacteria;Betaproteobacteria_unclassified;Betaproteobacteria_unclassified;Betaproteobacteria_unclassified;Betaproteobacteria_unclassified;Betaproteobacteria_unclassified;.18
1187	Proteobacteria;Betaproteobacteria;Betaproteobacteria_unclassified;Betaproteobacteria_unclassified;Betaproteobacteria_unclassified;Betaproteobacteria_unclassified;Betaproteobacteria_unclassified;.19
1188	Proteobacteria;Betaproteobacteria;Betaproteobacteria_unclassified;Betaproteobacteria_unclassified;Betaproteobacteria_unclassified;Betaproteobacteria_unclassified;Betaproteobacteria_unclassified;.2
1189	Proteobacteria;Betaproteobacteria;Betaproteobacteria_unclassified;Betaproteobacteria_unclassified;Betaproteobacteria_unclassified;Betaproteobacteria_unclassified;Betaproteobacteria_unclassified;.21
1190	Proteobacteria;Betaproteobacteria;Betaproteobacteria_unclassified;Betaproteobacteria_unclassified;Betaproteobacteria_unclassified;Betaproteobacteria_unclassified;Betaproteobacteria_unclassified;.22
1191	Proteobacteria;Betaproteobacteria;Betaproteobacteria_unclassified;Betaproteobacteria_unclassified;Betaproteobacteria_unclassified;Betaproteobacteria_unclassified;Betaproteobacteria_unclassified;.23
1192	Proteobacteria;Betaproteobacteria;Betaproteobacteria_unclassified;Betaproteobacteria_unclassified;Betaproteobacteria_unclassified;Betaproteobacteria_unclassified;Betaproteobacteria_unclassified;.27
1193	Proteobacteria;Betaproteobacteria;Betaproteobacteria_unclassified;Betaproteobacteria_unclassified;Betaproteobacteria_unclassified;Betaproteobacteria_unclassified;Betaproteobacteria_unclassified;.32
1194	Proteobacteria;Betaproteobacteria;Betaproteobacteria_unclassified;Betaproteobacteria_unclassified;Betaproteobacteria_unclassified;Betaproteobacteria_unclassified;Betaproteobacteria_unclassified;.34
1195	Proteobacteria;Betaproteobacteria;Betaproteobacteria_unclassified;Betaproteobacteria_unclassified;Betaproteobacteria_unclassified;Betaproteobacteria_unclassified;Betaproteobacteria_unclassified;.38
1196	Proteobacteria;Betaproteobacteria;Betaproteobacteria_unclassified;Betaproteobacteria_unclassified;Betaproteobacteria_unclassified;Betaproteobacteria_unclassified;Betaproteobacteria_unclassified;.43
1197	Proteobacteria;Betaproteobacteria;Betaproteobacteria_unclassified;Betaproteobacteria_unclassified;Betaproteobacteria_unclassified;Betaproteobacteria_unclassified;Betaproteobacteria_unclassified;.7
1198	Proteobacteria;Betaproteobacteria;Betaproteobacteria_unclassified;Betaproteobacteria_unclassified;Betaproteobacteria_unclassified;Betaproteobacteria_unclassified;Betaproteobacteria_unclassified;.8
1199	Proteobacteria;Betaproteobacteria;Betaproteobacteria_unclassified;Betaproteobacteria_unclassified;Betaproteobacteria_unclassified;Betaproteobacteria_unclassified;Betaproteobacteria_unclassified;.9
1200	Proteobacteria;Betaproteobacteria;Burkholderiales;Alcaligenaceae_1;Achromobacter_2;Achromobacter_2_unclassified;Achromobacter_2_unclassified;
1201	Proteobacteria;Betaproteobacteria;Burkholderiales;Alcaligenaceae_1;Alcaligenes;Alcaligenes_unclassified;Alcaligenes_unclassified;
1202	Proteobacteria;Betaproteobacteria;Burkholderiales;Alcaligenaceae_1;Alcaligenes;Alcaligenes_unclassified;Alcaligenes_unclassified;
1203	Proteobacteria;Betaproteobacteria;Burkholderiales;Burkholderiaceae_1;Burkholderiaceae_1_unclassified;Burkholderiaceae_1_unclassified;Burkholderiaceae_1_unclassified;
1204	Proteobacteria;Betaproteobacteria;Burkholderiales;Burkholderiaceae;Chitinimonas;Chitinimonas_unclassified;Chitinimonas_unclassified;
1205	Proteobacteria;Betaproteobacteria;Burkholderiales;Burkholderiaceae;Chitinimonas;Chitinimonas_unclassified;Chitinimonas_unclassified;
1206	Proteobacteria;Betaproteobacteria;Burkholderiales;Burkholderiales_unclassified;Burkholderiales_unclassified;Burkholderiales_unclassified;Burkholderiales_unclassified;
1207	Proteobacteria;Betaproteobacteria;Burkholderiales;Comamonadaceae;Comamonadaceae_unclassified;Comamonadaceae_unclassified;Comamonadaceae_unclassified;.1
1208	Proteobacteria;Betaproteobacteria;Burkholderiales;Comamonadaceae;Comamonadaceae_unclassified;Comamonadaceae_unclassified;Comamonadaceae_unclassified;.2
1209	Proteobacteria;Betaproteobacteria;Burkholderiales;Comamonadaceae;Comamonadaceae_unclassified;Comamonadaceae_unclassified;Comamonadaceae_unclassified;.59
1210	Proteobacteria;Betaproteobacteria;Burkholderiales;Comamonadaceae;Comamonadaceae_unclassified;Comamonadaceae_unclassified;Comamonadaceae_unclassified;.7
1211	Proteobacteria;Betaproteobacteria;Burkholderiales;Comamonadaceae;Comamonadaceae_unclassified;Comamonadaceae_unclassified;Comamonadaceae_unclassified;
1212	Proteobacteria;Betaproteobacteria;Burkholderiales;Comamonadaceae;Comamonadaceae_unclassified;Comamonadaceae_unclassified;Comamonadaceae_unclassified;
1213	Proteobacteria;Betaproteobacteria;Burkholderiales;Comamonadaceae;Comamonadaceae_unclassified;Comamonadaceae_unclassified;Comamonadaceae_unclassified;
1214	Proteobacteria;Betaproteobacteria;Burkholderiales;Comamonadaceae;Comamonadaceae_unclassified;Comamonadaceae_unclassified;Comamonadaceae_unclassified;*
1215	Proteobacteria;Betaproteobacteria;Burkholderiales;Comamonadaceae;Rhodoferax;Rhodoferax_unclassified;Rhodoferax_unclassified;*
1216	Proteobacteria;Betaproteobacteria;Burkholderiales;Comamonadaceae;Uncultured_23;Uncultured_23_unclassified;Uncultured_23_unclassified;
1217	Proteobacteria;Betaproteobacteria;Burkholderiales;Oxalobacteraceae;Oxalobacteraceae_unclassified;Oxalobacteraceae_unclassified;Oxalobacteraceae_unclassified;
1218	Proteobacteria;Betaproteobacteria;Burkholderiales;Oxalobacteraceae;Oxalobacteraceae_unclassified;Oxalobacteraceae_unclassified;Oxalobacteraceae_unclassified;
1219	Proteobacteria;Betaproteobacteria;Burkholderiales;Oxalobacteraceae;Undibacterium;Undibacterium_unclassified;Undibacterium_unclassified;
1220	Proteobacteria;Betaproteobacteria;Burkholderiales;Oxalobacteraceae;Oxalobacteraceae_unclassified;Oxalobacteraceae_unclassified;Oxalobacteraceae_unclassified;
1221	Proteobacteria;Betaproteobacteria;Methylophilales;Methylophilaceae;Uncultured;Uncultured_unclassified;Uncultured_unclassified;
1222	Proteobacteria;Betaproteobacteria;Nitrosomonadales;Nitrosomonadaceae;Uncultured_1;Uncultured_1_unclassified;Uncultured_1_unclassified;
1223	Proteobacteria;Betaproteobacteria;Nitrosomonadales;Nitrosomonadaceae;Uncultured_1;Uncultured_1_unclassified;Uncultured_1_unclassified;.1
1224	Proteobacteria;Betaproteobacteria;Nitrosomonadales;Nitrosomonadaceae;Uncultured_1;Uncultured_1_unclassified;Uncultured_1_unclassified;.10
1225	Proteobacteria;Betaproteobacteria;Nitrosomonadales;Nitrosomonadaceae;Uncultured_1;Uncultured_1_unclassified;Uncultured_1_unclassified;.11
1226	Proteobacteria;Betaproteobacteria;Nitrosomonadales;Nitrosomonadaceae;Uncultured_1;Uncultured_1_unclassified;Uncultured_1_unclassified;.12
1227	Proteobacteria;Betaproteobacteria;Nitrosomonadales;Nitrosomonadaceae;Uncultured_1;Uncultured_1_unclassified;Uncultured_1_unclassified;.13
1228	Proteobacteria;Betaproteobacteria;Nitrosomonadales;Nitrosomonadaceae;Uncultured_1;Uncultured_1_unclassified;Uncultured_1_unclassified;.2
1229	Proteobacteria;Betaproteobacteria;Nitrosomonadales;Nitrosomonadaceae;Uncultured_1;Uncultured_1_unclassified;Uncultured_1_unclassified;.25
1230	Proteobacteria;Betaproteobacteria;Nitrosomonadales;Nitrosomonadaceae;Uncultured_1;Uncultured_1_unclassified;Uncultured_1_unclassified;.3
1231	Proteobacteria;Betaproteobacteria;Nitrosomonadales;Nitrosomonadaceae;Uncultured_1;Uncultured_1_unclassified;Uncultured_1_unclassified;.4
1232	Proteobacteria;Betaproteobacteria;Nitrosomonadales;Nitrosomonadaceae;Uncultured_1;Uncultured_1_unclassified;Uncultured_1_unclassified;.5
1233	Proteobacteria;Betaproteobacteria;Nitrosomonadales;Nitrosomonadaceae;Uncultured_1;Uncultured_1_unclassified;Uncultured_1_unclassified;.6
1234	Proteobacteria;Betaproteobacteria;Nitrosomonadales;Nitrosomonadaceae;Uncultured_1;Uncultured_1_unclassified;Uncultured_1_unclassified;.7
1235	Proteobacteria;Betaproteobacteria;Nitrosomonadales;Nitrosomonadaceae;Uncultured_1;Uncultured_1_unclassified;Uncultured_1_unclassified;.8
1236	Proteobacteria;Betaproteobacteria;Nitrosomonadales;Nitrosomonadaceae;Uncultured_1;Uncultured_1_unclassified;Uncultured_1_unclassified;.9
1237	Proteobacteria;Betaproteobacteria;Nitrosomonadales;Nitrosomonadaceae;Uncultured_1;Uncultured_1_unclassified;Uncultured_1_unclassified;
1238	Proteobacteria;Betaproteobacteria;Nitrosomonadales;Nitrosomonadaceae;Uncultured_1;Uncultured_1_unclassified;Uncultured_1_unclassified;.1
1239	Proteobacteria;Betaproteobacteria;Nitrosomonadales;Nitrosomonadaceae;Uncultured_2;Uncultured_2_unclassified;Uncultured_2_unclassified;
1240	Proteobacteria;Betaproteobacteria;Nitrosomonadales;Nitrosomonadaceae;Uncultured_2;Uncultured_2_unclassified;Uncultured_2_unclassified;.1
1241	Proteobacteria;Betaproteobacteria;Nitrosomonadales;Nitrosomonadaceae;Uncultured_2;Uncultured_2_unclassified;Uncultured_2_unclassified;.2
1242	Proteobacteria;Betaproteobacteria;Nitrosomonadales;Nitrosomonadaceae;Uncultured_2;Uncultured_2_unclassified;Uncultured_2_unclassified;.6
1243	Proteobacteria;Betaproteobacteria;Nitrosomonadales;Nitrosomonadaceae;Uncultured_2;Uncultured_2_unclassified;Uncultured_2_unclassified;
1244	Proteobacteria;Betaproteobacteria;Rhodocyclales;Rhodocyclaceae_1;Rhodocyclaceae_1_unclassified;Rhodocyclaceae_1_unclassified;Rhodocyclaceae_1_unclassified;
1245	Proteobacteria;Betaproteobacteria;Rhodocyclales;Rhodocyclaceae_1;Rhodocyclaceae_1_unclassified;Rhodocyclaceae_1_unclassified;Rhodocyclaceae_1_unclassified;
1246	Proteobacteria;Betaproteobacteria;Rhodocyclales;Rhodocyclaceae_2;Insect_cluster;Insect_cluster_unclassified;Insect_cluster_unclassified;
1247	Proteobacteria;Betaproteobacteria;Rhodocyclales;Rhodocyclaceae_3;Rhodocyclaceae_3_unclassified;Rhodocyclaceae_3_unclassified;Rhodocyclaceae_3_unclassified;
1248	Proteobacteria;Betaproteobacteria;Rhodocyclales;Rhodocyclaceae_3;Termite_cluster;Termite_cluster_unclassified;Termite_cluster_unclassified;
1249	Proteobacteria;Betaproteobacteria;Rhodocyclales;Rhodocyclales_unclassified;Rhodocyclales_unclassified;Rhodocyclales_unclassified;Rhodocyclales_unclassified;
1250	Proteobacteria;Betaproteobacteria;SC-I-84;Insect_cluster_II;Insect_cluster_II_unclassified;Insect_cluster_II_unclassified;Insect_cluster_II_unclassified;
1251	Proteobacteria;Betaproteobacteria;SC-I-84;Insect_cluster_II;Insect_cluster_II_unclassified;Insect_cluster_II_unclassified;Insect_cluster_II_unclassified;
1252	Proteobacteria;Betaproteobacteria;SC-I-84;SC-I-84_unclassified;SC-I-84_unclassified;SC-I-84_unclassified;SC-I-84_unclassified;
1253	Proteobacteria;Betaproteobacteria;SC-I-84;SC-I-84_unclassified;SC-I-84_unclassified;SC-I-84_unclassified;SC-I-84_unclassified;.1
1254	Proteobacteria;Betaproteobacteria;SC-I-84;SC-I-84_unclassified;SC-I-84_unclassified;SC-I-84_unclassified;SC-I-84_unclassified;.11
1255	Proteobacteria;Betaproteobacteria;SC-I-84;SC-I-84_unclassified;SC-I-84_unclassified;SC-I-84_unclassified;SC-I-84_unclassified;.15
1256	Proteobacteria;Betaproteobacteria;SC-I-84;SC-I-84_unclassified;SC-I-84_unclassified;SC-I-84_unclassified;SC-I-84_unclassified;.17
1257	Proteobacteria;Betaproteobacteria;SC-I-84;SC-I-84_unclassified;SC-I-84_unclassified;SC-I-84_unclassified;SC-I-84_unclassified;.2
1258	Proteobacteria;Betaproteobacteria;SC-I-84;SC-I-84_unclassified;SC-I-84_unclassified;SC-I-84_unclassified;SC-I-84_unclassified;.3
1259	Proteobacteria;Betaproteobacteria;SC-I-84;SC-I-84_unclassified;SC-I-84_unclassified;SC-I-84_unclassified;SC-I-84_unclassified;.4
1260	Proteobacteria;Betaproteobacteria;SC-I-84;SC-I-84_unclassified;SC-I-84_unclassified;SC-I-84_unclassified;SC-I-84_unclassified;.5
1261	Proteobacteria;Betaproteobacteria;SC-I-84;SC-I-84_unclassified;SC-I-84_unclassified;SC-I-84_unclassified;SC-I-84_unclassified;.6
1262	Proteobacteria;Betaproteobacteria;SC-I-84;SC-I-84_unclassified;SC-I-84_unclassified;SC-I-84_unclassified;SC-I-84_unclassified;.7
1263	Proteobacteria;Betaproteobacteria;SC-I-84;SC-I-84_unclassified;SC-I-84_unclassified;SC-I-84_unclassified;SC-I-84_unclassified;.8
1264	Proteobacteria;Betaproteobacteria;SC-I-84;SC-I-84_unclassified;SC-I-84_unclassified;SC-I-84_unclassified;SC-I-84_unclassified;.9
1265	Proteobacteria;Betaproteobacteria;TRA3-20;TRA3-20_unclassified;TRA3-20_unclassified;TRA3-20_unclassified;TRA3-20_unclassified;
1266	Proteobacteria;Betaproteobacteria;TRA3-20;TRA3-20_unclassified;TRA3-20_unclassified;TRA3-20_unclassified;TRA3-20_unclassified;.1
1267	Proteobacteria;Betaproteobacteria;TRA3-20;TRA3-20_unclassified;TRA3-20_unclassified;TRA3-20_unclassified;TRA3-20_unclassified;.2
1268	Proteobacteria;Betaproteobacteria;TRA3-20;TRA3-20_unclassified;TRA3-20_unclassified;TRA3-20_unclassified;TRA3-20_unclassified;.3
1269	Proteobacteria;Betaproteobacteria;TRA3-20;TRA3-20_unclassified;TRA3-20_unclassified;TRA3-20_unclassified;TRA3-20_unclassified;.4
1270	Proteobacteria;Betaproteobacteria;TRA3-20;TRA3-20_unclassified;TRA3-20_unclassified;TRA3-20_unclassified;TRA3-20_unclassified;.5
1271	Proteobacteria;Deltaproteobacteria;Bdellovibrionales;Bacteriovoraceae;Bacteriovoraceae_unclassified;Bacteriovoraceae_unclassified;Bacteriovoraceae_unclassified;
1272	Proteobacteria;Deltaproteobacteria;Bdellovibrionales;Bacteriovoraceae;Bacteriovoraceae_unclassified;Bacteriovoraceae_unclassified;Bacteriovoraceae_unclassified;.1
1273	Proteobacteria;Deltaproteobacteria;Bdellovibrionales;Bdellovibrionaceae;Bdellovibrio;Bdellovibrio_unclassified;Bdellovibrio_unclassified;.23
1274	Proteobacteria;Deltaproteobacteria;Bdellovibrionales;Bdellovibrionaceae;Bdellovibrio;Bdellovibrio_unclassified;Bdellovibrio_unclassified;.24
1275	Proteobacteria;Deltaproteobacteria;Bdellovibrionales;Bdellovibrionaceae;OM27_clade;OM27_clade_unclassified;OM27_clade_unclassified;.1
1276	Proteobacteria;Deltaproteobacteria;Deltaproteobacteria_unclassified;Deltaproteobacteria_unclassified;Deltaproteobacteria_unclassified;Deltaproteobacteria_unclassified;Deltaproteobacteria_unclassified;.1
1277	Proteobacteria;Deltaproteobacteria;Deltaproteobacteria_unclassified;Deltaproteobacteria_unclassified;Deltaproteobacteria_unclassified;Deltaproteobacteria_unclassified;Deltaproteobacteria_unclassified;.18
1278	Proteobacteria;Deltaproteobacteria;Deltaproteobacteria_unclassified;Deltaproteobacteria_unclassified;Deltaproteobacteria_unclassified;Deltaproteobacteria_unclassified;Deltaproteobacteria_unclassified;.19
1279	Proteobacteria;Deltaproteobacteria;Deltaproteobacteria_unclassified;Deltaproteobacteria_unclassified;Deltaproteobacteria_unclassified;Deltaproteobacteria_unclassified;Deltaproteobacteria_unclassified;.2
1280	Proteobacteria;Deltaproteobacteria;Deltaproteobacteria_unclassified;Deltaproteobacteria_unclassified;Deltaproteobacteria_unclassified;Deltaproteobacteria_unclassified;Deltaproteobacteria_unclassified;.28
1281	Proteobacteria;Deltaproteobacteria;Deltaproteobacteria_unclassified;Deltaproteobacteria_unclassified;Deltaproteobacteria_unclassified;Deltaproteobacteria_unclassified;Deltaproteobacteria_unclassified;.5
1282	Proteobacteria;Deltaproteobacteria;Deltaproteobacteria_unclassified;Deltaproteobacteria_unclassified;Deltaproteobacteria_unclassified;Deltaproteobacteria_unclassified;Deltaproteobacteria_unclassified;.71
1283	Proteobacteria;Deltaproteobacteria;Deltaproteobacteria_unclassified;Deltaproteobacteria_unclassified;Deltaproteobacteria_unclassified;Deltaproteobacteria_unclassified;Deltaproteobacteria_unclassified;.9
1284	Proteobacteria;Deltaproteobacteria;Desulfarculales;Desulfarculaceae;Desulfarculus;Desulfarculus_unclassified;Desulfarculus_unclassified;.1
1285	Proteobacteria;Deltaproteobacteria;Desulfarculales;Desulfarculaceae;Desulfarculus;Desulfarculus_unclassified;Desulfarculus_unclassified;.2
1286	Proteobacteria;Deltaproteobacteria;Desulfobacterales;Desulfobacteraceae;Desulfatiferula;Desulfatiferula_unclassified;Desulfatiferula_unclassified;
1287	Proteobacteria;Deltaproteobacteria;Desulfobacterales;Desulfobacteraceae;Desulfobacteraceae_unclassified;Desulfobacteraceae_unclassified;Desulfobacteraceae_unclassified;.1*
1288	Proteobacteria;Deltaproteobacteria;Desulfobacterales;Desulfobacteraceae;Desulfobotulus;Desulfobotulus_unclassified;Desulfobotulus_unclassified;
1289	Proteobacteria;Deltaproteobacteria;Desulfobacterales;Desulfobacteraceae;Uncultured_5;Uncultured_5_unclassified;Uncultured_5_unclassified;
1290	Proteobacteria;Deltaproteobacteria;Desulfobacterales;Desulfobulbaceae;Desulfobulbus;Desulfobulbus_unclassified;Desulfobulbus_unclassified;.1
1291	Proteobacteria;Deltaproteobacteria;Desulfobacterales;Desulfobulbaceae;Desulfobulbus;Desulfobulbus_unclassified;Desulfobulbus_unclassified;.2
1292	Proteobacteria;Deltaproteobacteria;Desulfovibrionales;Desulfovibrionaceae;Desulfovibrio_5;Desulfovibrio_5_unclassified;Desulfovibrio_5_unclassified;
1293	Proteobacteria;Deltaproteobacteria;Desulfovibrionales;Desulfovibrionaceae;Desulfovibrionaceae_unclassified;Desulfovibrionaceae_unclassified;Desulfovibrionaceae_unclassified;
1294	Proteobacteria;Deltaproteobacteria;Desulfovibrionales;Desulfovibrionaceae;Desulfovibrionaceae_unclassified;Desulfovibrionaceae_unclassified;Desulfovibrionaceae_unclassified;
1295	Proteobacteria;Deltaproteobacteria;Desulfovibrionales;Desulfovibrionaceae;Gut_cluster_2;Gut_cluster_2_unclassified;Gut_cluster_2_unclassified;
1296	Proteobacteria;Deltaproteobacteria;Desulfovibrionales;Desulfovibrionaceae;Gut_cluster_2;Gut_cluster_2_unclassified;Gut_cluster_2_unclassified;.1
1297	Proteobacteria;Deltaproteobacteria;Desulfovibrionales;Desulfovibrionaceae;Gut_cluster_2;Gut_cluster_2_unclassified;Gut_cluster_2_unclassified;.3
1298	Proteobacteria;Deltaproteobacteria;Desulfovibrionales;Desulfovibrionaceae;Gut_cluster_3;Gut_cluster_3_unclassified;Gut_cluster_3_unclassified;.1
1299	Proteobacteria;Deltaproteobacteria;Desulfovibrionales;Desulfovibrionaceae;Gut_cluster_3;Gut_cluster_3_unclassified;Gut_cluster_3_unclassified;.10
1300	Proteobacteria;Deltaproteobacteria;Desulfovibrionales;Desulfovibrionaceae;Gut_cluster_3;Gut_cluster_3_unclassified;Gut_cluster_3_unclassified;.11
1301	Proteobacteria;Deltaproteobacteria;Desulfovibrionales;Desulfovibrionaceae;Gut_cluster_3;Gut_cluster_3_unclassified;Gut_cluster_3_unclassified;.13
1302	Proteobacteria;Deltaproteobacteria;Desulfovibrionales;Desulfovibrionaceae;Gut_cluster_3;Gut_cluster_3_unclassified;Gut_cluster_3_unclassified;.149
1303	Proteobacteria;Deltaproteobacteria;Desulfovibrionales;Desulfovibrionaceae;Gut_cluster_3;Gut_cluster_3_unclassified;Gut_cluster_3_unclassified;.15
1304	Proteobacteria;Deltaproteobacteria;Desulfovibrionales;Desulfovibrionaceae;Gut_cluster_3;Gut_cluster_3_unclassified;Gut_cluster_3_unclassified;.16
1305	Proteobacteria;Deltaproteobacteria;Desulfovibrionales;Desulfovibrionaceae;Gut_cluster_3;Gut_cluster_3_unclassified;Gut_cluster_3_unclassified;.17
1306	Proteobacteria;Deltaproteobacteria;Desulfovibrionales;Desulfovibrionaceae;Gut_cluster_3;Gut_cluster_3_unclassified;Gut_cluster_3_unclassified;.18
1307	Proteobacteria;Deltaproteobacteria;Desulfovibrionales;Desulfovibrionaceae;Gut_cluster_3;Gut_cluster_3_unclassified;Gut_cluster_3_unclassified;.19
1308	Proteobacteria;Deltaproteobacteria;Desulfovibrionales;Desulfovibrionaceae;Gut_cluster_3;Gut_cluster_3_unclassified;Gut_cluster_3_unclassified;.2
1309	Proteobacteria;Deltaproteobacteria;Desulfovibrionales;Desulfovibrionaceae;Gut_cluster_3;Gut_cluster_3_unclassified;Gut_cluster_3_unclassified;.21
1310	Proteobacteria;Deltaproteobacteria;Desulfovibrionales;Desulfovibrionaceae;Gut_cluster_3;Gut_cluster_3_unclassified;Gut_cluster_3_unclassified;.23
1311	Proteobacteria;Deltaproteobacteria;Desulfovibrionales;Desulfovibrionaceae;Gut_cluster_3;Gut_cluster_3_unclassified;Gut_cluster_3_unclassified;.25
1312	Proteobacteria;Deltaproteobacteria;Desulfovibrionales;Desulfovibrionaceae;Gut_cluster_3;Gut_cluster_3_unclassified;Gut_cluster_3_unclassified;.26
1313	Proteobacteria;Deltaproteobacteria;Desulfovibrionales;Desulfovibrionaceae;Gut_cluster_3;Gut_cluster_3_unclassified;Gut_cluster_3_unclassified;.27
1314	Proteobacteria;Deltaproteobacteria;Desulfovibrionales;Desulfovibrionaceae;Gut_cluster_3;Gut_cluster_3_unclassified;Gut_cluster_3_unclassified;.28
1315	Proteobacteria;Deltaproteobacteria;Desulfovibrionales;Desulfovibrionaceae;Gut_cluster_3;Gut_cluster_3_unclassified;Gut_cluster_3_unclassified;.3
1316	Proteobacteria;Deltaproteobacteria;Desulfovibrionales;Desulfovibrionaceae;Gut_cluster_3;Gut_cluster_3_unclassified;Gut_cluster_3_unclassified;.30
1317	Proteobacteria;Deltaproteobacteria;Desulfovibrionales;Desulfovibrionaceae;Gut_cluster_3;Gut_cluster_3_unclassified;Gut_cluster_3_unclassified;.33
1318	Proteobacteria;Deltaproteobacteria;Desulfovibrionales;Desulfovibrionaceae;Gut_cluster_3;Gut_cluster_3_unclassified;Gut_cluster_3_unclassified;.34
1319	Proteobacteria;Deltaproteobacteria;Desulfovibrionales;Desulfovibrionaceae;Gut_cluster_3;Gut_cluster_3_unclassified;Gut_cluster_3_unclassified;.37
1320	Proteobacteria;Deltaproteobacteria;Desulfovibrionales;Desulfovibrionaceae;Gut_cluster_3;Gut_cluster_3_unclassified;Gut_cluster_3_unclassified;.38
1321	Proteobacteria;Deltaproteobacteria;Desulfovibrionales;Desulfovibrionaceae;Gut_cluster_3;Gut_cluster_3_unclassified;Gut_cluster_3_unclassified;.4
1322	Proteobacteria;Deltaproteobacteria;Desulfovibrionales;Desulfovibrionaceae;Gut_cluster_3;Gut_cluster_3_unclassified;Gut_cluster_3_unclassified;.40
1323	Proteobacteria;Deltaproteobacteria;Desulfovibrionales;Desulfovibrionaceae;Gut_cluster_3;Gut_cluster_3_unclassified;Gut_cluster_3_unclassified;.44
1324	Proteobacteria;Deltaproteobacteria;Desulfovibrionales;Desulfovibrionaceae;Gut_cluster_3;Gut_cluster_3_unclassified;Gut_cluster_3_unclassified;.47
1325	Proteobacteria;Deltaproteobacteria;Desulfovibrionales;Desulfovibrionaceae;Gut_cluster_3;Gut_cluster_3_unclassified;Gut_cluster_3_unclassified;.48
1326	Proteobacteria;Deltaproteobacteria;Desulfovibrionales;Desulfovibrionaceae;Gut_cluster_3;Gut_cluster_3_unclassified;Gut_cluster_3_unclassified;.5
1327	Proteobacteria;Deltaproteobacteria;Desulfovibrionales;Desulfovibrionaceae;Gut_cluster_3;Gut_cluster_3_unclassified;Gut_cluster_3_unclassified;.53
1328	Proteobacteria;Deltaproteobacteria;Desulfovibrionales;Desulfovibrionaceae;Gut_cluster_3;Gut_cluster_3_unclassified;Gut_cluster_3_unclassified;.54
1329	Proteobacteria;Deltaproteobacteria;Desulfovibrionales;Desulfovibrionaceae;Gut_cluster_3;Gut_cluster_3_unclassified;Gut_cluster_3_unclassified;.6
1330	Proteobacteria;Deltaproteobacteria;Desulfovibrionales;Desulfovibrionaceae;Gut_cluster_3;Gut_cluster_3_unclassified;Gut_cluster_3_unclassified;.64
1331	Proteobacteria;Deltaproteobacteria;Desulfovibrionales;Desulfovibrionaceae;Gut_cluster_3;Gut_cluster_3_unclassified;Gut_cluster_3_unclassified;.65
1332	Proteobacteria;Deltaproteobacteria;Desulfovibrionales;Desulfovibrionaceae;Gut_cluster_3;Gut_cluster_3_unclassified;Gut_cluster_3_unclassified;.66
1333	Proteobacteria;Deltaproteobacteria;Desulfovibrionales;Desulfovibrionaceae;Gut_cluster_3;Gut_cluster_3_unclassified;Gut_cluster_3_unclassified;.7
1334	Proteobacteria;Deltaproteobacteria;Desulfovibrionales;Desulfovibrionaceae;Gut_cluster_3;Gut_cluster_3_unclassified;Gut_cluster_3_unclassified;.70
1335	Proteobacteria;Deltaproteobacteria;Desulfovibrionales;Desulfovibrionaceae;Gut_cluster_3;Gut_cluster_3_unclassified;Gut_cluster_3_unclassified;.8
1336	Proteobacteria;Deltaproteobacteria;Desulfovibrionales;Desulfovibrionaceae;Gut_cluster_3;Gut_cluster_3_unclassified;Gut_cluster_3_unclassified;.84
1337	Proteobacteria;Deltaproteobacteria;Desulfovibrionales;Desulfovibrionaceae;Gut_cluster_3;Gut_cluster_3_unclassified;Gut_cluster_3_unclassified;.85
1338	Proteobacteria;Deltaproteobacteria;Desulfovibrionales;Desulfovibrionaceae;Gut_cluster_3;Gut_cluster_3_unclassified;Gut_cluster_3_unclassified;.9
1339	Proteobacteria;Deltaproteobacteria;Desulfovibrionales;Desulfovibrionaceae;Gut_cluster_3;Gut_cluster_3_unclassified;Gut_cluster_3_unclassified;
1340	Proteobacteria;Deltaproteobacteria;Desulfovibrionales;Desulfovibrionaceae;Termite_cluster_III;Termite_cluster_III_unclassified;Termite_cluster_III_unclassified;
1341	Proteobacteria;Deltaproteobacteria;Desulfurellales;Desulfurellaceae;Uncultured;Uncultured_unclassified;Uncultured_unclassified;
1342	Proteobacteria;Deltaproteobacteria;Desulfurellales;Desulfurellaceae;Uncultured;Uncultured_unclassified;Uncultured_unclassified;.1
1343	Proteobacteria;Deltaproteobacteria;Desulfurellales;Desulfurellaceae;Uncultured;Uncultured_unclassified;Uncultured_unclassified;.2
1344	Proteobacteria;Deltaproteobacteria;Desulfurellales;Desulfurellaceae;Uncultured;Uncultured_unclassified;Uncultured_unclassified;.3
1345	Proteobacteria;Deltaproteobacteria;Desulfurellales;Desulfurellaceae;Uncultured;Uncultured_unclassified;Uncultured_unclassified;.5
1346	Proteobacteria;Deltaproteobacteria;Desulfuromonadales;Geobacteraceae;Geobacter_2;Geobacter_2_unclassified;Geobacter_2_unclassified;
1347	Proteobacteria;Deltaproteobacteria;Desulfuromonadales;Geobacteraceae;Geobacter_2;Geobacter_2_unclassified;Geobacter_2_unclassified;
1348	Proteobacteria;Deltaproteobacteria;Desulfuromonadales;Geobacteraceae;Geobacteraceae_unclassified;Geobacteraceae_unclassified;Geobacteraceae_unclassified;
1349	Proteobacteria;Deltaproteobacteria;Desulfuromonadales;Geobacteraceae;Geobacteraceae_unclassified;Geobacteraceae_unclassified;Geobacteraceae_unclassified;
1350	Proteobacteria;Deltaproteobacteria;Desulfuromonadales;Geobacteraceae;Geobacteraceae_unclassified;Geobacteraceae_unclassified;Geobacteraceae_unclassified;
1351	Proteobacteria;Deltaproteobacteria;Desulfuromonadales;Geobacteraceae;Geobacteraceae_unclassified;Geobacteraceae_unclassified;Geobacteraceae_unclassified;
1352	Proteobacteria;Deltaproteobacteria;Desulfuromonadales;Geobacteraceae;Geobacteraceae_unclassified;Geobacteraceae_unclassified;Geobacteraceae_unclassified;
1353	Proteobacteria;Deltaproteobacteria;GR-WP33-30;Uncultured_1;Uncultured_1_unclassified;Uncultured_1_unclassified;Uncultured_1_unclassified;
1354	Proteobacteria;Deltaproteobacteria;GR-WP33-30;Uncultured_1;Uncultured_1_unclassified;Uncultured_1_unclassified;Uncultured_1_unclassified;.1
1355	Proteobacteria;Deltaproteobacteria;GR-WP33-30;Uncultured_2;Uncultured_2_unclassified;Uncultured_2_unclassified;Uncultured_2_unclassified;
1356	Proteobacteria;Deltaproteobacteria;GR-WP33-30;Uncultured_2;Uncultured_2_unclassified;Uncultured_2_unclassified;Uncultured_2_unclassified;.1
1357	Proteobacteria;Deltaproteobacteria;GR-WP33-30;Uncultured_2;Uncultured_2_unclassified;Uncultured_2_unclassified;Uncultured_2_unclassified;.10
1358	Proteobacteria;Deltaproteobacteria;GR-WP33-30;Uncultured_2;Uncultured_2_unclassified;Uncultured_2_unclassified;Uncultured_2_unclassified;.11
1359	Proteobacteria;Deltaproteobacteria;GR-WP33-30;Uncultured_2;Uncultured_2_unclassified;Uncultured_2_unclassified;Uncultured_2_unclassified;.14
1360	Proteobacteria;Deltaproteobacteria;GR-WP33-30;Uncultured_2;Uncultured_2_unclassified;Uncultured_2_unclassified;Uncultured_2_unclassified;.2
1361	Proteobacteria;Deltaproteobacteria;GR-WP33-30;Uncultured_2;Uncultured_2_unclassified;Uncultured_2_unclassified;Uncultured_2_unclassified;.20
1362	Proteobacteria;Deltaproteobacteria;GR-WP33-30;Uncultured_2;Uncultured_2_unclassified;Uncultured_2_unclassified;Uncultured_2_unclassified;.21
1363	Proteobacteria;Deltaproteobacteria;GR-WP33-30;Uncultured_2;Uncultured_2_unclassified;Uncultured_2_unclassified;Uncultured_2_unclassified;.26
1364	Proteobacteria;Deltaproteobacteria;GR-WP33-30;Uncultured_2;Uncultured_2_unclassified;Uncultured_2_unclassified;Uncultured_2_unclassified;.3
1365	Proteobacteria;Deltaproteobacteria;GR-WP33-30;Uncultured_2;Uncultured_2_unclassified;Uncultured_2_unclassified;Uncultured_2_unclassified;.32
1366	Proteobacteria;Deltaproteobacteria;GR-WP33-30;Uncultured_2;Uncultured_2_unclassified;Uncultured_2_unclassified;Uncultured_2_unclassified;.5
1367	Proteobacteria;Deltaproteobacteria;GR-WP33-30;Uncultured_2;Uncultured_2_unclassified;Uncultured_2_unclassified;Uncultured_2_unclassified;.7
1368	Proteobacteria;Deltaproteobacteria;GR-WP33-30;Uncultured_2;Uncultured_2_unclassified;Uncultured_2_unclassified;Uncultured_2_unclassified;.8
1369	Proteobacteria;Deltaproteobacteria;Myxococcales;Cluster_319-6G20;Cluster_319-6G20_unclassified;Cluster_319-6G20_unclassified;Cluster_319-6G20_unclassified;
1370	Proteobacteria;Deltaproteobacteria;Myxococcales;Cluster_319-6G20;Cluster_319-6G20_unclassified;Cluster_319-6G20_unclassified;Cluster_319-6G20_unclassified;.2
1371	Proteobacteria;Deltaproteobacteria;Myxococcales;Cluster_319-6G20;Cluster_319-6G20_unclassified;Cluster_319-6G20_unclassified;Cluster_319-6G20_unclassified;.3
1372	Proteobacteria;Deltaproteobacteria;Myxococcales;Cluster_319-6G20;Cluster_319-6G20_unclassified;Cluster_319-6G20_unclassified;Cluster_319-6G20_unclassified;.4
1373	Proteobacteria;Deltaproteobacteria;Myxococcales;Cystobacteraceae;Anaeromyxobacter;Anaeromyxobacter_unclassified;Anaeromyxobacter_unclassified;
1374	Proteobacteria;Deltaproteobacteria;Myxococcales;Cystobacteraceae;Anaeromyxobacter;Anaeromyxobacter_unclassified;Anaeromyxobacter_unclassified;.2
1375	Proteobacteria;Deltaproteobacteria;Myxococcales;Cystobacteraceae;Anaeromyxobacter;Anaeromyxobacter_unclassified;Anaeromyxobacter_unclassified;.3
1376	Proteobacteria;Deltaproteobacteria;Myxococcales;Cystobacteraceae;Anaeromyxobacter;Anaeromyxobacter_unclassified;Anaeromyxobacter_unclassified;
1377	Proteobacteria;Deltaproteobacteria;Myxococcales;Haliangiaceae;Haliangium;Haliangium_unclassified;Haliangium_unclassified;
1378	Proteobacteria;Deltaproteobacteria;Myxococcales;Haliangiaceae;Haliangium;Haliangium_unclassified;Haliangium_unclassified;.1
1379	Proteobacteria;Deltaproteobacteria;Myxococcales;Haliangiaceae;Haliangium;Haliangium_unclassified;Haliangium_unclassified;.10
1380	Proteobacteria;Deltaproteobacteria;Myxococcales;Haliangiaceae;Haliangium;Haliangium_unclassified;Haliangium_unclassified;.12
1381	Proteobacteria;Deltaproteobacteria;Myxococcales;Haliangiaceae;Haliangium;Haliangium_unclassified;Haliangium_unclassified;.16
1382	Proteobacteria;Deltaproteobacteria;Myxococcales;Haliangiaceae;Haliangium;Haliangium_unclassified;Haliangium_unclassified;.17
1383	Proteobacteria;Deltaproteobacteria;Myxococcales;Haliangiaceae;Haliangium;Haliangium_unclassified;Haliangium_unclassified;.2
1384	Proteobacteria;Deltaproteobacteria;Myxococcales;Haliangiaceae;Haliangium;Haliangium_unclassified;Haliangium_unclassified;.3
1385	Proteobacteria;Deltaproteobacteria;Myxococcales;Haliangiaceae;Haliangium;Haliangium_unclassified;Haliangium_unclassified;.32
1386	Proteobacteria;Deltaproteobacteria;Myxococcales;Haliangiaceae;Haliangium;Haliangium_unclassified;Haliangium_unclassified;.35
1387	Proteobacteria;Deltaproteobacteria;Myxococcales;Haliangiaceae;Haliangium;Haliangium_unclassified;Haliangium_unclassified;.36
1388	Proteobacteria;Deltaproteobacteria;Myxococcales;Haliangiaceae;Haliangium;Haliangium_unclassified;Haliangium_unclassified;.4
1389	Proteobacteria;Deltaproteobacteria;Myxococcales;Haliangiaceae;Haliangium;Haliangium_unclassified;Haliangium_unclassified;.5
1390	Proteobacteria;Deltaproteobacteria;Myxococcales;Haliangiaceae;Haliangium;Haliangium_unclassified;Haliangium_unclassified;.6
1391	Proteobacteria;Deltaproteobacteria;Myxococcales;Haliangiaceae;Haliangium;Haliangium_unclassified;Haliangium_unclassified;.7
1392	Proteobacteria;Deltaproteobacteria;Myxococcales;Haliangiaceae;Haliangium;Haliangium_unclassified;Haliangium_unclassified;.8
1393	Proteobacteria;Deltaproteobacteria;Myxococcales;Haliangiaceae;Haliangium;Haliangium_unclassified;Haliangium_unclassified;.9
1394	Proteobacteria;Deltaproteobacteria;Myxococcales;JG37-AG-15;JG37-AG-15_unclassified;JG37-AG-15_unclassified;JG37-AG-15_unclassified;
1395	Proteobacteria;Deltaproteobacteria;Myxococcales;JG37-AG-15;JG37-AG-15_unclassified;JG37-AG-15_unclassified;JG37-AG-15_unclassified;.1
1396	Proteobacteria;Deltaproteobacteria;Myxococcales;JG37-AG-15;JG37-AG-15_unclassified;JG37-AG-15_unclassified;JG37-AG-15_unclassified;.17
1397	Proteobacteria;Deltaproteobacteria;Myxococcales;JG37-AG-15;JG37-AG-15_unclassified;JG37-AG-15_unclassified;JG37-AG-15_unclassified;.26
1398	Proteobacteria;Deltaproteobacteria;Myxococcales;JG37-AG-15;JG37-AG-15_unclassified;JG37-AG-15_unclassified;JG37-AG-15_unclassified;.3
1399	Proteobacteria;Deltaproteobacteria;Myxococcales;JG37-AG-15;JG37-AG-15_unclassified;JG37-AG-15_unclassified;JG37-AG-15_unclassified;.4
1400	Proteobacteria;Deltaproteobacteria;Myxococcales;JG37-AG-15;JG37-AG-15_unclassified;JG37-AG-15_unclassified;JG37-AG-15_unclassified;.5
1401	Proteobacteria;Deltaproteobacteria;Myxococcales;JG37-AG-15;JG37-AG-15_unclassified;JG37-AG-15_unclassified;JG37-AG-15_unclassified;
1402	Proteobacteria;Deltaproteobacteria;Myxococcales;JG37-AG-15;JG37-AG-15_unclassified;JG37-AG-15_unclassified;JG37-AG-15_unclassified;.1
1403	Proteobacteria;Deltaproteobacteria;Myxococcales;JG37-AG-15;JG37-AG-15_unclassified;JG37-AG-15_unclassified;JG37-AG-15_unclassified;
1404	Proteobacteria;Deltaproteobacteria;Myxococcales;Myxococcales_unclassified;Myxococcales_unclassified;Myxococcales_unclassified;Myxococcales_unclassified;.18
1405	Proteobacteria;Deltaproteobacteria;Myxococcales;Myxococcales_unclassified;Myxococcales_unclassified;Myxococcales_unclassified;Myxococcales_unclassified;.2
1406	Proteobacteria;Deltaproteobacteria;Myxococcales;Myxococcales_unclassified;Myxococcales_unclassified;Myxococcales_unclassified;Myxococcales_unclassified;.4
1407	Proteobacteria;Deltaproteobacteria;Myxococcales;Myxococcales_unclassified;Myxococcales_unclassified;Myxococcales_unclassified;Myxococcales_unclassified;.7
1408	Proteobacteria;Deltaproteobacteria;Myxococcales;Myxococcales_unclassified;Myxococcales_unclassified;Myxococcales_unclassified;Myxococcales_unclassified;.1
1409	Proteobacteria;Deltaproteobacteria;Myxococcales;Myxococcales_unclassified;Myxococcales_unclassified;Myxococcales_unclassified;Myxococcales_unclassified;
1410	Proteobacteria;Deltaproteobacteria;Myxococcales;Myxococcales_unclassified;Myxococcales_unclassified;Myxococcales_unclassified;Myxococcales_unclassified;
1411	Proteobacteria;Deltaproteobacteria;Myxococcales;Phaselicystidaceae;Phaselicystis;Phaselicystis_unclassified;Phaselicystis_unclassified;
1412	Proteobacteria;Deltaproteobacteria;Myxococcales;Phaselicystidaceae;Phaselicystis;Phaselicystis_unclassified;Phaselicystis_unclassified;.1
1413	Proteobacteria;Deltaproteobacteria;Myxococcales;Polyangiaceae;Sorangium_2;Sorangium_2_unclassified;Sorangium_2_unclassified;
1414	Proteobacteria;Deltaproteobacteria;Myxococcales;Polyangiaceae;Sorangium_2;Sorangium_2_unclassified;Sorangium_2_unclassified;.1
1415	Proteobacteria;Deltaproteobacteria;Myxococcales;Polyangiaceae;Sorangium_2;Sorangium_2_unclassified;Sorangium_2_unclassified;.2
1416	Proteobacteria;Deltaproteobacteria;Myxococcales;Polyangiaceae;Sorangium_2;Sorangium_2_unclassified;Sorangium_2_unclassified;.3
1417	Proteobacteria;Deltaproteobacteria;Myxococcales;Polyangiaceae;Sorangium_2;Sorangium_2_unclassified;Sorangium_2_unclassified;.8
1418	Proteobacteria;Deltaproteobacteria;Myxococcales;Polyangiaceae;Byssovorax;Byssovorax_unclassified;Byssovorax_unclassified;
1419	Proteobacteria;Deltaproteobacteria;Myxococcales;Polyangiaceae;Polyangiaceae_unclassified;Polyangiaceae_unclassified;Polyangiaceae_unclassified;
1420	Proteobacteria;Deltaproteobacteria;Myxococcales;Polyangiaceae;Byssovorax;Byssovorax_unclassified;Byssovorax_unclassified;
1421	Proteobacteria;Deltaproteobacteria;Myxococcales;Polyangiaceae;Byssovorax;Byssovorax_unclassified;Byssovorax_unclassified;
1422	Proteobacteria;Deltaproteobacteria;Myxococcales;Uncultured_3;Uncultured_3_unclassified;Uncultured_3_unclassified;Uncultured_3_unclassified;
1423	Proteobacteria;Deltaproteobacteria;Myxococcales;Uncultured_3;Uncultured_3_unclassified;Uncultured_3_unclassified;Uncultured_3_unclassified;.1
1424	Proteobacteria;Deltaproteobacteria;Myxococcales;Uncultured_3;Uncultured_3_unclassified;Uncultured_3_unclassified;Uncultured_3_unclassified;.2
1425	Proteobacteria;Deltaproteobacteria;Myxococcales;Uncultured_3;Uncultured_3_unclassified;Uncultured_3_unclassified;Uncultured_3_unclassified;.3
1426	Proteobacteria;Deltaproteobacteria;Myxococcales;Uncultured_3;Uncultured_3_unclassified;Uncultured_3_unclassified;Uncultured_3_unclassified;.4
1427	Proteobacteria;Deltaproteobacteria;Myxococcales;Uncultured_3;Uncultured_3_unclassified;Uncultured_3_unclassified;Uncultured_3_unclassified;.6
1428	Proteobacteria;Deltaproteobacteria;Myxococcales;Uncultured_3;Uncultured_3_unclassified;Uncultured_3_unclassified;Uncultured_3_unclassified;
1429	Proteobacteria;Deltaproteobacteria;Myxococcales;Uncultured_5;Uncultured_5_unclassified;Uncultured_5_unclassified;Uncultured_5_unclassified;
1430	Proteobacteria;Deltaproteobacteria;Rs-K70;Insect_cluster;Insect_cluster_unclassified;Insect_cluster_unclassified;Insect_cluster_unclassified;
1431	Proteobacteria;Deltaproteobacteria;Rs-K70;Insect_cluster;Insect_cluster_unclassified;Insect_cluster_unclassified;Insect_cluster_unclassified;
1432	Proteobacteria;Deltaproteobacteria;Sh765B-TzT-29;Sh765B-TzT-29_unclassified;Sh765B-TzT-29_unclassified;Sh765B-TzT-29_unclassified;Sh765B-TzT-29_unclassified;
1433	Proteobacteria;Deltaproteobacteria;Sh765B-TzT-29;Sh765B-TzT-29_unclassified;Sh765B-TzT-29_unclassified;Sh765B-TzT-29_unclassified;Sh765B-TzT-29_unclassified;.1
1434	Proteobacteria;Deltaproteobacteria;Sh765B-TzT-29;Sh765B-TzT-29_unclassified;Sh765B-TzT-29_unclassified;Sh765B-TzT-29_unclassified;Sh765B-TzT-29_unclassified;.2
1435	Proteobacteria;Deltaproteobacteria;Sh765B-TzT-29;Sh765B-TzT-29_unclassified;Sh765B-TzT-29_unclassified;Sh765B-TzT-29_unclassified;Sh765B-TzT-29_unclassified;.3
1436	Proteobacteria;Deltaproteobacteria;Sh765B-TzT-29;Sh765B-TzT-29_unclassified;Sh765B-TzT-29_unclassified;Sh765B-TzT-29_unclassified;Sh765B-TzT-29_unclassified;.4
1437	Proteobacteria;Deltaproteobacteria;Sh765B-TzT-29;Sh765B-TzT-29_unclassified;Sh765B-TzT-29_unclassified;Sh765B-TzT-29_unclassified;Sh765B-TzT-29_unclassified;.7
1438	Proteobacteria;Deltaproteobacteria;Syntrophobacterales;Syntrophorhabdaceae;Syntrophorhabdus;Syntrophorhabdus_unclassified;Syntrophorhabdus_unclassified;
1439	Proteobacteria;Epsilonproteobacteria;Campylobacterales;Campylobacteraceae;Sulfurospirillum;Sulfurospirillum_unclassified;Sulfurospirillum_unclassified;
1440	Proteobacteria;Gammaproteobacteria_1;Alteromonadales;Alteromonadaceae;BD1-7_clade;BD1-7_clade_unclassified;BD1-7_clade_unclassified;
1441	Proteobacteria;Gammaproteobacteria_1;Alteromonadales;Alteromonadaceae;OM60_NOR5__clade;Haliea_1;Haliea_1_unclassified;
1442	Proteobacteria;Gammaproteobacteria_1;Enterobacteriales;Enterobacteriaceae_1;Morganella;Morganella_unclassified;Morganella_unclassified;
1443	Proteobacteria;Gammaproteobacteria_1;Enterobacteriales;Enterobacteriaceae_1;Proteus;Proteus_unclassified;Proteus_unclassified;
1444	Proteobacteria;Gammaproteobacteria_1;Enterobacteriales;Enterobacteriaceae_1;Providencia;Providencia_unclassified;Providencia_unclassified;
1445	Proteobacteria;Gammaproteobacteria_1;Enterobacteriales;Enterobacteriaceae;Enterobacteriaceae_unclassified;Enterobacteriaceae_unclassified;Enterobacteriaceae_unclassified;
1446	Proteobacteria;Gammaproteobacteria_1;Gammaproteobacteria_1_unclassified;Gammaproteobacteria_1_unclassified;Gammaproteobacteria_1_unclassified;Gammaproteobacteria_1_unclassified;Gammaproteobacteria_1_unclassified;.2
1447	Proteobacteria;Gammaproteobacteria_1;Oceanospirillales;Alcanivoracaceae;Alcanivorax;Alcanivorax_unclassified;Alcanivorax_unclassified;.1
1448	Proteobacteria;Gammaproteobacteria_1;Pseudomonadales;Moraxellaceae;Acinetobacter;Acinetobacter_unclassified;Acinetobacter_unclassified;.1
1449	Proteobacteria;Gammaproteobacteria_1;Pseudomonadales;Pseudomonadaceae;Pseudomonadaceae_unclassified;Pseudomonadaceae_unclassified;Pseudomonadaceae_unclassified;.1
1450	Proteobacteria;Gammaproteobacteria_2;Gammaproteobacteria_2_unclassified;Gammaproteobacteria_2_unclassified;Gammaproteobacteria_2_unclassified;Gammaproteobacteria_2_unclassified;Gammaproteobacteria_2_unclassified;
1451	Proteobacteria;Gammaproteobacteria_2;Gammaproteobacteria_2_unclassified;Gammaproteobacteria_2_unclassified;Gammaproteobacteria_2_unclassified;Gammaproteobacteria_2_unclassified;Gammaproteobacteria_2_unclassified;.1
1452	Proteobacteria;Gammaproteobacteria_2;Gammaproteobacteria_2_unclassified;Gammaproteobacteria_2_unclassified;Gammaproteobacteria_2_unclassified;Gammaproteobacteria_2_unclassified;Gammaproteobacteria_2_unclassified;.19
1453	Proteobacteria;Gammaproteobacteria_2;Gammaproteobacteria_2_unclassified;Gammaproteobacteria_2_unclassified;Gammaproteobacteria_2_unclassified;Gammaproteobacteria_2_unclassified;Gammaproteobacteria_2_unclassified;.3
1454	Proteobacteria;Gammaproteobacteria_2;Gammaproteobacteria_2_unclassified;Gammaproteobacteria_2_unclassified;Gammaproteobacteria_2_unclassified;Gammaproteobacteria_2_unclassified;Gammaproteobacteria_2_unclassified;.4
1455	Proteobacteria;Gammaproteobacteria_2;Gammaproteobacteria_2_unclassified;Gammaproteobacteria_2_unclassified;Gammaproteobacteria_2_unclassified;Gammaproteobacteria_2_unclassified;Gammaproteobacteria_2_unclassified;.5
1456	Proteobacteria;Gammaproteobacteria_2;Gammaproteobacteria_2_unclassified;Gammaproteobacteria_2_unclassified;Gammaproteobacteria_2_unclassified;Gammaproteobacteria_2_unclassified;Gammaproteobacteria_2_unclassified;.6
1457	Proteobacteria;Gammaproteobacteria_2;Legionellales;Coxiellaceae;Aquicella;Aquicella_unclassified;Aquicella_unclassified;.17
1458	Proteobacteria;Gammaproteobacteria_2;Xanthomonadales;Sinobacteraceae;Sinobacteraceae_unclassified;Sinobacteraceae_unclassified;Sinobacteraceae_unclassified;
1459	Proteobacteria;Gammaproteobacteria_2;Xanthomonadales;Sinobacteraceae;Sinobacteraceae_unclassified;Sinobacteraceae_unclassified;Sinobacteraceae_unclassified;.1
1460	Proteobacteria;Gammaproteobacteria_2;Xanthomonadales;Sinobacteraceae;Sinobacteraceae_unclassified;Sinobacteraceae_unclassified;Sinobacteraceae_unclassified;.2
1461	Proteobacteria;Gammaproteobacteria_2;Xanthomonadales;Sinobacteraceae;Sinobacteraceae_unclassified;Sinobacteraceae_unclassified;Sinobacteraceae_unclassified;
1462	Proteobacteria;Gammaproteobacteria_2;Xanthomonadales;Sinobacteraceae;Steroidobacter;Steroidobacter_unclassified;Steroidobacter_unclassified;
1463	Proteobacteria;Gammaproteobacteria_2;Xanthomonadales;Sinobacteraceae;Uncultured_4;Uncultured_4_unclassified;Uncultured_4_unclassified;
1464	Proteobacteria;Gammaproteobacteria_2;Xanthomonadales;Sinobacteraceae;Uncultured_6;Uncultured_6_unclassified;Uncultured_6_unclassified;
1465	Proteobacteria;Gammaproteobacteria_2;Xanthomonadales;Sinobacteraceae;Uncultured_6;Uncultured_6_unclassified;Uncultured_6_unclassified;.1
1466	Proteobacteria;Gammaproteobacteria_2;Xanthomonadales;Sinobacteraceae;Uncultured_6;Uncultured_6_unclassified;Uncultured_6_unclassified;.2
1467	Proteobacteria;Gammaproteobacteria_2;Xanthomonadales;Sinobacteraceae;Uncultured_6;Uncultured_6_unclassified;Uncultured_6_unclassified;.3
1468	Proteobacteria;Gammaproteobacteria_2;Xanthomonadales;Sinobacteraceae;Uncultured_6;Uncultured_6_unclassified;Uncultured_6_unclassified;.4
1469	Proteobacteria;Gammaproteobacteria_2;Xanthomonadales;Sinobacteraceae;Uncultured_6;Uncultured_6_unclassified;Uncultured_6_unclassified;.5
1470	Proteobacteria;Gammaproteobacteria_2;Xanthomonadales;Sinobacteraceae;Uncultured_6;Uncultured_6_unclassified;Uncultured_6_unclassified;.6
1471	Proteobacteria;Gammaproteobacteria_2;Xanthomonadales;Sinobacteraceae;Uncultured_6;Uncultured_6_unclassified;Uncultured_6_unclassified;.7
1472	Proteobacteria;Gammaproteobacteria_2;Xanthomonadales;Sinobacteraceae;Uncultured_6;Uncultured_6_unclassified;Uncultured_6_unclassified;.9
1473	Proteobacteria;Gammaproteobacteria_2;Xanthomonadales;Sinobacteraceae;Uncultured_6;Uncultured_6_unclassified;Uncultured_6_unclassified;
1474	Proteobacteria;Gammaproteobacteria_2;Xanthomonadales;Sinobacteraceae;Uncultured_8;Uncultured_8_unclassified;Uncultured_8_unclassified;
1475	Proteobacteria;Gammaproteobacteria;Xanthomonadales;Xanthomonadaceae;Arenimonas_1;Arenimonas_1_unclassified;Arenimonas_1_unclassified;
1476	Proteobacteria;Gammaproteobacteria;Xanthomonadales;Xanthomonadaceae;Uncultured_3;Uncultured_3_unclassified;Uncultured_3_unclassified;
1477	Proteobacteria;Gammaproteobacteria;Xanthomonadales;Xanthomonadaceae;Xanthomonadaceae_unclassified;Xanthomonadaceae_unclassified;Xanthomonadaceae_unclassified;
1478	Proteobacteria;Proteobacteria_unclassified;Proteobacteria_unclassified;Proteobacteria_unclassified;Proteobacteria_unclassified;Proteobacteria_unclassified;Proteobacteria_unclassified;.110
1479	Proteobacteria;Proteobacteria_unclassified;Proteobacteria_unclassified;Proteobacteria_unclassified;Proteobacteria_unclassified;Proteobacteria_unclassified;Proteobacteria_unclassified;.112
1480	Proteobacteria;Proteobacteria_unclassified;Proteobacteria_unclassified;Proteobacteria_unclassified;Proteobacteria_unclassified;Proteobacteria_unclassified;Proteobacteria_unclassified;.119
1481	Proteobacteria;Proteobacteria_unclassified;Proteobacteria_unclassified;Proteobacteria_unclassified;Proteobacteria_unclassified;Proteobacteria_unclassified;Proteobacteria_unclassified;.12
1482	Proteobacteria;Proteobacteria_unclassified;Proteobacteria_unclassified;Proteobacteria_unclassified;Proteobacteria_unclassified;Proteobacteria_unclassified;Proteobacteria_unclassified;.136
1483	Proteobacteria;Proteobacteria_unclassified;Proteobacteria_unclassified;Proteobacteria_unclassified;Proteobacteria_unclassified;Proteobacteria_unclassified;Proteobacteria_unclassified;.16
1484	Proteobacteria;Proteobacteria_unclassified;Proteobacteria_unclassified;Proteobacteria_unclassified;Proteobacteria_unclassified;Proteobacteria_unclassified;Proteobacteria_unclassified;.187
1485	Proteobacteria;Proteobacteria_unclassified;Proteobacteria_unclassified;Proteobacteria_unclassified;Proteobacteria_unclassified;Proteobacteria_unclassified;Proteobacteria_unclassified;.195
1486	Proteobacteria;Proteobacteria_unclassified;Proteobacteria_unclassified;Proteobacteria_unclassified;Proteobacteria_unclassified;Proteobacteria_unclassified;Proteobacteria_unclassified;.2
1487	Proteobacteria;Proteobacteria_unclassified;Proteobacteria_unclassified;Proteobacteria_unclassified;Proteobacteria_unclassified;Proteobacteria_unclassified;Proteobacteria_unclassified;.206
1488	Proteobacteria;Proteobacteria_unclassified;Proteobacteria_unclassified;Proteobacteria_unclassified;Proteobacteria_unclassified;Proteobacteria_unclassified;Proteobacteria_unclassified;.22
1489	Proteobacteria;Proteobacteria_unclassified;Proteobacteria_unclassified;Proteobacteria_unclassified;Proteobacteria_unclassified;Proteobacteria_unclassified;Proteobacteria_unclassified;.23
1490	Proteobacteria;Proteobacteria_unclassified;Proteobacteria_unclassified;Proteobacteria_unclassified;Proteobacteria_unclassified;Proteobacteria_unclassified;Proteobacteria_unclassified;.40
1491	Proteobacteria;Proteobacteria_unclassified;Proteobacteria_unclassified;Proteobacteria_unclassified;Proteobacteria_unclassified;Proteobacteria_unclassified;Proteobacteria_unclassified;.42
1492	Proteobacteria;Proteobacteria_unclassified;Proteobacteria_unclassified;Proteobacteria_unclassified;Proteobacteria_unclassified;Proteobacteria_unclassified;Proteobacteria_unclassified;.46
1493	Proteobacteria;Proteobacteria_unclassified;Proteobacteria_unclassified;Proteobacteria_unclassified;Proteobacteria_unclassified;Proteobacteria_unclassified;Proteobacteria_unclassified;.47
1494	Proteobacteria;Proteobacteria_unclassified;Proteobacteria_unclassified;Proteobacteria_unclassified;Proteobacteria_unclassified;Proteobacteria_unclassified;Proteobacteria_unclassified;.49
1495	Proteobacteria;Proteobacteria_unclassified;Proteobacteria_unclassified;Proteobacteria_unclassified;Proteobacteria_unclassified;Proteobacteria_unclassified;Proteobacteria_unclassified;.54
1496	Proteobacteria;Proteobacteria_unclassified;Proteobacteria_unclassified;Proteobacteria_unclassified;Proteobacteria_unclassified;Proteobacteria_unclassified;Proteobacteria_unclassified;.56
1497	Proteobacteria;Proteobacteria_unclassified;Proteobacteria_unclassified;Proteobacteria_unclassified;Proteobacteria_unclassified;Proteobacteria_unclassified;Proteobacteria_unclassified;.59
1498	Proteobacteria;Proteobacteria_unclassified;Proteobacteria_unclassified;Proteobacteria_unclassified;Proteobacteria_unclassified;Proteobacteria_unclassified;Proteobacteria_unclassified;.72
1499	Proteobacteria;Proteobacteria_unclassified;Proteobacteria_unclassified;Proteobacteria_unclassified;Proteobacteria_unclassified;Proteobacteria_unclassified;Proteobacteria_unclassified;.77
1500	Proteobacteria;Proteobacteria_unclassified;Proteobacteria_unclassified;Proteobacteria_unclassified;Proteobacteria_unclassified;Proteobacteria_unclassified;Proteobacteria_unclassified;.78
1501	SM2F11;SM2F11_unclassified;SM2F11_unclassified;SM2F11_unclassified;SM2F11_unclassified;SM2F11_unclassified;SM2F11_unclassified;
1502	SM2F11;SM2F11_unclassified;SM2F11_unclassified;SM2F11_unclassified;SM2F11_unclassified;SM2F11_unclassified;SM2F11_unclassified;.1
1503	SM2F11;SM2F11_unclassified;SM2F11_unclassified;SM2F11_unclassified;SM2F11_unclassified;SM2F11_unclassified;SM2F11_unclassified;.20
1504	SM2F11;SM2F11_unclassified;SM2F11_unclassified;SM2F11_unclassified;SM2F11_unclassified;SM2F11_unclassified;SM2F11_unclassified;.3
1505	SM2F11;SM2F11_unclassified;SM2F11_unclassified;SM2F11_unclassified;SM2F11_unclassified;SM2F11_unclassified;SM2F11_unclassified;.9
1506	Spirochaetes;Spirochaetes;Spirochaetales;Leptospiraceae;Leptospira;Leptospira_unclassified;Leptospira_unclassified;
1507	Spirochaetes;Spirochaetes;Spirochaetales;Leptospiraceae;Rs-H88_termite_group;Rs-H88_termite_group_unclassified;Rs-H88_termite_group_unclassified;
1508	Spirochaetes;Spirochaetes;Spirochaetales;Leptospiraceae;Uncultured_1;Uncultured_1_unclassified;Uncultured_1_unclassified;
1509	Spirochaetes;Spirochaetes;Spirochaetales;Spirochaetaceae_Treponema_I;Spirochaetaceae_Treponema_I_unclassified;Spirochaetaceae_Treponema_I_unclassified;Spirochaetaceae_Treponema_I_unclassified;
1510	Spirochaetes;Spirochaetes;Spirochaetales;Spirochaetaceae_Treponema;Animal_cluster_1;Animal_cluster_1_unclassified;Animal_cluster_1_unclassified;
1511	Spirochaetes;Spirochaetes;Spirochaetales;Spirochaetaceae;Spirochaeta;Spirochaeta_unclassified;Spirochaeta_unclassified;
1512	Spirochaetes;Spirochaetes;Spirochaetales;Spirochaetales_unclassified;Spirochaetales_unclassified;Spirochaetales_unclassified;Spirochaetales_unclassified;
1513	Synergistetes;Synergistia;Synergistales;Synergistaceae;Candidatus_Tammella;Candidatus_Tammella_unclassified;Candidatus_Tammella_unclassified;.1
1514	Synergistetes;Synergistia;Synergistales;Synergistaceae;Candidatus_Tammella;Candidatus_Tammella_unclassified;Candidatus_Tammella_unclassified;.2
1515	Synergistetes;Synergistia;Synergistales;Synergistaceae;Candidatus_Tammella;Candidatus_Tammella_unclassified;Candidatus_Tammella_unclassified;.4
1516	Synergistetes;Synergistia;Synergistales;Synergistaceae;Candidatus_Tammella;Candidatus_Tammella_unclassified;Candidatus_Tammella_unclassified;.9
1517	Synergistetes;Synergistia;Synergistales;Synergistaceae;Synergistaceae_unclassified;Synergistaceae_unclassified;Synergistaceae_unclassified;.5
1518	Synergistetes;Synergistia;Synergistales;Synergistaceae;Synergistaceae_unclassified;Synergistaceae_unclassified;Synergistaceae_unclassified;.9
1519	Synergistetes;Synergistia;Synergistales;Synergistaceae;Synergistaceae_unclassified;Synergistaceae_unclassified;Synergistaceae_unclassified;
1520	Synergistetes;Synergistia;Synergistales;Synergistaceae;Synergistaceae_unclassified;Synergistaceae_unclassified;Synergistaceae_unclassified;
1521	Synergistetes;Synergistia;Synergistales;Synergistaceae;Termite_cockroach_cluster;Termite_cockroach_cluster_unclassified;Termite_cockroach_cluster_unclassified;
1522	TA06;TA06_unclassified;TA06_unclassified;TA06_unclassified;TA06_unclassified;TA06_unclassified;TA06_unclassified;
1523	Tenericutes;Mollicutes;Acholeplasmatales;Acholeplasmataceae;Acholeplasma_2;Acholeplasma_2_unclassified;Acholeplasma_2_unclassified;
1524	Tenericutes;Mollicutes;Acholeplasmatales;Acholeplasmataceae;Acholeplasma_2;Acholeplasma_2_unclassified;Acholeplasma_2_unclassified;.5
1525	Tenericutes;Mollicutes;Acholeplasmatales;Acholeplasmataceae;Acholeplasma_2;Acholeplasma_2_unclassified;Acholeplasma_2_unclassified;
1526	Tenericutes;Mollicutes;Acholeplasmatales;Acholeplasmataceae;Acholeplasma_2;Acholeplasma_2_unclassified;Acholeplasma_2_unclassified;
1527	Tenericutes;Mollicutes;Mycoplasmatales;Mycoplasmataceae;Uncultured_1;Uncultured_1_unclassified;Uncultured_1_unclassified;.3
1528	Tenericutes;Mollicutes;RF9;RF9_unclassified;RF9_unclassified;RF9_unclassified;RF9_unclassified;.3
1529	Tenericutes;Mollicutes;RF9;RF9_unclassified;RF9_unclassified;RF9_unclassified;RF9_unclassified;.43
1530	Verrucomicrobia;OPB35_soil_group;OPB35_soil_group_unclassified;OPB35_soil_group_unclassified;OPB35_soil_group_unclassified;OPB35_soil_group_unclassified;OPB35_soil_group_unclassified;
1531	Verrucomicrobia;OPB35_soil_group;OPB35_soil_group_unclassified;OPB35_soil_group_unclassified;OPB35_soil_group_unclassified;OPB35_soil_group_unclassified;OPB35_soil_group_unclassified;.1
1532	Verrucomicrobia;OPB35_soil_group;OPB35_soil_group_unclassified;OPB35_soil_group_unclassified;OPB35_soil_group_unclassified;OPB35_soil_group_unclassified;OPB35_soil_group_unclassified;.10
1533	Verrucomicrobia;OPB35_soil_group;OPB35_soil_group_unclassified;OPB35_soil_group_unclassified;OPB35_soil_group_unclassified;OPB35_soil_group_unclassified;OPB35_soil_group_unclassified;.101
1534	Verrucomicrobia;OPB35_soil_group;OPB35_soil_group_unclassified;OPB35_soil_group_unclassified;OPB35_soil_group_unclassified;OPB35_soil_group_unclassified;OPB35_soil_group_unclassified;.104
1535	Verrucomicrobia;OPB35_soil_group;OPB35_soil_group_unclassified;OPB35_soil_group_unclassified;OPB35_soil_group_unclassified;OPB35_soil_group_unclassified;OPB35_soil_group_unclassified;.107
1536	Verrucomicrobia;OPB35_soil_group;OPB35_soil_group_unclassified;OPB35_soil_group_unclassified;OPB35_soil_group_unclassified;OPB35_soil_group_unclassified;OPB35_soil_group_unclassified;.11
1537	Verrucomicrobia;OPB35_soil_group;OPB35_soil_group_unclassified;OPB35_soil_group_unclassified;OPB35_soil_group_unclassified;OPB35_soil_group_unclassified;OPB35_soil_group_unclassified;.12
1538	Verrucomicrobia;OPB35_soil_group;OPB35_soil_group_unclassified;OPB35_soil_group_unclassified;OPB35_soil_group_unclassified;OPB35_soil_group_unclassified;OPB35_soil_group_unclassified;.129
1539	Verrucomicrobia;OPB35_soil_group;OPB35_soil_group_unclassified;OPB35_soil_group_unclassified;OPB35_soil_group_unclassified;OPB35_soil_group_unclassified;OPB35_soil_group_unclassified;.13
1540	Verrucomicrobia;OPB35_soil_group;OPB35_soil_group_unclassified;OPB35_soil_group_unclassified;OPB35_soil_group_unclassified;OPB35_soil_group_unclassified;OPB35_soil_group_unclassified;.14
1541	Verrucomicrobia;OPB35_soil_group;OPB35_soil_group_unclassified;OPB35_soil_group_unclassified;OPB35_soil_group_unclassified;OPB35_soil_group_unclassified;OPB35_soil_group_unclassified;.15
1542	Verrucomicrobia;OPB35_soil_group;OPB35_soil_group_unclassified;OPB35_soil_group_unclassified;OPB35_soil_group_unclassified;OPB35_soil_group_unclassified;OPB35_soil_group_unclassified;.16
1543	Verrucomicrobia;OPB35_soil_group;OPB35_soil_group_unclassified;OPB35_soil_group_unclassified;OPB35_soil_group_unclassified;OPB35_soil_group_unclassified;OPB35_soil_group_unclassified;.179
1544	Verrucomicrobia;OPB35_soil_group;OPB35_soil_group_unclassified;OPB35_soil_group_unclassified;OPB35_soil_group_unclassified;OPB35_soil_group_unclassified;OPB35_soil_group_unclassified;.18
1545	Verrucomicrobia;OPB35_soil_group;OPB35_soil_group_unclassified;OPB35_soil_group_unclassified;OPB35_soil_group_unclassified;OPB35_soil_group_unclassified;OPB35_soil_group_unclassified;.188
1546	Verrucomicrobia;OPB35_soil_group;OPB35_soil_group_unclassified;OPB35_soil_group_unclassified;OPB35_soil_group_unclassified;OPB35_soil_group_unclassified;OPB35_soil_group_unclassified;.19
1547	Verrucomicrobia;OPB35_soil_group;OPB35_soil_group_unclassified;OPB35_soil_group_unclassified;OPB35_soil_group_unclassified;OPB35_soil_group_unclassified;OPB35_soil_group_unclassified;.2
1548	Verrucomicrobia;OPB35_soil_group;OPB35_soil_group_unclassified;OPB35_soil_group_unclassified;OPB35_soil_group_unclassified;OPB35_soil_group_unclassified;OPB35_soil_group_unclassified;.21
1549	Verrucomicrobia;OPB35_soil_group;OPB35_soil_group_unclassified;OPB35_soil_group_unclassified;OPB35_soil_group_unclassified;OPB35_soil_group_unclassified;OPB35_soil_group_unclassified;.22
1550	Verrucomicrobia;OPB35_soil_group;OPB35_soil_group_unclassified;OPB35_soil_group_unclassified;OPB35_soil_group_unclassified;OPB35_soil_group_unclassified;OPB35_soil_group_unclassified;.23
1551	Verrucomicrobia;OPB35_soil_group;OPB35_soil_group_unclassified;OPB35_soil_group_unclassified;OPB35_soil_group_unclassified;OPB35_soil_group_unclassified;OPB35_soil_group_unclassified;.24
1552	Verrucomicrobia;OPB35_soil_group;OPB35_soil_group_unclassified;OPB35_soil_group_unclassified;OPB35_soil_group_unclassified;OPB35_soil_group_unclassified;OPB35_soil_group_unclassified;.25
1553	Verrucomicrobia;OPB35_soil_group;OPB35_soil_group_unclassified;OPB35_soil_group_unclassified;OPB35_soil_group_unclassified;OPB35_soil_group_unclassified;OPB35_soil_group_unclassified;.28
1554	Verrucomicrobia;OPB35_soil_group;OPB35_soil_group_unclassified;OPB35_soil_group_unclassified;OPB35_soil_group_unclassified;OPB35_soil_group_unclassified;OPB35_soil_group_unclassified;.29
1555	Verrucomicrobia;OPB35_soil_group;OPB35_soil_group_unclassified;OPB35_soil_group_unclassified;OPB35_soil_group_unclassified;OPB35_soil_group_unclassified;OPB35_soil_group_unclassified;.3
1556	Verrucomicrobia;OPB35_soil_group;OPB35_soil_group_unclassified;OPB35_soil_group_unclassified;OPB35_soil_group_unclassified;OPB35_soil_group_unclassified;OPB35_soil_group_unclassified;.30
1557	Verrucomicrobia;OPB35_soil_group;OPB35_soil_group_unclassified;OPB35_soil_group_unclassified;OPB35_soil_group_unclassified;OPB35_soil_group_unclassified;OPB35_soil_group_unclassified;.31
1558	Verrucomicrobia;OPB35_soil_group;OPB35_soil_group_unclassified;OPB35_soil_group_unclassified;OPB35_soil_group_unclassified;OPB35_soil_group_unclassified;OPB35_soil_group_unclassified;.34
1559	Verrucomicrobia;OPB35_soil_group;OPB35_soil_group_unclassified;OPB35_soil_group_unclassified;OPB35_soil_group_unclassified;OPB35_soil_group_unclassified;OPB35_soil_group_unclassified;.351
1560	Verrucomicrobia;OPB35_soil_group;OPB35_soil_group_unclassified;OPB35_soil_group_unclassified;OPB35_soil_group_unclassified;OPB35_soil_group_unclassified;OPB35_soil_group_unclassified;.37
1561	Verrucomicrobia;OPB35_soil_group;OPB35_soil_group_unclassified;OPB35_soil_group_unclassified;OPB35_soil_group_unclassified;OPB35_soil_group_unclassified;OPB35_soil_group_unclassified;.4
1562	Verrucomicrobia;OPB35_soil_group;OPB35_soil_group_unclassified;OPB35_soil_group_unclassified;OPB35_soil_group_unclassified;OPB35_soil_group_unclassified;OPB35_soil_group_unclassified;.43
1563	Verrucomicrobia;OPB35_soil_group;OPB35_soil_group_unclassified;OPB35_soil_group_unclassified;OPB35_soil_group_unclassified;OPB35_soil_group_unclassified;OPB35_soil_group_unclassified;.45
1564	Verrucomicrobia;OPB35_soil_group;OPB35_soil_group_unclassified;OPB35_soil_group_unclassified;OPB35_soil_group_unclassified;OPB35_soil_group_unclassified;OPB35_soil_group_unclassified;.49
1565	Verrucomicrobia;OPB35_soil_group;OPB35_soil_group_unclassified;OPB35_soil_group_unclassified;OPB35_soil_group_unclassified;OPB35_soil_group_unclassified;OPB35_soil_group_unclassified;.5
1566	Verrucomicrobia;OPB35_soil_group;OPB35_soil_group_unclassified;OPB35_soil_group_unclassified;OPB35_soil_group_unclassified;OPB35_soil_group_unclassified;OPB35_soil_group_unclassified;.54
1567	Verrucomicrobia;OPB35_soil_group;OPB35_soil_group_unclassified;OPB35_soil_group_unclassified;OPB35_soil_group_unclassified;OPB35_soil_group_unclassified;OPB35_soil_group_unclassified;.58
1568	Verrucomicrobia;OPB35_soil_group;OPB35_soil_group_unclassified;OPB35_soil_group_unclassified;OPB35_soil_group_unclassified;OPB35_soil_group_unclassified;OPB35_soil_group_unclassified;.6
1569	Verrucomicrobia;OPB35_soil_group;OPB35_soil_group_unclassified;OPB35_soil_group_unclassified;OPB35_soil_group_unclassified;OPB35_soil_group_unclassified;OPB35_soil_group_unclassified;.64
1570	Verrucomicrobia;OPB35_soil_group;OPB35_soil_group_unclassified;OPB35_soil_group_unclassified;OPB35_soil_group_unclassified;OPB35_soil_group_unclassified;OPB35_soil_group_unclassified;.7
1571	Verrucomicrobia;OPB35_soil_group;OPB35_soil_group_unclassified;OPB35_soil_group_unclassified;OPB35_soil_group_unclassified;OPB35_soil_group_unclassified;OPB35_soil_group_unclassified;.72
1572	Verrucomicrobia;OPB35_soil_group;OPB35_soil_group_unclassified;OPB35_soil_group_unclassified;OPB35_soil_group_unclassified;OPB35_soil_group_unclassified;OPB35_soil_group_unclassified;.79
1573	Verrucomicrobia;OPB35_soil_group;OPB35_soil_group_unclassified;OPB35_soil_group_unclassified;OPB35_soil_group_unclassified;OPB35_soil_group_unclassified;OPB35_soil_group_unclassified;.8
1574	Verrucomicrobia;OPB35_soil_group;OPB35_soil_group_unclassified;OPB35_soil_group_unclassified;OPB35_soil_group_unclassified;OPB35_soil_group_unclassified;OPB35_soil_group_unclassified;.80
1575	Verrucomicrobia;OPB35_soil_group;OPB35_soil_group_unclassified;OPB35_soil_group_unclassified;OPB35_soil_group_unclassified;OPB35_soil_group_unclassified;OPB35_soil_group_unclassified;.9
1576	Verrucomicrobia;Opitutae;Opitutales;Opitutaceae;Opitutus;Opitutus_unclassified;Opitutus_unclassified;.1
1577	Verrucomicrobia;Opitutae;Opitutales;Opitutaceae;Opitutus;Opitutus_unclassified;Opitutus_unclassified;.2
1578	Verrucomicrobia;Opitutae;Opitutales;Opitutaceae;Opitutus;Opitutus_unclassified;Opitutus_unclassified;.3
1579	Verrucomicrobia;Opitutae;Opitutales;Opitutaceae;Opitutus;Opitutus_unclassified;Opitutus_unclassified;.4
1580	Verrucomicrobia;Opitutae;Opitutales;Opitutaceae;Opitutus;Opitutus_unclassified;Opitutus_unclassified;.6
1581	Verrucomicrobia;Opitutae;Opitutales;Opitutaceae;Opitutus;Opitutus_unclassified;Opitutus_unclassified;.8
1582	Verrucomicrobia;Opitutae;Puniceicoccales;Puniceicoccaceae;Puniceicoccaceae_unclassified;Puniceicoccaceae_unclassified;Puniceicoccaceae_unclassified;
1583	Verrucomicrobia;S-BQ2-57_soil_group;S-BQ2-57_soil_group_unclassified;S-BQ2-57_soil_group_unclassified;S-BQ2-57_soil_group_unclassified;S-BQ2-57_soil_group_unclassified;S-BQ2-57_soil_group_unclassified;
1584	Verrucomicrobia;S-BQ2-57_soil_group;S-BQ2-57_soil_group_unclassified;S-BQ2-57_soil_group_unclassified;S-BQ2-57_soil_group_unclassified;S-BQ2-57_soil_group_unclassified;S-BQ2-57_soil_group_unclassified;.1
1585	Verrucomicrobia;S-BQ2-57_soil_group;S-BQ2-57_soil_group_unclassified;S-BQ2-57_soil_group_unclassified;S-BQ2-57_soil_group_unclassified;S-BQ2-57_soil_group_unclassified;S-BQ2-57_soil_group_unclassified;.11
1586	Verrucomicrobia;Spartobacteria;Chthoniobacter;Chthoniobacter_unclassified;Chthoniobacter_unclassified;Chthoniobacter_unclassified;Chthoniobacter_unclassified;
1587	Verrucomicrobia;Spartobacteria;Chthoniobacter;Chthoniobacter_unclassified;Chthoniobacter_unclassified;Chthoniobacter_unclassified;Chthoniobacter_unclassified;.1
1588	Verrucomicrobia;Spartobacteria;Chthoniobacter;Chthoniobacter_unclassified;Chthoniobacter_unclassified;Chthoniobacter_unclassified;Chthoniobacter_unclassified;.2
1589	Verrucomicrobia;Spartobacteria;Chthoniobacter;Chthoniobacter_unclassified;Chthoniobacter_unclassified;Chthoniobacter_unclassified;Chthoniobacter_unclassified;.6
1590	Verrucomicrobia;Spartobacteria;Chthoniobacter;Chthoniobacter_unclassified;Chthoniobacter_unclassified;Chthoniobacter_unclassified;Chthoniobacter_unclassified;.7
1591	Verrucomicrobia;Spartobacteria;Chthoniobacterales;Xiphinematobacteraceae;Candidatus_Xiphinematobacter;Candidatus_Xiphinematobacter_unclassified;Candidatus_Xiphinematobacter_unclassified;
1592	Verrucomicrobia;Spartobacteria;Chthoniobacterales;Xiphinematobacteraceae;Candidatus_Xiphinematobacter;Candidatus_Xiphinematobacter_unclassified;Candidatus_Xiphinematobacter_unclassified;.1
1593	Verrucomicrobia;Spartobacteria;Chthoniobacterales;Xiphinematobacteraceae;Candidatus_Xiphinematobacter;Candidatus_Xiphinematobacter_unclassified;Candidatus_Xiphinematobacter_unclassified;.2
1594	Verrucomicrobia;Spartobacteria;DA101_soil_group;DA101_soil_group_unclassified;DA101_soil_group_unclassified;DA101_soil_group_unclassified;DA101_soil_group_unclassified;
1595	Verrucomicrobia;Spartobacteria;DA101_soil_group;DA101_soil_group_unclassified;DA101_soil_group_unclassified;DA101_soil_group_unclassified;DA101_soil_group_unclassified;.1
1596	Verrucomicrobia;Spartobacteria;DA101_soil_group;DA101_soil_group_unclassified;DA101_soil_group_unclassified;DA101_soil_group_unclassified;DA101_soil_group_unclassified;.2
1597	Verrucomicrobia;Spartobacteria;DA101_soil_group;DA101_soil_group_unclassified;DA101_soil_group_unclassified;DA101_soil_group_unclassified;DA101_soil_group_unclassified;.3
1598	Verrucomicrobia;Spartobacteria;DA101_soil_group;DA101_soil_group_unclassified;DA101_soil_group_unclassified;DA101_soil_group_unclassified;DA101_soil_group_unclassified;.4
1599	Verrucomicrobia;Spartobacteria;DA101_soil_group;DA101_soil_group_unclassified;DA101_soil_group_unclassified;DA101_soil_group_unclassified;DA101_soil_group_unclassified;.5
1600	Verrucomicrobia;Spartobacteria;DA101_soil_group;DA101_soil_group_unclassified;DA101_soil_group_unclassified;DA101_soil_group_unclassified;DA101_soil_group_unclassified;.9
1601	Verrucomicrobia;Verrucomicrobia_unclassified;Verrucomicrobia_unclassified;Verrucomicrobia_unclassified;Verrucomicrobia_unclassified;Verrucomicrobia_unclassified;Verrucomicrobia_unclassified;.5
1602	Verrucomicrobia;Verrucomicrobia_unclassified;Verrucomicrobia_unclassified;Verrucomicrobia_unclassified;Verrucomicrobia_unclassified;Verrucomicrobia_unclassified;Verrucomicrobia_unclassified;.7
1603	Verrucomicrobia;Verrucomicrobiae;Verrucomicrobiales;Verrucomicrobiaceae_2;Uncultured_2;Uncultured_2_unclassified;Uncultured_2_unclassified;
1604	Verrucomicrobia;Verrucomicrobiae;Verrucomicrobiales;Verrucomicrobiaceae_2;Verrucomicrobiaceae_2_unclassified;Verrucomicrobiaceae_2_unclassified;Verrucomicrobiaceae_2_unclassified;
1605	Verrucomicrobia;Verrucomicrobiae;Verrucomicrobiales;Verrucomicrobiaceae_2;Verrucomicrobiaceae_2_unclassified;Verrucomicrobiaceae_2_unclassified;Verrucomicrobiaceae_2_unclassified;
1606	WCHB1-60;WCHB1-60_unclassified;WCHB1-60_unclassified;WCHB1-60_unclassified;WCHB1-60_unclassified;WCHB1-60_unclassified;WCHB1-60_unclassified;.1
*OTUs found in all cockroach gut microbiota
